# Supplementary material for: Comparative Proteomic Analysis Reveals Mx1 Inhibits Senecavirus A Replication in PK-15 Cells by Interacting with the Capsid Proteins VP1, VP2 and VP3
Source: MDPI journal article supplement (doi:10.3390/v14050863), 2022-04-21
Supplement: s1 [file s1]

**Supplementary Table S3 The differentially expressed proteins identified by TMT labeling coupled with LC-MS/MS analysis of PK-15 cells in response to SVA infection at 36 hpi**

| Protein name                                                                  | Uniport<br>accession No. | Log <sub>2</sub> ratios<br>(infection/control) | peptides | Sequence<br>coverage<br>(%) | P-values | functions                                                                               |
|-------------------------------------------------------------------------------|--------------------------|------------------------------------------------|----------|-----------------------------|----------|-----------------------------------------------------------------------------------------|
| <b>Upregulated proteins in PK-15-infected cells (a total of 426 proteins)</b> |                          |                                                |          |                             |          |                                                                                         |
| DNA topoisomerase I                                                           | I3LTP0                   | 1.608012                                       | 1        | 2                           | 0.008676 | Ribonucleotide binding                                                                  |
| DNA_MISMATCH_REPAIR_2<br>domain-containing protein                            | I3L5Z8                   | 1.389998                                       | 2        | 2                           | 0.008423 | Function unknown                                                                        |
| FIP-RBD domain-containing<br>protein                                          | A0A4X1UDM9               | 1.374843                                       | 1        | 32                          | 0.01386  | Immune system process;                                                                  |
| Vitronectin                                                                   | P48819                   | 1.369345                                       | 2        | 4                           | 0.009992 | Function unknown                                                                        |
| Uncharacterized protein                                                       | A0A4X1V7R2               | 1.344087                                       | 1        | 0                           | 0.001621 | Positive regulation of cellular process; binding                                        |
| Protein S100-A14 isoform X1                                                   | F1SFV3                   | 1.341646                                       | 2        | 15                          | 0.01064  | Function unknown                                                                        |
| Uncharacterized protein                                                       | A0A4X1U802               | 1.340422                                       | 1        | 0                           | 0.007536 | Function unknown                                                                        |
| Nebulin isoform X24                                                           | A0A480QQC5               | 1.303187                                       | 1        | 0                           | 0.00395  | Defense response to other organism; peptidase activity, acting on L-amino acid peptides |
| 2'-5'-oligoadenylate synthase-<br>like protein isoform a                      | F1RIV0                   | 1.275293                                       | 13       | 44                          | 0.0376   | Organic cyclic compound binding                                                         |
| Uncharacterized protein                                                       | A0A5G2QLT7               | 1.179408                                       | 2        | 4                           | 0.006756 | Function unknown                                                                        |
| mRNA-capping enzyme                                                           | A0A4X1VEE3               | 1.179021                                       | 3        | 7                           | 0.01494  | Function unknown                                                                        |
| Uncharacterized protein                                                       | A0A4X1WD16               | 1.165596                                       | 1        | 6                           | 0.003765 | Function unknown                                                                        |
| UPAR/Ly6 domain-containing<br>protein                                         | A0A287B805               | 1.163197                                       | 3        | 45                          | 0.004268 | Function unknown                                                                        |
| FAM184 domain-containing                                                      | I3LV88                   | 1.130018                                       | 1        | 1                           | 0.004733 | Function unknown                                                                        |

|                              |            |          |    |    |          |                                                                         |
|------------------------------|------------|----------|----|----|----------|-------------------------------------------------------------------------|
| protein                      |            |          |    |    |          |                                                                         |
| Required for excision 1-B    | A0A287BRG2 | 1.116044 | 2  | 11 | 0.03597  | Function unknown                                                        |
| domain-containing protein    |            |          |    |    |          |                                                                         |
| isoform 2                    |            |          |    |    |          |                                                                         |
| CCHC-type domain-containing  | F1SMW0     | 1.116037 | 2  | 3  | 0.01683  | Function unknown                                                        |
| protein                      |            |          |    |    |          |                                                                         |
| Gc-globulin                  | A0A4X1T9I2 | 1.113611 | 2  | 8  | 0.004535 | Receptor binding                                                        |
| Mitochondrial fission factor | A0A4X1U473 | 1.112803 | 2  | 53 | 0.02686  | Negative regulation of cellular process;                                |
| Apolipoprotein D             | A0A5K1TWC1 | 1.096848 | 3  | 14 | 0.000102 | Function unknown                                                        |
| Exocyst complex component 2  | A0A287AU70 | 1.080402 | 1  | 23 | 0.00272  | Function unknown                                                        |
| Ribonuclease H               | A0A5G2R922 | 1.065412 | 1  | 7  | 0.04733  | Peptidase activity, acting on L-amino acid peptides                     |
| Uncharacterized protein      | A0A5G2RNJ9 | 1.02267  | 1  | 2  | 0.02215  | Negative regulation of blood coagulation; protein binding               |
| Plasminogen                  | P06867     | 1.003582 | 10 | 15 | 0.02445  | Function unknown                                                        |
| DALR anticodon-binding       | F1SKI7     | 0.962701 | 1  | 2  | 0.03331  | Negative regulation of cellular process;                                |
| domain-containing protein 3  |            |          |    |    |          |                                                                         |
| isoform 1                    |            |          |    |    |          |                                                                         |
| Uncharacterized protein      | A0A287A6X8 | 0.954095 | 1  | 2  | 0.00691  | Positive regulation of cellular process;                                |
| Apolipoprotein A-I           | K7GM40     | 0.940785 | 5  | 20 | 0.00224  | Function unknown                                                        |
| RNF111_N domain-containing   | A0A4X1URL2 | 0.929774 | 1  | 6  | 0.003849 | Function unknown                                                        |
| protein                      |            |          |    |    |          |                                                                         |
| Collagen IV NC1 domain-      | A0A4X1U499 | 0.927763 | 1  | 1  | 0.03392  | Peptidase inhibitor activity                                            |
| containing protein           |            |          |    |    |          |                                                                         |
| Apolipoprotein H             | A0A140TAK8 | 0.927612 | 3  | 13 | 0.01121  | Function unknown                                                        |
| Uncharacterized protein      | A0A287AZI1 | 0.918229 | 2  | 9  | 0.001764 | Cholesterol efflux; peptidase activity, acting on L-amino acid peptides |
| Apolipoprotein M             | A0A287AVQ5 | 0.917947 | 4  | 25 | 0.01145  | Function unknown                                                        |
| RING-type domain-containing  | A0A5G2QXW7 | 0.915669 | 3  | 16 | 0.01611  | Function unknown                                                        |

|                                                       |            |          |    |    |          |                                                                                     |
|-------------------------------------------------------|------------|----------|----|----|----------|-------------------------------------------------------------------------------------|
| protein                                               |            |          |    |    |          |                                                                                     |
| Uncharacterized protein                               | A0A5G2QJ57 | 0.8835   | 2  | 5  | 0.02457  | Function unknown                                                                    |
| Transmembrane protein 147                             | A0A4X1TJ50 | 0.863388 | 2  | 13 | 0.04743  | Positive regulation of cellular process;                                            |
| Steroidogenic acute regulatory protein, mitochondrial | Q5Q0U1     | 0.838784 | 1  | 2  | 0.001353 | Cellular biosynthetic process;                                                      |
| Alpha-1,4-N-acetylglucosaminyltransferase             | A0A0B8RZT0 | 0.833832 | 3  | 12 | 0.03689  | Biological adhesion;                                                                |
| Ig-like domain-containing protein                     | A0A5G2QW86 | 0.816222 | 2  | 44 | 0.003373 | Nitric oxide metabolic process; peptidase activity, acting on L-amino acid peptides |
| Nitric-oxide synthase (NADPH) (Fragment)              | B4YYD8     | 0.798366 | 1  | 1  | 0.03782  | Transferase activity, transferring hexosyl groups                                   |
| ANK_REP_REGION domain-containing protein              | A0A4X1U612 | 0.794568 | 1  | 14 | 0.008972 | Function unknown                                                                    |
| Nuclear autoantigen Sp-100 isoform 4                  | R4L6V8     | 0.7902   | 2  | 28 | 0.001253 | Positive regulation of cellular process;                                            |
| C3-beta-c                                             | I3LTB8     | 0.777353 | 4  | 2  | 0.01585  | Function unknown                                                                    |
| Uncharacterized protein                               | A0A4X1SYC3 | 0.777089 | 1  | 2  | 0.03824  | Binding                                                                             |
| Vitellogenin domain-containing protein                | F1SCV9     | 0.767211 | 16 | 3  | 0.004199 | Function unknown                                                                    |
| Uncharacterized protein                               | A0A4X1V704 | 0.764547 | 1  | 1  | 0.03549  | Function unknown                                                                    |
| CCR4-NOT transcription complex subunit 11             | F1STG2     | 0.760944 | 4  | 16 | 0.008723 | Scavenger receptor activity                                                         |
| Uncharacterized protein                               | A0A5G2QG99 | 0.751707 | 1  | 0  | 0.02094  | Function unknown                                                                    |
| Uncharacterized protein                               | A0A4X1TX07 | 0.749423 | 2  | 14 | 0.003484 | Function unknown                                                                    |
| Alpha-2-macroglobulin isoform a                       | A0A480SMD8 | 0.746027 | 4  | 2  | 0.02013  | Function unknown                                                                    |

|                                                       |            |          |    |    |          |                                                                                  |
|-------------------------------------------------------|------------|----------|----|----|----------|----------------------------------------------------------------------------------|
| RING-type domain-containing protein                   | A0A287B7H5 | 0.733725 | 1  | 2  | 0.002055 | Hydrogen peroxide metabolic process;                                             |
| Hemoglobin subunit epsilon                            | F1RII6     | 0.73326  | 1  | 13 | 0.005017 | Function unknown                                                                 |
| Uncharacterized protein                               | A0A4X1UW90 | 0.722423 | 27 | 18 | 0.01868  | Function unknown                                                                 |
| Galectin                                              | A0A287A342 | 0.720528 | 11 | 45 | 0.0139   | Function unknown                                                                 |
| Homeobox protein cut-like                             | A0A4X1U3F5 | 0.71351  | 2  | 2  | 0.03109  | Function unknown                                                                 |
| VWFA domain-containing protein                        | A0A4X1SK62 | 0.699449 | 1  | 9  | 0.002507 | Function unknown                                                                 |
| J domain-containing protein                           | A0A4X1VG11 | 0.689434 | 5  | 46 | 0.007554 | Function unknown                                                                 |
| MYND-type domain-containing protein                   | A0A4X1VY99 | 0.687404 | 5  | 18 | 0.005013 | Extracellular structure organization; binding                                    |
| GFO_IDH_MocA domain-containing protein                | A0A4X1UEI6 | 0.685007 | 1  | 2  | 0.01032  | Signal transduction;                                                             |
| Uncharacterized protein                               | A0A4X1SW44 | 0.681491 | 3  | 2  | 0.04938  | Multicellular organism development; nucleoside-triphosphatase regulator activity |
| Translocon-associated protein subunit beta            | A0A480W8D2 | 0.681344 | 1  | 3  | 0.01545  | Function unknown                                                                 |
| Ferritin                                              | A0A4X1VYT5 | 0.677644 | 7  | 37 | 0.00614  | Oxidoreductase activity                                                          |
| Tumor necrosis factor receptor superfamily member 10C | A0A480PT21 | 0.67473  | 1  | 6  | 0.007144 | Function unknown                                                                 |
| Serine incorporator 3                                 | A0A480PEC3 | 0.673034 | 2  | 3  | 0.000596 | Nucleoside-triphosphatase activity                                               |
| Aminopeptidase                                        | K9J6I5     | 0.670245 | 3  | 38 | 0.005152 | Ribonucleotide binding                                                           |
| Voltage-dependent anion-selective channel protein 2   | A0A4X1UZQ9 | 0.667953 | 1  | 15 | 0.003067 | Lipid binding                                                                    |
| Uncharacterized protein                               | F1SM15     | 0.667645 | 1  | 1  | 0.004416 | Function unknown                                                                 |
| Armadillo repeat-containing protein 4 isoform X3      | A0A480MFY5 | 0.665857 | 2  | 2  | 0.006089 | Function unknown                                                                 |

|                                                                                      |            |          |    |    |          |                                                                          |
|--------------------------------------------------------------------------------------|------------|----------|----|----|----------|--------------------------------------------------------------------------|
| Reverse transcriptase domain-containing protein                                      | A0A5G2QY09 | 0.665604 | 1  | 3  | 0.001643 | Integrin binding                                                         |
| Uncharacterized protein                                                              | A0A4X1VY50 | 0.665239 | 1  | 1  | 0.001571 | Positive regulation of cellular process;                                 |
| DNA-dependent activator of IFN-regulatory factor                                     | B8XX91     | 0.661183 | 6  | 46 | 0.0129   | Function unknown                                                         |
| Arf-GAP with Rho-GAP domain, ANK repeat and PH domain-containing protein 1 isoform c | A0A481BP67 | 0.657348 | 1  | 10 | 0.008637 | Receptor binding                                                         |
| GTPase-activating Rap/Ran-GAP domain-like protein 3 isoform X1                       | I3LIY1     | 0.655506 | 1  | 1  | 0.007202 | Odontogenesis;                                                           |
| Aquaporin-5                                                                          | A0A4X1WCJ0 | 0.65041  | 1  | 2  | 0.02023  | Protein binding                                                          |
| Protein FAM173A isoform 1                                                            | A0A481BZ18 | 0.64809  | 6  | 40 | 9.80E-05 | Triglyceride lipase activity                                             |
| Uncharacterized protein                                                              | A0A5G2RAX9 | 0.639818 | 1  | 1  | 0.03078  | Function unknown                                                         |
| Phospholipid-transporting ATPase                                                     | M3TYF0     | 0.639109 | 1  | 1  | 0.009552 | Nitrogen compound metabolic process;                                     |
| Ribosomal RNA processing protein 36 homolog isoform 1                                | A0A480TNH7 | 0.635574 | 5  | 24 | 0.02842  | Type I interferon signaling pathway; protein heterodimerization activity |
| Interferon alpha/beta receptor 1                                                     | A0A4X1TWF4 | 0.635331 | 1  | 3  | 0.001839 | Positive regulation of cellular process;                                 |
| Clusterin                                                                            | A0A5S8KLN1 | 0.631485 | 12 | 34 | 0.01402  | Protein binding                                                          |
| Peptidase M12B domain-containing protein                                             | F1SHP1     | 0.626314 | 9  | 14 | 0.002429 | Molecular carrier activity                                               |
| Protein kinase domain-containing protein                                             | A0A287AK13 | 0.617633 | 4  | 7  | 0.004804 | Negative regulation of cellular process;                                 |

|                                                      |            |          |    |    |          |                                                                                 |
|------------------------------------------------------|------------|----------|----|----|----------|---------------------------------------------------------------------------------|
| RING-type domain-containing protein                  | F1STG1     | 0.615879 | 2  | 5  | 0.03779  | Peptidase inhibitor activity                                                    |
| 3-hydroxy-3-methylglutaryl coenzyme A reductase      | A0A4X1SQE9 | 0.615048 | 8  | 11 | 0.00588  | Positive regulation of cellular process;                                        |
| Histone acetyltransferase                            | A0A4X1UTM8 | 0.614914 | 10 | 26 | 0.01368  | Function unknown                                                                |
| Aprotinin (Fragment)                                 | B0LXF7     | 0.611489 | 1  | 26 | 0.004965 | Microtubule-based movement; peptidase activity, acting on L-amino acid peptides |
| Kinesin-like protein                                 | A0A4X1TA22 | 0.609534 | 6  | 12 | 0.01341  | Macromolecule glycosylation;                                                    |
| Beta-1,4-glucuronyltransferase 1                     | V9LLL5     | 0.607815 | 4  | 15 | 0.004261 | Transmembrane transporter activity                                              |
| Olfactory receptor                                   | A0A5G2QYK1 | 0.598738 | 1  | 2  | 0.04429  | Function unknown                                                                |
| dTMP kinase                                          | A0A480PP50 | 0.588833 | 2  | 60 | 0.006871 | Function unknown                                                                |
| Complex I-KFYI                                       | A1XQS6     | 0.587608 | 2  | 24 | 0.04307  | Function unknown                                                                |
| CCDC66 domain-containing protein                     | I3L7C7     | 0.580054 | 1  | 1  | 0.04985  | Aromatic compound catabolic process;                                            |
| CCR4-NOT transcription complex subunit 9             | A0A5G2QHJ4 | 0.579651 | 9  | 34 | 0.003771 | Function unknown                                                                |
| Putative E3 ubiquitin-protein ligase HERC6 isoform 1 | A0A480M1Q1 | 0.579436 | 1  | 33 | 0.01541  | Response to stimulus; protein binding                                           |
| Importin N-terminal domain-containing protein        | A0A4X1ST59 | 0.578024 | 1  | 43 | 0.00387  | Positive regulation of cellular process;                                        |
| Glycoprotein (Fragment)                              | Q9XSA8     | 0.576034 | 1  | 75 | 0.00077  | DNA metabolic process;                                                          |
| CBFD_NFYB_HMF domain-containing protein              | A0A287AUX2 | 0.571157 | 3  | 33 | 0.02543  | Positive regulation of protein phosphorylation;                                 |
| Insulin                                              | P01315     | 0.570898 | 2  | 26 | 0.002678 | Hormone activity                                                                |
| MHC class I antigen                                  | A1YH92     | 0.565385 | 4  | 22 | 0.03329  | Heterocyclic compound binding                                                   |
| WD_REPEATS_REGION                                    | A0A4X1VPC0 | 0.564199 | 2  | 4  | 0.000832 | Function unknown                                                                |

|                                                   |            |          |   |    |          |                                                               |
|---------------------------------------------------|------------|----------|---|----|----------|---------------------------------------------------------------|
| domain-containing protein                         |            |          |   |    |          |                                                               |
| SERPIN domain-containing protein                  | A0A4X1U844 | 0.562966 | 7 | 20 | 0.007007 | Alcohol transmembrane transporter activity                    |
| Uncharacterized protein                           | A0A4X1UQJ8 | 0.557041 | 2 | 10 | 0.01275  | Function unknown                                              |
| SERPIN domain-containing protein                  | A0A4X1U6E7 | 0.555549 | 7 | 17 | 0.007761 | Ribonucleotide binding                                        |
| Uncharacterized protein                           | A0A4X1VV99 | 0.544986 | 2 | 4  | 0.00179  | Metal ion transport;                                          |
| Ferritin                                          | A0A4X1VGP9 | 0.544938 | 8 | 56 | 0.01707  | Function unknown                                              |
| Uncharacterized protein                           | A0A5G2QG05 | 0.544345 | 3 | 11 | 0.00704  | Ubiquitin-like protein ligase activity                        |
| PRELI domain-containing protein 3B                | A0A287AXX7 | 0.54228  | 4 | 34 | 0.01647  | Protein modification process; organic cyclic compound binding |
| Glyco_transf_24 domain-containing protein         | A0A5G2Q988 | 0.539164 | 1 | 49 | 0.009863 | Ion binding                                                   |
| FERM domain-containing protein                    | A0A4X1SDT9 | 0.537789 | 2 | 3  | 0.0459   | Function unknown                                              |
| Uncharacterized protein                           | A0A4X1U394 | 0.534186 | 2 | 20 | 0.002162 | Binding                                                       |
| Apolipoprotein A2 (Fragment)                      | Q7YRR7     | 0.532336 | 1 | 53 | 0.03981  | DNA binding                                                   |
| Aminopeptidase                                    | K9J4P1     | 0.531619 | 7 | 7  | 0.02988  | Binding                                                       |
| Pleckstrin homology-like domain family A member 1 | F1SGD8     | 0.531029 | 1 | 2  | 0.02619  | Function unknown                                              |
| Uncharacterized protein                           | F6PUJ1     | 0.529644 | 1 | 9  | 0.0156   | RNA binding                                                   |
| Tripartite motif-containing protein 26            | B6ICV1     | 0.529153 | 5 | 11 | 0.002027 | Positive regulation of cellular process;                      |
| Sterol regulatory element-binding protein 1       | O97676     | 0.52799  | 2 | 2  | 0.02317  | Response to stimulus;                                         |
| Prothrombin                                       | A0A4X1VLZ9 | 0.526259 | 6 | 9  | 0.008947 | Function unknown                                              |

|                                                  |            |          |    |    |          |                                                      |
|--------------------------------------------------|------------|----------|----|----|----------|------------------------------------------------------|
| Interferon-related<br>developmental regulator 2  | A0A480RN29 | 0.525085 | 3  | 12 | 0.003586 | Positive regulation of cellular process;             |
| Beta-2-microglobulin                             | A0A4X1VG41 | 0.523692 | 3  | 32 | 0.01886  | Small molecule metabolic process;                    |
| Selenide, water dikinase 2                       | A1YIZ1     | 0.523492 | 5  | 18 | 0.03011  | Function unknown                                     |
| Integrin alpha-3 preproprotein                   | A0A480ZI48 | 0.522856 | 27 | 33 | 0.00386  | Cellular component organization or biogenesis;       |
| HAUS6_N domain-containing<br>protein             | A0A5G2QNR3 | 0.521341 | 8  | 12 | 0.000392 | Function unknown                                     |
| Uncharacterized protein                          | F1SRY9     | 0.51995  | 6  | 20 | 0.04941  | Function unknown                                     |
| Ubiquitin carboxyl-terminal<br>hydrolase         | A0A4X1UQ80 | 0.517469 | 12 | 17 | 0.002366 | Inositol phosphate phosphatase activity              |
| RING-type domain-containing<br>protein           | F1S3S2     | 0.514378 | 21 | 33 | 0.005338 | Protein binding                                      |
| Zinc finger protein 75D isoform<br>1             | A0A480WRF9 | 0.512281 | 2  | 6  | 0.04484  | Function unknown                                     |
| Uncharacterized protein                          | A0A4X1T205 | 0.509032 | 8  | 35 | 0.000136 | Function unknown                                     |
| Uncharacterized protein                          | F1SL31     | 0.506237 | 1  | 34 | 0.001654 | Function unknown                                     |
| Carbohydrate sulfotransferase<br>(Fragment)      | A0A480V2S8 | 0.503091 | 3  | 9  | 0.01965  | Regulation of microtubule cytoskeleton organization; |
| Spindle and kinetochore-<br>associated protein 1 | A0A4X1UHG2 | 0.501485 | 2  | 10 | 0.000423 | Function unknown                                     |
| Uncharacterized protein                          | A0A4X1VCI3 | 0.500037 | 1  | 7  | 0.02448  | Positive regulation of cellular process;             |
| C-type lectin domain-<br>containing protein      | A0A4X1V3B9 | 0.500018 | 1  | 3  | 0.006962 | Ion binding                                          |
| TLDc domain-containing<br>protein                | A0A4X1UQ31 | 0.499408 | 7  | 43 | 0.03456  | Protein dimerization activity                        |
| Uncharacterized protein                          | A0A5G2QC13 | 0.497516 | 2  | 8  | 0.001074 | Function unknown                                     |

|                                                                          |            |          |    |    |          |                                                   |
|--------------------------------------------------------------------------|------------|----------|----|----|----------|---------------------------------------------------|
| Uncharacterized protein                                                  | F1SBB3     | 0.490343 | 33 | 12 | 0.002933 | Function unknown                                  |
| Bifunctional apoptosis<br>regulator isoform 1                            | A0A480KEY4 | 0.489213 | 2  | 8  | 0.001272 | Organic cyclic compound binding                   |
| Uncharacterized protein                                                  | A0A4X1UAA6 | 0.488351 | 6  | 5  | 0.04062  | Function unknown                                  |
| t-SNARE coiled-coil homology<br>domain-containing protein                | F1RI88     | 0.487794 | 8  | 30 | 0.002533 | UDP-glycosyltransferase activity                  |
| Tyrosine-protein phosphatase<br>non-receptor type 3 isoform<br>X3        | A0A480PP88 | 0.485733 | 3  | 4  | 0.04502  | Function unknown                                  |
| TLDC domain-containing<br>protein                                        | I3LMG2     | 0.484843 | 1  | 45 | 0.04937  | Morphogenesis of an epithelium;                   |
| Protein fem-1 homolog B                                                  | I3L6T4     | 0.484429 | 5  | 10 | 0.02108  | Negative regulation of cellular process;          |
| Albumin                                                                  | A0A287BAY9 | 0.483031 | 9  | 12 | 0.002365 | Thrombospondin receptor activity                  |
| Tetratricopeptide repeat<br>protein 14 isoform a                         | A0A287AVL3 | 0.480315 | 1  | 1  | 0.02335  | Chromosome organization;                          |
| Follicle-stimulating hormone<br>primary response protein 1<br>(Fragment) | Q5K2Q1     | 0.47309  | 1  | 14 | 0.03252  | Protein ubiquitination;                           |
| Ankyrin repeat and SOCS box<br>protein 3 isoform X1                      | F1SQJ4     | 0.472508 | 1  | 2  | 0.03683  | Fatty acid elongation, saturated fatty acid;      |
| Elongation of very long chain<br>fatty acids protein (Fragment)          | B3VHV3     | 0.472016 | 2  | 6  | 2.50E-05 | Transferase activity, transferring hexosyl groups |
| DNAJ homolog subfamily C<br>member 7                                     | A0A480W4L0 | 0.471488 | 1  | 53 | 0.04066  | Function unknown                                  |
| MateRNAI embryonic leucine<br>zipper kinase                              | F1ST84     | 0.468102 | 4  | 8  | 0.04776  | Macromolecule metabolic process; protein binding  |

|                                                                 |            |          |    |    |          |                                                                                 |
|-----------------------------------------------------------------|------------|----------|----|----|----------|---------------------------------------------------------------------------------|
| Proteasome subunit beta                                         | Q09YA9     | 0.46701  | 7  | 33 | 0.02331  | Function unknown                                                                |
| Prostaglandin F2 receptor<br>negative regulator                 | A0A480JG52 | 0.46445  | 2  | 40 | 0.0344   | Function unknown                                                                |
| Uncharacterized protein                                         | A0A4X1THV0 | 0.463487 | 3  | 39 | 0.003107 | Catalytic activity, acting on DNA                                               |
| Eyes absent homolog                                             | A0A4X1TSB9 | 0.460583 | 1  | 12 | 0.04591  | Positive regulation of cellular process;                                        |
| WD_REPEATS_REGION<br>domain-containing protein                  | A0A4X1ST95 | 0.459332 | 5  | 14 | 0.000418 | Function unknown                                                                |
| AMMECR1 domain-containing<br>protein                            | A0A4X1VSW4 | 0.458672 | 3  | 17 | 0.001042 | Positive regulation of cellular process; translation initiation factor activity |
| ADP-ribosylation factor-like<br>protein 6-interacting protein 1 | K9IVS1     | 0.457816 | 3  | 23 | 0.01166  | Function unknown                                                                |
| Laminin subunit gamma-2<br>isoform a                            | F1S662     | 0.455673 | 36 | 38 | 0.01372  | Function unknown                                                                |
| Uncharacterized protein                                         | F1S0N9     | 0.455627 | 6  | 2  | 0.03153  | Negative regulation of cellular process; sugar-phosphatase activity             |
| Tsukushin                                                       | A0A480V1E4 | 0.45443  | 1  | 8  | 0.000382 | Function unknown                                                                |
| Protein kinase domain-<br>containing protein                    | A0A4X1V396 | 0.452426 | 2  | 3  | 0.008773 | Regulation of biological process;                                               |
| VWFA domain-containing<br>protein                               | A0A4X1TDX0 | 0.450492 | 3  | 3  | 0.001859 | Function unknown                                                                |
| Tether containing UBX domain<br>for GLUT4 isoform 2             | A0A480NU10 | 0.449803 | 3  | 34 | 0.01429  | Regulation of blood coagulation;                                                |
| Antithrombin-III                                                | A0A480P2S5 | 0.449632 | 6  | 12 | 0.000731 | Positive regulation of cellular process;                                        |
| PH domain-containing protein                                    | A0A4X1SI48 | 0.442961 | 1  | 7  | 0.005458 | Function unknown                                                                |
| Uncharacterized protein                                         | A0A4X1VFS0 | 0.440331 | 4  | 11 | 0.007646 | Microtubule cytoskeleton organization; binding                                  |
| Kinetochore protein Nuf2                                        | A0A480SGE8 | 0.439108 | 8  | 22 | 0.001652 | Function unknown                                                                |
| Uncharacterized protein                                         | K7GMF6     | 0.438335 | 9  | 15 | 0.00131  | Response to stimulus; mRNA binding                                              |

|                                                      |            |          |    |    |          |                                          |
|------------------------------------------------------|------------|----------|----|----|----------|------------------------------------------|
| SLA-8                                                | Q6S7D1     | 0.434535 | 9  | 41 | 0.002318 | Positive regulation of cellular process; |
| Uncharacterized protein                              | F1RM98     | 0.433283 | 6  | 19 | 0.01873  | Function unknown                         |
| Uncharacterized protein                              | A0A287A841 | 0.432281 | 2  | 34 | 0.000963 | Transmembrane transporter activity       |
| ASD2 domain-containing protein                       | A0A4X1TVX4 | 0.431572 | 1  | 13 | 0.04487  | Myeloid dendritic cell activation;       |
| StAR-related lipid transfer protein 7, mitochondrial | F1SU33     | 0.428269 | 15 | 44 | 0.001089 | Function unknown                         |
| [Histone H3]-trimethyl-L-lysine(9) demethylase       | A0A4X1W805 | 0.425629 | 7  | 8  | 0.000702 | Positive regulation of cellular process; |
| Claudin                                              | C3VML0     | 0.425049 | 3  | 21 | 0.02395  | Function unknown                         |
| G_PROTEIN_RECEP_F3_4 domain-containing protein       | A0A4X1V7D7 | 0.424796 | 4  | 14 | 0.02649  | Regulation of biological process;        |
| Glutaredoxin domain-containing protein               | A0A5G2QMG6 | 0.424339 | 5  | 21 | 0.03122  | Function unknown                         |
| Uncharacterized protein                              | A0A4X1VM59 | 0.418637 | 6  | 59 | 0.005662 | Function unknown                         |
| Little elongation complex subunit 1                  | A0A480ZUS4 | 0.418542 | 5  | 2  | 0.03733  | Function unknown                         |
| Component of oligomeric Golgi complex 2              | A0A480K7Y8 | 0.418149 | 10 | 17 | 0.01765  | Binding                                  |
| Uncharacterized protein                              | A0A4X1U745 | 0.417722 | 6  | 8  | 0.003205 | Function unknown                         |
| Hyaluronoglucosaminidase                             | F1SJB9     | 0.417343 | 3  | 2  | 0.02041  | Binding                                  |
| Integrator complex subunit 14                        | A0A5K1U644 | 0.41712  | 5  | 16 | 0.005408 | Function unknown                         |
| Uncharacterized protein                              | K7GR94     | 0.416758 | 7  | 22 | 0.000846 | UDP-glucuronate decarboxylase activity   |
| Serine/threonine-protein kinase PLK                  | A0A4X1UYN5 | 0.415803 | 4  | 30 | 0.009773 | Transcription, DNA-templated;            |
| SHS2_Rpb7-N domain-                                  | F1SC14     | 0.413302 | 5  | 18 | 0.000754 | Function unknown                         |

|                                                                 |            |          |    |    |          |                                                              |
|-----------------------------------------------------------------|------------|----------|----|----|----------|--------------------------------------------------------------|
| containing protein                                              |            |          |    |    |          |                                                              |
| Solute carrier family 30 member 2                               | B5A8K5     | 0.41314  | 1  | 3  | 0.01211  | Signal transduction;                                         |
| Delta-like protein                                              | A0A480SJP0 | 0.412715 | 1  | 1  | 0.04024  | Function unknown                                             |
| ER membrane protein complex subunit 10                          | A0A480I708 | 0.412182 | 3  | 21 | 0.000662 | Function unknown                                             |
| Uncharacterized protein                                         | A0A4X1U6L2 | 0.410847 | 2  | 1  | 0.003555 | Positive regulation of cellular process; binding             |
| RFX-type winged-helix domain-containing protein                 | A0A4X1W7L4 | 0.408226 | 1  | 1  | 0.002736 | Protein catabolic process;                                   |
| Proteasome subunit beta                                         | Q2PYM7     | 0.406666 | 6  | 37 | 0.03296  | Protein transport;                                           |
| Mitochondrial import inner membrane translocase subunit Tim10 B | A0A5G2R1A5 | 0.405398 | 3  | 48 | 0.008737 | Function unknown                                             |
| XIAP-associated factor 1                                        | K9IVW8     | 0.404605 | 6  | 29 | 0.02781  | Positive regulation of cellular process;                     |
| Metalloproteinase inhibitor 3                                   | A0A286ZZX3 | 0.404373 | 3  | 12 | 0.00138  | Function unknown                                             |
| Alkylated DNA repair protein alkB homolog 8                     | I3LA93     | 0.40321  | 8  | 18 | 0.000905 | Function unknown                                             |
| Formyltetrahydrofolate synthetase                               | A0A480VMB4 | 0.402403 | 2  | 47 | 0.0319   | Function unknown                                             |
| C2H2-type domain-containing protein                             | A0A4X1VQG1 | 0.402077 | 4  | 39 | 0.02873  | Positive regulation of cellular process;                     |
| UBC core domain-containing protein                              | A0A4X1U068 | 0.401283 | 9  | 66 | 0.00532  | Cellular metabolic process; thrombospondin receptor activity |
| Palmitoyl acyl-CoA oxidase 1 (Fragment)                         | A7J0A9     | 0.401204 | 1  | 53 | 0.002402 | Protein heterodimerization activity                          |
| Nuclear envelope pore                                           | A0A480M484 | 0.40109  | 11 | 11 | 0.004646 | Function unknown                                             |

|                                         |            |          |    |    |          |                                                                                                 |
|-----------------------------------------|------------|----------|----|----|----------|-------------------------------------------------------------------------------------------------|
| membrane protein POM 121                |            |          |    |    |          |                                                                                                 |
| isoform X1                              |            |          |    |    |          |                                                                                                 |
| Uncharacterized protein                 | A0A286ZWB1 | 0.398841 | 7  | 35 | 0.000665 | Function unknown                                                                                |
| EEF1A lysine                            | A0A481DEK1 | 0.396999 | 4  | 21 | 0.008492 | Function unknown                                                                                |
| methyltransferase 1                     |            |          |    |    |          |                                                                                                 |
| RanBP-type and C3HC4-type               | F1S7J3     | 0.395297 | 2  | 6  | 0.0287   | Function unknown                                                                                |
| zinc finger-containing protein 1        |            |          |    |    |          |                                                                                                 |
| High mobility group AT-hook 1           | B6CVL5     | 0.394024 | 1  | 51 | 0.003348 | Function unknown                                                                                |
| transcript variant 2                    |            |          |    |    |          |                                                                                                 |
| Uncharacterized protein                 | A0A4X1TIC9 | 0.393926 | 1  | 21 | 0.01303  | Binding                                                                                         |
| RNA-binding protein 12                  | I3LLW0     | 0.39217  | 2  | 16 | 0.008001 | Positive regulation of cellular component biogenesis; lysophospholipid acyltransferase activity |
| Hepatocyte growth factor receptor       | Q2QLE0     | 0.391816 | 33 | 33 | 0.000129 | Translational termination;                                                                      |
| Uncharacterized protein                 | F1RJ87     | 0.391233 | 5  | 16 | 0.03001  | Function unknown                                                                                |
| Aa_trans domain-containing protein      | A0A4X1TLM5 | 0.390207 | 5  | 10 | 0.0194   | Function unknown                                                                                |
| Protein tweety homolog                  | A0A4X1TMB9 | 0.389735 | 3  | 5  | 0.002111 | Function unknown                                                                                |
| TGF-beta receptor type-2                | K7GL93     | 0.388737 | 6  | 11 | 0.004107 | Function unknown                                                                                |
| Uncharacterized protein                 | A0A4X1U767 | 0.388497 | 15 | 40 | 0.000157 | Function unknown                                                                                |
| Uncharacterized protein                 | A0A5G2RBZ9 | 0.38803  | 6  | 13 | 0.00635  | Transcription factor activity, sequence-specific DNA binding                                    |
| Sulfiredoxin                            | A0A4X1SMI5 | 0.38784  | 5  | 36 | 0.01874  | Transferase activity, transferring hexosyl groups                                               |
| Inter-alpha-trypsin inhibitor           | A0A480KGP4 | 0.387723 | 4  | 7  | 0.000499 | Function unknown                                                                                |
| heavy chain H3 preproprotein (Fragment) |            |          |    |    |          |                                                                                                 |
| Uncharacterized protein                 | A0A4X1TI35 | 0.387714 | 1  | 53 | 0.01874  | Protein transport; RNA 7-methylguanosine cap binding                                            |

|                                                              |            |          |    |    |          |                                                                                |
|--------------------------------------------------------------|------------|----------|----|----|----------|--------------------------------------------------------------------------------|
| AP-1 complex subunit gamma                                   | F1SS42     | 0.387697 | 9  | 15 | 0.01399  | Regulation of biological process;                                              |
| Ig-like domain-containing protein                            | F1RPU6     | 0.387144 | 6  | 22 | 0.005653 | Function unknown                                                               |
| Envelope protein                                             | Q6W4V3     | 0.38701  | 4  | 38 | 0.02135  | Macromolecule metabolic process; GTP binding                                   |
| TYR_PHOSPHATASE_2 domain-containing protein                  | A0A4X1W6Q1 | 0.385963 | 3  | 11 | 0.02979  | Macromolecular complex binding                                                 |
| Sema domain-containing protein                               | A0A4X1ULG5 | 0.385117 | 2  | 47 | 0.0287   | Function unknown                                                               |
| Laminin subunit alpha-1 (Fragment)                           | A0A480XDX5 | 0.383068 | 1  | 17 | 0.02095  | Function unknown                                                               |
| UPF0669 protein C6orf120 isoform 2                           | I3LL77     | 0.382963 | 2  | 17 | 0.008982 | Function unknown                                                               |
| Vesicular integral-membrane protein VIP36 (Fragment)         | A0A480VX24 | 0.38261  | 10 | 49 | 0.004954 | Negative regulation of cellular process; mannose binding                       |
| Uncharacterized protein                                      | A0A4X1U5R9 | 0.382575 | 2  | 67 | 0.02371  | Translation release factor activity                                            |
| p21-activated protein kinase-interacting protein 1           | A0A480YUK6 | 0.382338 | 14 | 51 | 0.02774  | Function unknown                                                               |
| Pentatricopeptide repeat-containing protein 1, mitochondrial | A0A480UCS6 | 0.382082 | 6  | 9  | 0.000551 | Positive regulation of cellular process;                                       |
| Cyclin B1 transcript variant 1                               | D2IE28     | 0.380655 | 6  | 19 | 0.01711  | Peptide metabolic process; phosphatidylinositol phosphate phosphatase activity |
| Gamma-secretase subunit APH-1A isoform 1                     | A0A287B0C6 | 0.379177 | 2  | 5  | 0.003874 | Catalytic activity, acting on a protein                                        |
| Mitochondrial genome maintenance exonuclease 1               | A0A4X1UZ36 | 0.378964 | 11 | 45 | 0.002142 | Function unknown                                                               |
| Uncharacterized protein                                      | A0A4X1VZD8 | 0.378868 | 20 | 64 | 0.003449 | Peptidase activity, acting on L-amino acid peptides                            |

|                                                       |            |          |    |    |          |                                                                                                |
|-------------------------------------------------------|------------|----------|----|----|----------|------------------------------------------------------------------------------------------------|
| N-myc downstream-regulated gene 3 protein             | F1S479     | 0.378783 | 8  | 28 | 0.002464 | Artery development; galactosyltransferase activity                                             |
| Dynactin subunit 5                                    | A0A286ZK88 | 0.378607 | 2  | 10 | 0.03874  | Function unknown                                                                               |
| Uncharacterized protein                               | F1SRW7     | 0.376004 | 1  | 0  | 0.03556  | RNA processing;                                                                                |
| Ribosome biogenesis protein NSA2 homolog              | A0A5G2QRK0 | 0.375581 | 11 | 45 | 0.001679 | Synaptic signaling;                                                                            |
| Uncharacterized protein                               | A0A4X1SMZ2 | 0.37489  | 6  | 33 | 0.01552  | Cellular process;                                                                              |
| Importin subunit alpha                                | I3LS70     | 0.372586 | 21 | 58 | 0.002582 | Function unknown                                                                               |
| Large neutral amino acids transporter small subunit 1 | K9IVK6     | 0.371282 | 8  | 14 | 0.01764  | Terpenoid transport;                                                                           |
| Retinol-binding protein                               | F1SC80     | 0.371107 | 9  | 72 | 0.03345  | Autophagy; protein binding                                                                     |
| Transmembrane protein 41B isoform X1                  | A0A286ZID7 | 0.37043  | 3  | 9  | 0.04224  | Antigen processing and presentation of peptide antigen; 3-oxo-lignoceryl-coa synthase activity |
| Ig-like domain-containing protein                     | A0A287A1Y1 | 0.370374 | 6  | 23 | 0.02009  | Function unknown                                                                               |
| Uncharacterized protein                               | A0A5G2R8T2 | 0.36903  | 2  | 7  | 0.003563 | Cellular protein modification process; binding                                                 |
| TYR_PHOSPHATASE_2 domain-containing protein           | A0A4X1W0Q7 | 0.365945 | 3  | 38 | 0.0376   | Positive regulation of cellular process;                                                       |
| Solute carrier family 25 member 33 (Fragment)         | A0A480JH88 | 0.365364 | 5  | 17 | 0.008218 | Function unknown                                                                               |
| Essential for reactive oxygen species protein         | A0A5G2QFI7 | 0.364868 | 4  | 15 | 0.00833  | Function unknown                                                                               |
| Uncharacterized protein                               | A0A5G2QK26 | 0.364558 | 1  | 1  | 0.01697  | Function unknown                                                                               |
| Mitoribosomal protein bs6m, mrps6                     | A0A5K1V0G5 | 0.36346  | 6  | 46 | 0.01749  | Organophosphate metabolic process;                                                             |
| 1-acylglycerol-3-phosphate O-                         | D0G0C1     | 0.359012 | 5  | 13 | 0.01967  | Binding                                                                                        |

|                                                  |            |          |    |    |          |                                                                                |
|--------------------------------------------------|------------|----------|----|----|----------|--------------------------------------------------------------------------------|
| acyltransferase 4                                |            |          |    |    |          |                                                                                |
| Uncharacterized protein                          | F1SG83     | 0.35864  | 9  | 10 | 0.002888 | Function unknown                                                               |
| Uncharacterized protein                          | I3LKY5     | 0.358548 | 14 | 55 | 0.001858 | Positive regulation of cellular process;                                       |
| Arginase                                         | A0A5S8LD81 | 0.357926 | 3  | 13 | 0.03813  | Transferase activity, transferring glycosyl groups                             |
| Protein BANP                                     | A0A481CG23 | 0.35778  | 2  | 6  | 0.03975  | Positive regulation of cellular process;                                       |
| Integrin-associated protein                      | A0A4X1SPG5 | 0.356919 | 2  | 14 | 0.007569 | Function unknown                                                               |
| ILEI domain-containing protein                   | A0A5G2R617 | 0.356399 | 4  | 21 | 0.007804 | Ribonucleotide binding                                                         |
| Integral membrane protein 2                      | A0A480V4R2 | 0.355964 | 3  | 70 | 0.005554 | Serine-type peptidase activity                                                 |
| Cytochrome P450 3A4 isoform 1                    | A0A480VJX3 | 0.355695 | 1  | 42 | 0.000675 | Ribonucleotide binding                                                         |
| Twinkle protein, mitochondrial isoform A         | I3LNP8     | 0.351642 | 4  | 8  | 0.001883 | Function unknown                                                               |
| G1 to S phase transition 2                       | F1RUJ9     | 0.351333 | 2  | 21 | 0.00399  | Positive regulation of cellular process;                                       |
| Uncharacterized protein                          | A0A4X1UQ65 | 0.350275 | 4  | 28 | 0.02476  | Function unknown                                                               |
| Small integral membrane protein 26               | I3LCG7     | 0.349361 | 3  | 31 | 0.001362 | Peptide metabolic process;                                                     |
| Signal peptidase complex catalytic subunit SEC11 | A0A481CTH0 | 0.346439 | 5  | 18 | 0.002162 | Protein ubiquitination; binding                                                |
| RING-type E3 ubiquitin transferase               | A0A287ALB7 | 0.345939 | 2  | 6  | 0.02907  | Function unknown                                                               |
| Uncharacterized protein                          | A0A5G2QEV8 | 0.345349 | 7  | 10 | 0.03842  | Cation transmembrane transport;                                                |
| Uncharacterized protein                          | A0A286ZYM2 | 0.344587 | 7  | 30 | 0.01904  | Function unknown                                                               |
| AB hydrolase-1 domain-containing protein         | A0A4X1VWB4 | 0.344448 | 2  | 9  | 0.02407  | Positive regulation of cellular process; transmembrane transporter activity    |
| Noelin-2 isoform 2                               | A0A480XA75 | 0.343091 | 1  | 2  | 0.02186  | Iron-sulfur cluster binding                                                    |
| Tax1-binding protein 1 isoform                   | A0A480K2R0 | 0.342831 | 3  | 3  | 0.00308  | Optic nerve development; inward rectifier potassium channel inhibitor activity |

|                                                        |            |          |    |    |          |                                                                                 |
|--------------------------------------------------------|------------|----------|----|----|----------|---------------------------------------------------------------------------------|
| 1                                                      |            |          |    |    |          |                                                                                 |
| Transmembrane protein 126A isoform 1                   | I3LJK4     | 0.340829 | 6  | 25 | 0.000183 | Potassium ion import across plasma membrane;                                    |
| Uncharacterized protein                                | A0A4X1SPI0 | 0.34037  | 5  | 10 | 0.02582  | C4-dicarboxylate transport;                                                     |
| Pannexin-like domain-containing protein                | A0A286ZWM5 | 0.340362 | 7  | 10 | 0.001193 | Protein dimerization activity                                                   |
| 40S ribosomal protein S23 (Fragment)                   | Q29298     | 0.340232 | 1  | 23 | 0.01787  | Function unknown                                                                |
| Forty-two-three domain-containing protein 1            | A0A4X1TP41 | 0.340093 | 3  | 14 | 0.0202   | Binding                                                                         |
| Uncharacterized protein                                | A0A4X1VTD1 | 0.340005 | 2  | 53 | 0.02167  | DNA-directed RNA polymerase activity                                            |
| Nucleolar transcription factor 1 isoform X1            | F1RQY4     | 0.33834  | 1  | 40 | 0.01288  | Cellular biosynthetic process; DNA binding                                      |
| Hexosyltransferase                                     | F1S937     | 0.338327 | 5  | 17 | 0.006929 | Function unknown                                                                |
| Solute carrier organic anion transporter family member | A0A287A0K8 | 0.337834 | 2  | 2  | 0.04983  | Cellular localization; channel activity                                         |
| Exocyst complex component                              | A0A480UT78 | 0.337021 | 4  | 8  | 0.01824  | Transferase activity, transferring hexosyl groups                               |
| CP-type G domain-containing protein                    | A0A4X1W3X9 | 0.336245 | 26 | 54 | 0.000464 | Chromatin binding                                                               |
| Peptidyl-prolyl cis-trans isomerase                    | A0A287AP21 | 0.336014 | 7  | 38 | 0.0106   | Function unknown                                                                |
| Tetraspanin                                            | A0A4X1VZD4 | 0.335804 | 1  | 3  | 0.00146  | RNA binding                                                                     |
| SANT domain-containing protein                         | A0A4X1SJM1 | 0.335667 | 3  | 5  | 0.000668 | Transcription factor activity, sequence-specific DNA binding                    |
| Methionine--tRNA ligase                                | A0A4X1VG66 | 0.335086 | 12 | 30 | 0.001792 | TRNA aminoacylation for protein translation;                                    |
| Histidine--tRNA ligase                                 | F1RGD8     | 0.334276 | 11 | 41 | 0.002018 | Small molecule metabolic process; active ion transmembrane transporter activity |

|                                                         |            |          |    |    |          |                                                                          |
|---------------------------------------------------------|------------|----------|----|----|----------|--------------------------------------------------------------------------|
| Glyco_transf_64 domain-containing protein               | A0A4X1TSD3 | 0.333328 | 1  | 2  | 0.01947  | Function unknown                                                         |
| Uncharacterized protein                                 | F1SS06     | 0.333051 | 1  | 1  | 0.006313 | Response to endoplasmic reticulum stress;                                |
| J domain-containing protein                             | A0A4X1T6M4 | 0.331497 | 7  | 20 | 0.01098  | Protein ubiquitination;                                                  |
| HECT-type E3 ubiquitin transferase                      | A0A4X1T1L2 | 0.330894 | 6  | 20 | 0.04313  | Function unknown                                                         |
| Thymidine kinase                                        | A0A286ZID2 | 0.330187 | 10 | 45 | 0.04214  | RNA binding                                                              |
| Eukaryotic elongation factor 2 kinase                   | A0A480WZ84 | 0.328616 | 11 | 18 | 0.018    | Mitotic cell cycle checkpoint;                                           |
| DNA topoisomerase 2-alpha                               | O46374     | 0.328201 | 64 | 47 | 0.000515 | Function unknown                                                         |
| Uncharacterized protein                                 | F1S4Q6     | 0.328008 | 3  | 45 | 0.01816  | Aromatic compound biosynthetic process;                                  |
| Radical S-adenosyl methionine domain-containing protein | A0A5G2R1S6 | 0.326581 | 1  | 2  | 0.01058  | Regulation of biological process; ubiquitin-like protein ligase activity |
| PCNA-associated factor                                  | A0A5G2QZV8 | 0.325984 | 1  | 6  | 0.03608  | DNA metabolic process;                                                   |
| CBFD_NFYB_HMF domain-containing protein                 | A0A4X1V1W7 | 0.32572  | 3  | 24 | 0.01174  | Lipase activity                                                          |
| Uncharacterized protein                                 | A0A5G2R2X8 | 0.324931 | 1  | 5  | 0.02414  | Carbohydrate metabolic process;                                          |
| 4F2 cell-surface antigen heavy chain isoform b          | A0A481D7K6 | 0.324575 | 20 | 46 | 0.005092 | Function unknown                                                         |
| RNA helicase                                            | A0A480I8F5 | 0.323738 | 9  | 16 | 0.01436  | Function unknown                                                         |
| GCFC domain-containing protein                          | I3L6B6     | 0.323689 | 1  | 1  | 0.02888  | Ribosomal large subunit assembly; metal ion binding                      |
| Ribosome assembly factor mrt4                           | A0A287A384 | 0.32281  | 14 | 54 | 0.007836 | Signal transduction;                                                     |
| Uncharacterized protein                                 | A0A4X1UNF8 | 0.322658 | 6  | 11 | 0.007857 | Macromolecular complex binding                                           |

|                                                      |            |          |    |    |          |                                                                       |
|------------------------------------------------------|------------|----------|----|----|----------|-----------------------------------------------------------------------|
| Kinetochore protein Spc24                            | A0A287B6S8 | 0.322607 | 8  | 45 | 0.004668 | Function unknown                                                      |
| Uncharacterized protein                              | A0A4X1UJN1 | 0.322408 | 4  | 14 | 0.001864 | Positive regulation of cellular process; transition metal ion binding |
| Nuclear cap-binding protein subunit 1 isoform 1      | A0A480LT67 | 0.32209  | 4  | 45 | 0.0189   | Anatomical structure development; integrin binding                    |
| EABR domain-containing protein                       | A0A287AZV2 | 0.321768 | 13 | 32 | 0.004702 | Function unknown                                                      |
| Rhomboid domain-containing protein                   | A0A287B167 | 0.321206 | 6  | 16 | 0.03443  | Anion binding                                                         |
| RING-type E3 ubiquitin transferase                   | A0A5G2R8C3 | 0.320853 | 2  | 3  | 0.009024 | RNA processing; peptidyl-prolyl cis-trans isomerase activity          |
| Ribosomal RNA-processing protein 43                  | A0A4X1T3H1 | 0.320023 | 8  | 33 | 0.001722 | Macromolecule metabolic process;                                      |
| Ubiquitinyl hydrolase 1                              | A0A4X1SI54 | 0.318744 | 3  | 16 | 0.02854  | Positive regulation of cellular process;                              |
| Cytochrome c oxidase copper chaperone                | D2XUP7     | 0.318482 | 3  | 59 | 0.01172  | Function unknown                                                      |
| rRNA adenine N(6)-methyltransferase                  | A0A480VKC7 | 0.318415 | 6  | 32 | 0.0121   | Function unknown                                                      |
| Exonuclease domain-containing protein                | A0A4X1VXR2 | 0.317153 | 8  | 30 | 0.000623 | Function unknown                                                      |
| DNAJ homolog subfamily B member 14 isoform 1         | A0A287AP60 | 0.315087 | 6  | 15 | 0.01357  | Protein binding                                                       |
| Non-receptor tyrosine-protein kinase TNK1 isoform X1 | A0A480QM13 | 0.314991 | 9  | 19 | 0.01936  | Cellular response to alcohol; oxidoreductase activity                 |
| Adrenodoxin, mitochondrial                           | P00258     | 0.31485  | 7  | 37 | 0.003011 | Function unknown                                                      |
| FAD-binding PCMH-type domain-containing protein      | A0A4X1SXF0 | 0.314644 | 9  | 23 | 0.006716 | Organic hydroxy compound metabolic process;                           |

|                                                           |            |          |    |    |          |                                                              |
|-----------------------------------------------------------|------------|----------|----|----|----------|--------------------------------------------------------------|
| GP-PDE domain-containing protein                          | A0A4X1VIV5 | 0.314504 | 7  | 23 | 0.02174  | Function unknown                                             |
| Peptidylprolyl isomerase                                  | A0A287B5T6 | 0.314469 | 4  | 43 | 0.004683 | Binding                                                      |
| Uncharacterized protein                                   | A0A4X1UD59 | 0.314218 | 15 | 34 | 0.02837  | Heterocyclic compound binding                                |
| AAA domain-containing protein                             | A0A287BJX1 | 0.314129 | 9  | 6  | 7.00E-06 | Positive regulation of cellular process;                     |
| Integrin beta                                             | A0A480JX12 | 0.313969 | 25 | 41 | 0.002313 | Protein heterodimerization activity                          |
| Uncharacterized protein                                   | A0A287BKK7 | 0.313873 | 5  | 17 | 0.000364 | Regulation of transcription from RNA polymerase II promoter; |
| Max-like protein X isoform gamma                          | F1S1D8     | 0.313359 | 3  | 17 | 0.005952 | RNA processing; binding                                      |
| RNA-binding protein NOB1                                  | F1S396     | 0.313008 | 15 | 44 | 0.003561 | Endonuclease activity                                        |
| Semaphorin-3C                                             | A0A4X1SIW8 | 0.312767 | 16 | 27 | 0.006512 | Function unknown                                             |
| Hexosyltransferase                                        | A0A287AWP7 | 0.312636 | 3  | 7  | 0.003797 | Function unknown                                             |
| Uncharacterized protein                                   | A0A4X1V1X7 | 0.312217 | 3  | 5  | 0.01796  | Function unknown                                             |
| Uncharacterized protein                                   | A0A4X1SVJ5 | 0.310974 | 25 | 34 | 0.00357  | Transition metal ion binding                                 |
| Major centromere autoantigen B                            | A0A480VMC6 | 0.310367 | 2  | 2  | 0.00599  | Positive regulation of cellular process; protein binding     |
| Sodium-coupled neutral amino acid transporter 2 isoform 1 | K9J4Q4     | 0.310346 | 3  | 12 | 0.0159   | RNA processing;                                              |
| ADAR adenosine deaminase RNA specific                     | K9J4M6     | 0.309792 | 43 | 46 | 0.0175   | Aromatic compound biosynthetic process; metal ion binding    |
| DNA-directed RNA polymerase I subunit D                   | A0A4X1TN10 | 0.309734 | 8  | 32 | 0.002069 | Function unknown                                             |
| ETS domain-containing protein                             | A0A4X1SJQ1 | 0.309576 | 2  | 4  | 0.009689 | Potassium ion transmembrane transporter activity             |
| Poly [ADP-ribose] polymerase                              | A0A4X1TD13 | 0.309349 | 45 | 31 | 0.04399  | Receptor binding                                             |

|                                                                                |            |          |    |    |          |                                                                                   |
|--------------------------------------------------------------------------------|------------|----------|----|----|----------|-----------------------------------------------------------------------------------|
| Uncharacterized protein                                                        | A0A287BB92 | 0.309046 | 5  | 10 | 0.006345 | Function unknown                                                                  |
| Uncharacterized protein                                                        | A0A287ABK7 | 0.307761 | 12 | 12 | 0.000815 | Function unknown                                                                  |
| Nucleolar protein 10                                                           | A0A286ZQ67 | 0.307394 | 21 | 39 | 0.01232  | Electron carrier activity                                                         |
| Proliferation marker protein Ki-67 isoform X1-like (Fragment)                  | A0A480VRH1 | 0.306846 | 2  | 44 | 0.04188  | Function unknown                                                                  |
| DNA-directed RNA polymerase                                                    | M3V845     | 0.306712 | 15 | 16 | 0.003357 | Methylated histone binding                                                        |
| Uncharacterized protein                                                        | A0A5G2RD08 | 0.306695 | 1  | 54 | 0.02148  | Function unknown                                                                  |
| Folypolyglutamate synthase                                                     | A0A4X1U4V3 | 0.306009 | 3  | 6  | 0.006191 | Function unknown                                                                  |
| Nicastrin                                                                      | A0A4X1VVD1 | 0.304929 | 12 | 20 | 0.000152 | Ubiquitin-dependent protein catabolic process; protein methyltransferase activity |
| UBC core domain-containing protein                                             | A0A5G2R8X5 | 0.304311 | 4  | 24 | 0.02566  | Transmembrane signaling receptor activity                                         |
| Chitobiosyldiphosphodolichol beta-mannosyltransferase isoform 1                | F1RKX2     | 0.30407  | 6  | 21 | 0.01854  | Cellular metabolic process; organic cyclic compound binding                       |
| Succinate dehydrogenase [ubiquinone] cytochrome b small subunit, mitochondrial | A5GZW8     | 0.302987 | 1  | 4  | 0.03812  | Macromolecule metabolic process; protein binding                                  |
| ATP-dependent Clp protease ATP-binding subunit clpX-like, mitochondrial        | A0A287ADU8 | 0.301699 | 30 | 54 | 6.50E-05 | Sphin;                                                                            |
| Serine palmitoyltransferase 3                                                  | F1SBJ7     | 0.301198 | 16 | 34 | 0.001862 | Function unknown                                                                  |
| Heparin cofactor 2                                                             | A0A480RKY5 | 0.300482 | 1  | 3  | 0.01494  | Function unknown                                                                  |
| UDP-glucuronate decarboxylase 1                                                | A0A480TRQ6 | 0.300334 | 9  | 32 | 0.02099  | Function unknown                                                                  |
| Uncharacterized protein                                                        | A0A4X1W3E2 | 0.300106 | 1  | 2  | 0.005724 | Function unknown                                                                  |

|                                                                       |            |          |    |    |          |                                                                                                     |
|-----------------------------------------------------------------------|------------|----------|----|----|----------|-----------------------------------------------------------------------------------------------------|
| Apoptosis-inducing factor 2 isoform X4                                | A0A480J3T0 | 0.2996   | 7  | 31 | 0.01881  | Function unknown                                                                                    |
| Proline dehydrogenase                                                 | M3V806     | 0.298944 | 8  | 18 | 0.02795  | Transmembrane transporter activity                                                                  |
| Centromere protein N                                                  | A0A480VG43 | 0.298703 | 2  | 9  | 0.03739  | Function unknown                                                                                    |
| Uncharacterized protein                                               | A0A4X1UNL2 | 0.297814 | 1  | 2  | 0.01112  | Function unknown                                                                                    |
| PHD-type domain-containing protein                                    | A0A4X1U359 | 0.297803 | 6  | 11 | 0.04966  | Function unknown                                                                                    |
| Uncharacterized protein                                               | A0A287BDP1 | 0.297694 | 1  | 25 | 0.008217 | Endonucleolytic cleavage to generate mature 5'-end of SSU-rRNA from (SSU-rRNA, 5.8S rRNA, LSU-rRNA; |
| Activator of basal transcription 1                                    | A0A287B3X6 | 0.296659 | 8  | 26 | 0.003525 | High-density lipoprotein particle receptor binding                                                  |
| Uncharacterized protein                                               | A0A287BNX8 | 0.296098 | 9  | 13 | 0.001687 | Localization; binding                                                                               |
| Solute carrier family 52, riboflavin transporter, member 2            | A0A4X1UQJ3 | 0.295974 | 1  | 2  | 0.01098  | Function unknown                                                                                    |
| Uncharacterized protein                                               | A0A5G2Q7R0 | 0.295456 | 20 | 25 | 0.00101  | Function unknown                                                                                    |
| DDB1- and CUL4-associated factor 13                                   | A0A4X1TLA1 | 0.294688 | 14 | 38 | 0.003813 | Ligase activity                                                                                     |
| Syndecan                                                              | A0A287B0S3 | 0.294624 | 3  | 9  | 0.0455   | Macromolecule metabolic process;                                                                    |
| Calumenin                                                             | A0A480YTG3 | 0.294576 | 1  | 73 | 0.04824  | Heterocyclic compound binding                                                                       |
| Cytochrome c oxidase assembly factor 5                                | A0A4X1W3F9 | 0.294573 | 7  | 16 | 0.004957 | Peptidase activity, acting on L-amino acid peptides                                                 |
| Uncharacterized protein                                               | F1RNK3     | 0.294531 | 4  | 16 | 0.01318  | RNA binding                                                                                         |
| Eukaryotic translation initiation factor 1A domain-containing protein | F1RU32     | 0.293978 | 6  | 46 | 0.01701  | Function unknown                                                                                    |

|                                                                     |            |          |    |    |          |                                                                  |
|---------------------------------------------------------------------|------------|----------|----|----|----------|------------------------------------------------------------------|
| Uncharacterized protein                                             | A0A4X1SJF6 | 0.292888 | 14 | 33 | 0.000894 | Positive regulation of cellular process; catalytic activity      |
| Ras-related protein Rap-2a                                          | Q06AU2     | 0.292687 | 6  | 63 | 0.007432 | Function unknown                                                 |
| Centromere protein X                                                | A0A5G2QZG8 | 0.292343 | 3  | 21 | 0.01992  | Function unknown                                                 |
| Phosphoinositide<br>phospholipase C                                 | A0A480J5N4 | 0.291701 | 11 | 21 | 0.01357  | 3'-5'-exoribonuclease activity                                   |
| Uncharacterized protein                                             | A0A4X1T4W4 | 0.291254 | 26 | 13 | 0.04611  | Function unknown                                                 |
| CD44 antigen                                                        | A0A4X1SP57 | 0.290887 | 8  | 22 | 0.01458  | Cation transmembrane transport; transcription regulator activity |
| Uncharacterized protein                                             | A0A4X1UJI9 | 0.290377 | 19 | 21 | 0.000377 | Macromolecule metabolic process;                                 |
| Proteasome subunit beta                                             | A0A4X1V3H8 | 0.289135 | 6  | 28 | 0.008264 | Negative regulation of cellular process;                         |
| Histone H2A                                                         | F2Z5L6     | 0.289076 | 2  | 70 | 0.01254  | Enzyme regulator activity                                        |
| Uncharacterized protein                                             | A0A4X1U855 | 0.28767  | 7  | 17 | 0.01554  | Function unknown                                                 |
| Multifunctional<br>methyltransferase subunit<br>TRM112-like protein | F1RQP1     | 0.287004 | 6  | 54 | 0.04026  | RRNA binding                                                     |
| Hermansky-Pudlak syndrome<br>5 protein homolog                      | A0A4X1T7H6 | 0.286583 | 7  | 8  | 0.009038 | Positive regulation of cellular process;                         |
| Baculoviral IAP repeat-<br>containing protein 5                     | Q9GLN5     | 0.286404 | 8  | 62 | 0.006409 | Small molecule metabolic process;                                |
| Alpha-fetoprotein                                                   | Q8MJ76     | 0.286236 | 3  | 4  | 0.01263  | Function unknown                                                 |
| Kinesin-like protein                                                | F1SIT8     | 0.285424 | 38 | 52 | 0.000282 | Primary metabolic process;                                       |
| Lipoprotein lipase                                                  | I3LUA0     | 0.284655 | 6  | 20 | 0.002814 | Macromolecular complex binding                                   |
| RNA polymerase III subunit C3                                       | F1SDD7     | 0.284615 | 16 | 37 | 0.04637  | Function unknown                                                 |
| Uncharacterized protein                                             | F1SE89     | 0.284292 | 2  | 2  | 0.007334 | Positive regulation of cellular process; small molecule binding  |
| Integrin-associated protein                                         | A0A287BQR8 | 0.284201 | 2  | 20 | 0.0207   | Function unknown                                                 |
| Uncharacterized protein                                             | A0A287ATS5 | 0.283852 | 2  | 6  | 0.03862  | RNA processing;                                                  |
| S4 RNA-binding domain-                                              | F1SJ73     | 0.283082 | 10 | 66 | 0.007847 | Function unknown                                                 |

|                                                  |            |          |    |    |          |                                                   |
|--------------------------------------------------|------------|----------|----|----|----------|---------------------------------------------------|
| containing protein                               |            |          |    |    |          |                                                   |
| LisH domain-containing protein                   | A0A287B9T7 | 0.283025 | 6  | 6  | 0.01429  | Protein binding                                   |
| Complex I assembly factor TIMMDC1, mitochondrial | A0A287BCV5 | 0.282626 | 2  | 9  | 0.03731  | Phosphoprotein phosphatase activity               |
| Uncharacterized protein                          | A0A4X1TMY0 | 0.282203 | 3  | 4  | 0.006574 | Regulation of translation;                        |
| Pumilio homolog 3                                | A0A481CG74 | 0.281818 | 27 | 44 | 0.01491  | Function unknown                                  |
| Uncharacterized protein                          | F1RFN6     | 0.280773 | 21 | 23 | 0.002804 | Pyridoxal phosphate binding                       |
| Uncharacterized protein                          | A0A4X1UQE7 | 0.279765 | 8  | 26 | 0.003737 | Small molecule binding                            |
| Uncharacterized protein                          | A0A4X1UUL9 | 0.279094 | 1  | 30 | 0.03004  | RNA processing; disulfide oxidoreductase activity |
| Polynucleotide phosphorylase 1                   | A0A287AMV5 | 0.278915 | 44 | 67 | 0.009326 | Protein localization to organelle;                |
| WD_REPEATS_REGION domain-containing protein      | A0A4X1SFI9 | 0.278651 | 14 | 59 | 0.000112 | Function unknown                                  |
| MICOS complex subunit MIC10                      | A0A4X1W4D1 | 0.278615 | 1  | 10 | 0.01305  | Function unknown                                  |
| SURF6 domain-containing protein                  | A0A4X1SZR9 | 0.277941 | 12 | 39 | 0.005286 | Small molecule metabolic process;                 |
| Inositol-1-monophosphatase                       | A0A287AVN0 | 0.27761  | 11 | 40 | 0.00396  | Function unknown                                  |
| Ubiquitin-like domain-containing protein         | I3LPR9     | 0.277451 | 3  | 16 | 0.01288  | Function unknown                                  |
| Cationic amino acid transporter 2                | A0A4X1TZW6 | 0.275748 | 2  | 5  | 0.008805 | Carbohydrate derivative binding                   |
| MICOS complex subunit MIC60                      | A0A287AMM6 | 0.275167 | 2  | 64 | 0.04329  | Active ion transmembrane transporter activity     |
| BRCA2 and CDKN1A-                                | A0A4X1V9L9 | 0.275114 | 6  | 33 | 0.009938 | Function unknown                                  |

|                               |            |          |    |    |          |                                                  |
|-------------------------------|------------|----------|----|----|----------|--------------------------------------------------|
| interacting protein           |            |          |    |    |          |                                                  |
| Nucleolar protein 16          | I3LMC8     | 0.275082 | 11 | 59 | 0.002028 | Cytoskeleton-dependent cytokinesis; mRNA binding |
| Uncharacterized protein       | A0A287AGK4 | 0.274613 | 2  | 6  | 0.001911 | Lipid binding                                    |
| Uncharacterized protein       | I3LF70     | 0.274169 | 27 | 40 | 0.007002 | Intracellular transport;                         |
| Uncharacterized protein       | A0A4X1U7W6 | 0.273407 | 11 | 42 | 0.001854 | Function unknown                                 |
| Ubiquitin-like protein 5      | A0A4X1SNZ7 | 0.272834 | 4  | 41 | 0.001813 | Positive regulation of cellular process;         |
| Epithelial cell adhesion      | Q75QW1     | 0.272824 | 10 | 30 | 0.000463 | Function unknown                                 |
| molecule                      |            |          |    |    |          |                                                  |
| NADPH:adrenodoxin             | A0A4X1SGU8 | 0.27221  | 22 | 58 | 0.002425 | RNA processing;                                  |
| oxidoreductase, mitochondrial |            |          |    |    |          |                                                  |
| KRR1 small subunit            | A0A287BCI5 | 0.271598 | 18 | 41 | 0.006162 | Function unknown                                 |
| processome component          |            |          |    |    |          |                                                  |
| GBD/FH3 domain-containing     | A0A4X1TYL3 | 0.271397 | 4  | 26 | 0.02175  | Function unknown                                 |
| protein                       |            |          |    |    |          |                                                  |
| Uncharacterized protein       | A0A4X1T474 | 0.27065  | 7  | 20 | 0.04523  | Function unknown                                 |
| SH3 domain-containing         | F1RW07     | 0.270505 | 11 | 7  | 0.003725 | Function unknown                                 |
| protein                       |            |          |    |    |          |                                                  |
| Uncharacterized protein       | I3L511     | 0.269754 | 22 | 40 | 0.002682 | Function unknown                                 |
| Uncharacterized protein       | F1STI9     | 0.269729 | 13 | 34 | 0.004674 | Negative regulation of cellular process;         |
| Transmembrane protein 109     | F1RIA7     | 0.269641 | 4  | 13 | 0.000878 | RNA processing;                                  |
| Ribosome biogenesis protein   | A0A4X1V7X7 | 0.269523 | 16 | 49 | 0.03658  | Function unknown                                 |
| WDR12                         |            |          |    |    |          |                                                  |
| Reticulon                     | A0A287B5Q4 | 0.269461 | 3  | 58 | 0.01966  | Function unknown                                 |
| Anion exchange protein        | A0A480L1L0 | 0.26943  | 10 | 14 | 0.01888  | Metal ion transmembrane transporter activity     |
| Formyltetrahydrofolate        | A0A4X1VLC6 | 0.268597 | 19 | 55 | 0.003057 | Function unknown                                 |
| synthetase                    |            |          |    |    |          |                                                  |

|                                                                                 |            |           |    |    |          |                                                                           |
|---------------------------------------------------------------------------------|------------|-----------|----|----|----------|---------------------------------------------------------------------------|
| J domain-containing protein                                                     | A0A5G2QJP3 | 0.268394  | 8  | 22 | 0.006396 | Small molecule binding                                                    |
| Uncharacterized protein                                                         | A0A4X1T6P1 | 0.267592  | 1  | 3  | 0.003698 | Positive regulation of cellular process;                                  |
| Caveolin                                                                        | A0A4X1VYQ8 | 0.266615  | 3  | 37 | 0.000957 | Function unknown                                                          |
| Smad nuclear-interacting protein 1                                              | I3LQU1     | 0.266605  | 6  | 19 | 0.006496 | Cellular response to stress; ferric iron binding                          |
| Vitamin-K-epoxide reductase (warfarin-sensitive)                                | A0A5K1VIT7 | 0.266443  | 4  | 22 | 0.01449  | Cellular localization;                                                    |
| Uncharacterized protein                                                         | I3LD98     | 0.266102  | 5  | 14 | 0.01958  | Function unknown                                                          |
| ERA-like protein 1                                                              | A0A4X1TUP5 | 0.264921  | 1  | 21 | 0.01507  | Function unknown                                                          |
| Gamma-tubulin complex component                                                 | A0A480PH59 | 0.264032  | 4  | 4  | 0.04159  | Positive regulation of cellular process;                                  |
| RNA helicase                                                                    | A0A1D8MMA5 | 0.263411  | 50 | 67 | 0.002526 | Function unknown                                                          |
| <b>Downregulated proteins in PK-15-infected cells (a total of 342 proteins)</b> |            |           |    |    |          |                                                                           |
| L-lactate dehydrogenase                                                         | A0A0K0KW08 | -1.65569  | 1  | 4  | 0.008237 | Potassium ion import across plasma membrane; oxidoreductase activity      |
| FXYD domain-containing ion transport regulator                                  | Q58K79     | -1.41767  | 2  | 42 | 0.000648 | Nucleoside phosphate metabolic process; sodium channel regulator activity |
| Uncharacterized protein                                                         | A0A4X1VD17 | -1.058658 | 17 | 44 | 0.000516 | Fatty-acyl-coa synthase activity                                          |
| Fructose-bisphosphate aldolase                                                  | A0A287B8F3 | -1.025747 | 3  | 68 | 0.005583 | Terpenoid biosynthetic process;                                           |
| Cellular retinol binding protein 1                                              | Q53J08     | -1.002595 | 2  | 57 | 0.004152 | Binding                                                                   |
| Sickle tail protein homolog isoform 1                                           | A0A480S813 | -0.959734 | 3  | 28 | 0.001971 | Function unknown                                                          |
| Retinol-binding protein 2                                                       | F1SL53     | -0.937778 | 9  | 67 | 0.000146 | Retinal binding                                                           |
| Uncharacterized protein                                                         | A0A5G2R3Z4 | -0.935147 | 30 | 53 | 0.001086 | Function unknown                                                          |
| Kinesin light chain                                                             | A0A5G2QYG0 | -0.879443 | 1  | 7  | 0.004041 | Function unknown                                                          |

|                                                                        |            |           |    |    |          |                                                                                       |
|------------------------------------------------------------------------|------------|-----------|----|----|----------|---------------------------------------------------------------------------------------|
| Tropomyosin alpha-1 chain                                              | A0A4X1TT60 | -0.845727 | 1  | 48 | 0.002443 | Function unknown                                                                      |
| Uncharacterized protein                                                | A0A5G2R1N7 | -0.827496 | 1  | 1  | 0.002978 | Positive regulation of cellular process;                                              |
| Amphiregulin                                                           | Q9BDH4     | -0.821443 | 2  | 11 | 0.006965 | Positive regulation of cellular process; growth factor receptor binding               |
| Uncharacterized protein                                                | A0A4X1UFQ6 | -0.815827 | 18 | 58 | 0.000685 | Integrin binding                                                                      |
| Acyl-CoA-binding protein                                               | A0A4X1SLV1 | -0.773105 | 2  | 33 | 0.000278 | Function unknown                                                                      |
| Low-density lipoprotein<br>receptor-related protein 2                  | C0HL13     | -0.756897 | 2  | 24 | 0.01257  | Cation transmembrane transport;                                                       |
| Cytochrome c oxidase subunit<br>1                                      | A0A097P5T5 | -0.737993 | 2  | 7  | 0.000336 | Regulation of cellular process; transmembrane transporter activity                    |
| Costars domain-containing<br>protein                                   | A0A4X1VHY8 | -0.730803 | 2  | 47 | 0.008894 | Function unknown                                                                      |
| Hypoxanthine<br>phosphoribosyltransferase                              | A0A4X1WAA9 | -0.72164  | 1  | 49 | 0.04817  | Cellular metabolic process;                                                           |
| Diamine acetyltransferase 2                                            | Q7PCJ9     | -0.707385 | 7  | 38 | 0.000591 | Binding                                                                               |
| Alkaline phosphatase                                                   | A0A287BSC3 | -0.707286 | 3  | 4  | 0.002059 | Function unknown                                                                      |
| Protein cordon-bleu isoform b                                          | A0A480RTP6 | -0.705338 | 7  | 12 | 0.003087 | Negative regulation of cellular process;                                              |
| SERPIN domain-containing<br>protein                                    | A0A5K1UE53 | -0.677183 | 1  | 1  | 0.001041 | Positive regulation of cellular process; serine-type endopeptidase inhibitor activity |
| Insulin-like growth factor-<br>binding protein 2                       | P24853     | -0.676014 | 11 | 47 | 0.004905 | Regulation of endothelial cell proliferation; protein binding                         |
| Uncharacterized protein                                                | A0A4X1VRC0 | -0.670443 | 4  | 32 | 0.01036  | System process; heparin binding                                                       |
| Caldesmon isoform X1                                                   | A0A480TAI8 | -0.670386 | 19 | 40 | 0.001695 | Calmodulin binding                                                                    |
| Uncharacterized protein                                                | I3L9K5     | -0.654332 | 5  | 29 | 0.0012   | Function unknown                                                                      |
| 1,2-dihydroxy-3-keto-5-<br>methylthiopentene<br>dioxygenase (Fragment) | A0A481CLJ7 | -0.638811 | 1  | 32 | 0.00106  | Positive regulation of cellular process;                                              |

|                                                       |            |           |    |    |          |                                                                                                              |
|-------------------------------------------------------|------------|-----------|----|----|----------|--------------------------------------------------------------------------------------------------------------|
| Phosphoenolpyruvate carboxykinase, cytosolic [GTP]    | A0A4X1UM84 | -0.632784 | 12 | 32 | 0.007105 | Small molecule metabolic process; small molecule binding                                                     |
| L-lactate dehydrogenase                               | A0A480X8T8 | -0.628783 | 17 | 55 | 0.000186 | Oxidoreductase activity                                                                                      |
| Na(+)/H(+) exchange regulatory cofactor NHE-RF        | B6EAV5     | -0.627117 | 1  | 56 | 0.000711 | Negative regulation of blood coagulation; binding, bridging                                                  |
| Vitamin K-dependent protein S                         | A0A5G2R920 | -0.618917 | 15 | 30 | 0.001772 | Ruffle assembly; metal ion binding                                                                           |
| Uncharacterized protein                               | A0A4X1TC08 | -0.616733 | 2  | 43 | 0.0178   | Function unknown                                                                                             |
| Uncharacterized protein                               | A0A287APU9 | -0.59527  | 3  | 5  | 0.000101 | Function unknown                                                                                             |
| Uncharacterized protein                               | A0A4X1W2Y2 | -0.594373 | 15 | 32 | 0.01214  | Regulation of multicellular organismal development;                                                          |
| BZIP domain-containing protein                        | A0A4X1VLW8 | -0.589067 | 2  | 23 | 0.00119  | Double-stranded DNA binding                                                                                  |
| Uncharacterized protein                               | A0A287AXR4 | -0.580111 | 2  | 9  | 0.001667 | Function unknown                                                                                             |
| Uncharacterized protein                               | A0A5G2QST4 | -0.579922 | 1  | 27 | 0.001039 | Function unknown                                                                                             |
| Glutathione transferase                               | Q29057     | -0.576697 | 1  | 59 | 0.002137 | Catalytic activity                                                                                           |
| Triosephosphate isomerase                             | A0A288CFT0 | -0.573473 | 19 | 77 | 0.000588 | Function unknown                                                                                             |
| Fumarylacetoacetase                                   | A0A4X1UNC5 | -0.567782 | 11 | 29 | 0.000886 | Positive regulation of cellular process;                                                                     |
| RanBP2-type domain-containing protein                 | A0A287AD58 | -0.562028 | 1  | 4  | 0.01838  | Transcription regulator activity                                                                             |
| Ankyrin-3 isoform X12                                 | A0A480UC11 | -0.551487 | 15 | 14 | 0.00081  | Function unknown                                                                                             |
| Uncharacterized protein                               | A0A4X1U9G6 | -0.550245 | 3  | 5  | 0.03181  | Function unknown                                                                                             |
| Quinone oxidoreductase                                | F6Q2A5     | -0.549311 | 7  | 23 | 0.003908 | Function unknown                                                                                             |
| Lipocln_cytosolic_FA-bd_dom domain-containing protein | A0A4X1V211 | -0.544069 | 1  | 7  | 0.0046   | Negative regulation of cellular process; retinal binding                                                     |
| Ketimine reductase mu-crystallin                      | F1RPC8     | -0.542448 | 5  | 26 | 0.001233 | Chemical homeostasis; oxidoreductase activity, acting on the CH-NH2 group of donors, NAD or NADP as acceptor |
| Secretagogin                                          | Q06A97     | -0.535653 | 10 | 46 | 0.001982 | Binding                                                                                                      |

|                                                       |            |           |    |    |          |                                                                              |
|-------------------------------------------------------|------------|-----------|----|----|----------|------------------------------------------------------------------------------|
| Uncharacterized protein                               | A0A287A4W1 | -0.53213  | 1  | 9  | 0.02859  | Positive regulation of cellular process;                                     |
| Protein S100                                          | A0A5G2QR31 | -0.53104  | 2  | 23 | 0.0385   | Protein dimerization activity                                                |
| 1,2-dihydroxy-3-keto-5-methylthiopentene dioxxygenase | A0A4X1UJZ2 | -0.526069 | 1  | 54 | 0.000985 | Cation transmembrane transport;                                              |
| ATP synthase subunit a                                | Q1HBH9     | -0.523885 | 2  | 10 | 0.00665  | Organophosphate metabolic process; cation transmembrane transporter activity |
| Creatine kinase                                       | A0A4X1TV43 | -0.518675 | 15 | 60 | 0.000989 | Regulation of nucleotide metabolic process; binding                          |
| Phosphoglycerate mutase                               | A0A287AJQ2 | -0.517577 | 11 | 69 | 0.000793 | Small molecule metabolic process; protein binding                            |
| Ribokinase                                            | A0A5G2RG09 | -0.515072 | 5  | 20 | 0.000592 | Ribonucleotide binding                                                       |
| Perilipin                                             | K4P7U5     | -0.510151 | 9  | 23 | 0.000418 | Small molecule metabolic process;                                            |
| Isocitrate dehydrogenase [NADP]                       | A0A287A8M1 | -0.505866 | 26 | 69 | 0.000683 | Positive regulation of cellular process; isocitrate dehydrogenase (NADP+     |
| Osteopontin                                           | P14287     | -0.505452 | 10 | 40 | 0.0364   | Phosphorus metabolic process; integrin binding                               |
| Glucose-6-phosphate isomerase                         | P08059     | -0.505432 | 24 | 51 | 0.001042 | Organic substance metabolic process; small molecule binding                  |
| Glutathione transferase                               | F1RL37     | -0.504809 | 4  | 16 | 0.01433  | Small molecule metabolic process;                                            |
| Malate dehydrogenase, cytoplasmic                     | A0A5G2QP21 | -0.499727 | 1  | 63 | 0.01003  | Positive regulation of cellular process; organic cyclic compound binding     |
| Dipeptidyl peptidase 4                                | A0A5G2Q7G7 | -0.497271 | 17 | 20 | 0.005219 | Catalytic activity, acting on a protein                                      |
| Adenylate kinase isoenzyme 1                          | A0A286ZQ79 | -0.496369 | 10 | 41 | 0.000282 | Function unknown                                                             |
| 5-oxoprolinase isoform X1                             | A0A480MWT6 | -0.495855 | 1  | 19 | 0.01018  | Positive regulation of cellular process;                                     |
| Phosphoglycerate kinase                               | F1RPH0     | -0.492595 | 30 | 78 | 0.000998 | Negative regulation of cellular process; small molecule binding              |
| Uncharacterized protein                               | A0A4X1TTH9 | -0.491744 | 12 | 82 | 0.000566 | Function unknown                                                             |
| MFS domain-containing protein                         | A0A4X1VJW9 | -0.49092  | 1  | 2  | 0.03072  | Function unknown                                                             |
| Uncharacterized protein                               | A0A4X1W0P5 | -0.489548 | 16 | 9  | 0.000956 | Small molecule metabolic process;                                            |

|                                                        |            |           |    |    |          |                                                                                  |
|--------------------------------------------------------|------------|-----------|----|----|----------|----------------------------------------------------------------------------------|
| Malate dehydrogenase                                   | A0A5G2QFC2 | -0.487374 | 4  | 42 | 0.001696 | Cytoskeleton organization; organic cyclic compound binding                       |
| Uncharacterized protein                                | I3LQD0     | -0.487216 | 5  | 21 | 0.00619  | Binding                                                                          |
| Uncharacterized protein                                | A0A5G2QCC6 | -0.485885 | 7  | 49 | 0.00041  | Function unknown                                                                 |
| Uncharacterized protein                                | A0A5G2QMA5 | -0.484465 | 1  | 20 | 0.008195 | Negative regulation of cellular process;                                         |
| Chloride intracellular channel protein                 | A0A287ADH9 | -0.479114 | 15 | 66 | 0.000353 | Transmembrane transporter activity                                               |
| Protein LBH                                            | A0A481B2K6 | -0.478698 | 2  | 34 | 0.01035  | Unsaturated fatty acid metabolic process;                                        |
| 15-oxoprostaglandin 13-reductase                       | A0A4X1TM83 | -0.477052 | 9  | 36 | 0.000669 | 15-oxoprostaglandin 13-oxidase activity                                          |
| Alpha-aminoadipic semialdehyde dehydrogenase           | A0A481ARR7 | -0.472792 | 25 | 57 | 0.000896 | Function unknown                                                                 |
| Uncharacterized protein                                | A0A4X1ULB5 | -0.465157 | 1  | 1  | 0.02613  | Negative regulation of cellular process;                                         |
| Uncharacterized protein                                | A0A4X1THY8 | -0.464468 | 2  | 8  | 0.006306 | Metabolic process; glutathione binding                                           |
| PKS_ER domain-containing protein                       | A0A4X1U010 | -0.461184 | 1  | 5  | 0.003119 | Protein transport; protein dimerization activity                                 |
| t-SNARE coiled-coil homology domain-containing protein | A0A4X1VQQ8 | -0.460293 | 2  | 20 | 0.01615  | SNARE binding                                                                    |
| Na(+)/H(+) exchange regulatory cofactor NHE-RF         | A0A481BZK7 | -0.459909 | 1  | 56 | 0.02682  | Positive regulation of cellular process; binding, bridging                       |
| Villin-1                                               | A0A480TKM7 | -0.45918  | 30 | 39 | 0.000144 | ATP generation from ADP; peptidase regulator activity                            |
| Fructose-bisphosphate aldolase                         | A0A4X1U602 | -0.458422 | 1  | 69 | 0.006081 | Positive regulation of cellular process; fructose-bisphosphate aldolase activity |
| CCAAT/enhancer-binding protein                         | E5Q8C6     | -0.457309 | 5  | 15 | 0.01147  | Transcription factor activity, sequence-specific DNA binding                     |
| Coiled-coil domain-containing protein 72               | F2Z5V1     | -0.456174 | 2  | 30 | 0.02078  | Function unknown                                                                 |

|                                                           |            |           |    |    |          |                                                                    |
|-----------------------------------------------------------|------------|-----------|----|----|----------|--------------------------------------------------------------------|
| VWFA domain-containing protein                            | A0A5G2RG33 | -0.454652 | 4  | 3  | 0.0342   | Function unknown                                                   |
| Non-specific lipid-transfer protein                       | A0A480SKS9 | -0.454459 | 2  | 19 | 7.40E-05 | Function unknown                                                   |
| LID domain-containing protein                             | A0A4X1TXN0 | -0.451471 | 3  | 10 | 0.002021 | Signal transduction;                                               |
| Protein kinase C delta type                               | I3LR85     | -0.448885 | 1  | 39 | 0.01016  | Positive regulation of cellular process; ribonucleotide binding    |
| COP9 signalosome complex subunit 9                        | I3LEN0     | -0.446648 | 1  | 35 | 0.02383  | Function unknown                                                   |
| UDP-sugar diphosphatase (Fragment)                        | Q865Y9     | -0.444618 | 4  | 30 | 0.001242 | Positive regulation of cellular process;                           |
| 2-iminobutanoate/2-iminopropanoate deaminase              | A0A286ZNH3 | -0.442288 | 9  | 93 | 0.003565 | MRNA binding                                                       |
| Cytochrome c oxidase subunit 7C, mitochondrial            | Q1W0Y2     | -0.436684 | 2  | 29 | 0.01166  | Metabolic process; hydrogen ion transmembrane transporter activity |
| 3-hydroxyacyl-[acyl-carrier-protein] dehydratase          | A0A4X1U8L3 | -0.435149 | 3  | 64 | 0.01657  | Terpenoid biosynthetic process; binding                            |
| Farnesyl pyrophosphate synthase isoform a                 | A0A481DNJ7 | -0.434844 | 1  | 25 | 0.003303 | Geranyltranstransferase activity                                   |
| VPS10 domain-containing protein                           | A0A287A1U0 | -0.433849 | 11 | 13 | 0.01286  | Response to steroid hormone;                                       |
| 3 beta-hydroxysteroid dehydrogenase/Delta 5-->4-isomerase | Q9N119     | -0.43365  | 3  | 10 | 0.005512 | Steroid delta-isomerase activity                                   |
| Uncharacterized protein                                   | A0A4X1TPF2 | -0.432141 | 6  | 14 | 0.001942 | Positive regulation of cellular process;                           |
| F-actin-uncapping protein                                 | A0A480L9D2 | -0.431623 | 1  | 27 | 0.000468 | Function unknown                                                   |
| LRRC16A isoform 1                                         |            |           |    |    |          |                                                                    |

|                                                             |            |           |    |    |          |                                                                            |
|-------------------------------------------------------------|------------|-----------|----|----|----------|----------------------------------------------------------------------------|
| Ribonucleoside-diphosphate reductase                        | A0A5G2QL80 | -0.431519 | 2  | 59 | 0.007466 | Cellular process;                                                          |
| Glycine amidinotransferase, mitochondrial                   | P50441     | -0.431421 | 6  | 22 | 0.01179  | Microtubule cytoskeleton organization; glycine amidinotransferase activity |
| Tubulin alpha chain                                         | A0A480NAY0 | -0.430773 | 3  | 57 | 0.001763 | Ribonucleotide binding                                                     |
| Uncharacterized protein                                     | A0A5G2QGQ5 | -0.429475 | 1  | 41 | 0.02591  | Small molecule metabolic process;                                          |
| Adenosine kinase                                            | A0A287ASQ2 | -0.429458 | 20 | 70 | 0.000279 | Positive regulation of cellular process; adenosine kinase activity         |
| Activated RNA polymerase II transcriptional coactivator p15 | A0A287AUW4 | -0.427913 | 8  | 61 | 6.40E-05 | Regulation of biological process; catalytic activity, acting on DNA        |
| Insulin-like growth factor-binding protein 7 isoform 1      | A0A481CLV1 | -0.42724  | 10 | 51 | 0.01341  | Insulin-like growth factor binding                                         |
| Uncharacterized protein                                     | A0A4X1UJK2 | -0.427218 | 12 | 25 | 0.01799  | Function unknown                                                           |
| Uncharacterized protein                                     | A0A287B8I3 | -0.426349 | 5  | 18 | 0.01353  | Function unknown                                                           |
| Potassium channel tetramerization domain containing 12      | F1RHE6     | -0.42501  | 4  | 16 | 0.001075 | Function unknown                                                           |
| Leydig cell tumor 10 kDa protein homolog                    | F1SD77     | -0.423463 | 7  | 47 | 0.000233 | Function unknown                                                           |
| Protein S100-A13                                            | K9J4R8     | -0.42314  | 5  | 42 | 0.001127 | Signal transduction;                                                       |
| Protein kinase C                                            | A0A287BBY6 | -0.422849 | 1  | 38 | 0.03132  | Small molecule metabolic process; ribonucleotide binding                   |
| Inositol polyphosphate 1-phosphatase isoform X1             | F1SN51     | -0.422821 | 11 | 35 | 0.003251 | Regulation of biological process; inositol phosphate phosphatase activity  |
| Peroxiredoxin-5                                             | A0A5G2R9D6 | -0.421862 | 10 | 75 | 0.000893 | Oxidoreductase activity                                                    |
| NADH-ubiquinone oxidoreductase chain 3                      | B5KN66     | -0.42056  | 1  | 13 | 0.02684  | Oxidoreductase activity                                                    |
| COesterase domain-                                          | A0A4X1T6P2 | -0.420305 | 1  | 63 | 0.007994 | Positive regulation of cellular process;                                   |

|                                                |            |           |    |    |          |                                                                                    |
|------------------------------------------------|------------|-----------|----|----|----------|------------------------------------------------------------------------------------|
| containing protein                             |            |           |    |    |          |                                                                                    |
| Peroxioredoxin-6                               | Q9TSX9     | -0.419427 | 17 | 83 | 0.001948 | Peroxioredoxin activity                                                            |
| Uncharacterized protein                        | A0A5G2RCE3 | -0.418171 | 46 | 27 | 0.001815 | Inositol 1,4,5 trisphosphate binding                                               |
| Protein phosphatase 1 regulatory subunit 14B   | Q8MIK9     | -0.417237 | 3  | 48 | 0.003429 | Glucose metabolic process; protein serine/threonine phosphatase inhibitor activity |
| Aldose 1-epimerase                             | A0A480TMR5 | -0.412892 | 9  | 32 | 0.001497 | Binding                                                                            |
| Uncharacterized protein                        | A0A5G2RKV1 | -0.412651 | 1  | 20 | 0.03449  | Function unknown                                                                   |
| Methyltransf_11 domain-containing protein      | A0A4X1W6X4 | -0.41247  | 1  | 26 | 0.02942  | Function unknown                                                                   |
| Peptidylprolyl isomerase                       | I3LR51     | -0.411175 | 11 | 43 | 0.002514 | Isomerase activity                                                                 |
| Uncharacterized protein                        | A0A4X1T842 | -0.409731 | 25 | 58 | 0.002014 | Function unknown                                                                   |
| Uncharacterized protein                        | A0A287BNG4 | -0.406349 | 6  | 17 | 0.00834  | Peptidase activity                                                                 |
| Uncharacterized protein                        | A0A287AG72 | -0.405239 | 7  | 25 | 0.00111  | Positive regulation of cellular process;                                           |
| Tyrosine-protein phosphatase non-receptor type | A0A5G2QDD3 | -0.404551 | 1  | 48 | 0.01652  | Negative regulation of cellular process; insulin receptor binding                  |
| 39S ribosomal protein L59, mitochondrial       | A0A4X1T8J5 | -0.403347 | 8  | 40 | 0.001932 | Function unknown                                                                   |
| Complex I-MNLL                                 | F1SD73     | -0.40302  | 2  | 34 | 0.001222 | Function unknown                                                                   |
| Uncharacterized protein                        | A0A4X1SSQ0 | -0.402023 | 2  | 5  | 0.001051 | Function unknown                                                                   |
| Transmembrane 4 L6 family member 4             | F1SJP1     | -0.401571 | 1  | 8  | 0.003379 | Function unknown                                                                   |
| 15-oxoprostaglandin 13-reductase               | A0A287B7R3 | -0.401287 | 15 | 57 | 0.001302 | Function unknown                                                                   |
| GRAM domain-containing protein                 | A0A287BMM1 | -0.401    | 2  | 3  | 0.04357  | Function unknown                                                                   |
| Non-specific lipid-transfer                    | D0G7F1     | -0.400355 | 2  | 19 | 0.001096 | Function unknown                                                                   |

|                                        |            |           |    |    |          |                                                                                                        |
|----------------------------------------|------------|-----------|----|----|----------|--------------------------------------------------------------------------------------------------------|
| protein                                |            |           |    |    |          |                                                                                                        |
| Acylphosphatase                        | J9JIK5     | -0.399343 | 2  | 12 | 0.024    | Acylphosphatase activity                                                                               |
| Uncharacterized protein                | A0A5G2QLE5 | -0.399108 | 7  | 9  | 0.00495  | Leukotriene biosynthetic process;                                                                      |
| Microsomal glutathione S-transferase 3 | Q2EN77     | -0.398983 | 3  | 25 | 0.01127  | Cellular biosynthetic process; glutathione peroxidase activity                                         |
| Spermine synthase isoform X1           | K7GPY8     | -0.398757 | 21 | 74 | 0.000671 | Regulation of mRNA metabolic process; catalytic activity                                               |
| CSD_1 domain-containing protein        | A0A4X1VPW4 | -0.398064 | 5  | 62 | 0.004481 | Negative regulation of cellular process; mRNA binding                                                  |
| ATP-dependent dihydroxyacetone kinase  | A0A480YP74 | -0.397405 | 2  | 52 | 0.000575 | Small molecule binding                                                                                 |
| Asparaginyl endopeptidase              | F1SD70     | -0.396942 | 11 | 38 | 0.001487 | Catalytic activity                                                                                     |
| Nicotinate phosphoribosyltransferase   | A0A480KYX1 | -0.395898 | 16 | 43 | 0.002441 | Positive regulation of cellular process;                                                               |
| 14-3-3 protein theta                   | A0A4X1UGF0 | -0.393481 | 9  | 54 | 0.000136 | Small molecule metabolic process; protein binding                                                      |
| Asparaginase-like protein 1            | A0A4X1VNE4 | -0.392228 | 11 | 42 | 0.00258  | Regulation of viral genome replication; hydrolase activity, acting on carbon-nitrogen (but not peptide |
| Peptidyl-prolyl cis-trans isomerase A  | P62936     | -0.392093 | 1  | 76 | 0.001367 | Binding                                                                                                |
| Protein archease                       | A0A4X1VY44 | -0.391691 | 2  | 16 | 0.000305 | Function unknown                                                                                       |
| Beta-lactamase-like protein 2          | F1RU12     | -0.3887   | 14 | 59 | 0.001267 | Reproductive process; zinc ion binding                                                                 |
| AMP-binding domain-containing protein  | A0A4X1W4H3 | -0.387772 | 27 | 66 | 0.003053 | COA-ligase activity                                                                                    |
| Uncharacterized protein                | F1SH42     | -0.38733  | 6  | 19 | 0.02766  | Function unknown                                                                                       |
| DNA helicase                           | A0A480HA17 | -0.386132 | 3  | 8  | 0.04134  | Function unknown                                                                                       |
| Uncharacterized protein                | F1SES5     | -0.38322  | 14 | 28 | 0.000196 | Function unknown                                                                                       |
| Delta-aminolevulinic acid              | A0A481BAE5 | -0.382531 | 10 | 39 | 7.20E-05 | ATP generation from ADP;                                                                               |

|                               |            |           |    |    |          |                                                                                                           |
|-------------------------------|------------|-----------|----|----|----------|-----------------------------------------------------------------------------------------------------------|
| dehydratase                   |            |           |    |    |          |                                                                                                           |
| Phosphoglycerate mutase       | A0A286ZQ31 | -0.382129 | 9  | 38 | 0.0329   | Cellular metabolic process; isomerase activity                                                            |
| NADH-ubiquinone               | T1P3V6     | -0.381783 | 6  | 12 | 0.008396 | Oxidoreductase activity, acting on NAD(P)                                                                 |
| oxidoreductase chain 5        |            |           |    |    |          |                                                                                                           |
| Carboxymethylenebutenolidas   | A0A480VUT1 | -0.380726 | 2  | 40 | 0.000527 | Positive regulation of cellular process;                                                                  |
| e homolog                     |            |           |    |    |          |                                                                                                           |
| USP1-associated factor 1      | A0A4X1TUZ9 | -0.380324 | 13 | 28 | 0.03082  | Protein binding                                                                                           |
| Uncharacterized protein       | A0A4X1UXT4 | -0.379015 | 2  | 20 | 0.001309 | Oxidoreductase activity                                                                                   |
| Urokinase plasminogen         | A0A0B8RSD8 | -0.378512 | 4  | 16 | 0.0353   | Cation transmembrane transport;                                                                           |
| activator surface receptor    |            |           |    |    |          |                                                                                                           |
| ATP synthase protein 8        | Q71K49     | -0.378512 | 2  | 39 | 0.0363   | Transmembrane transporter activity                                                                        |
| Nucleoside diphosphate-linked | A0A4X1TSV9 | -0.378463 | 1  | 39 | 0.00018  | Function unknown                                                                                          |
| moiety X motif 19             |            |           |    |    |          |                                                                                                           |
| Uncharacterized protein       | A0A4X1U8I9 | -0.378433 | 8  | 22 | 0.01004  | Small molecule metabolic process;                                                                         |
| Aminoacylase-1                | P37111     | -0.377821 | 17 | 63 | 0.002884 | Mitochondrial electron transport, NADH to ubiquinone; peptidase activity, acting on L-amino acid peptides |
| NADH dehydrogenase            | A0A480QR88 | -0.377331 | 7  | 53 | 0.006076 | Negative regulation of cellular process; oxidoreductase activity, acting on NAD(P                         |
| [ubiquinone] 1 beta           |            |           |    |    |          |                                                                                                           |
| subcomplex subunit 8,         |            |           |    |    |          |                                                                                                           |
| mitochondrial                 |            |           |    |    |          |                                                                                                           |
| LIM domain and actin-binding  | A0A5G2QDK2 | -0.376528 | 3  | 49 | 0.01122  | Function unknown                                                                                          |
| protein 1                     |            |           |    |    |          |                                                                                                           |
| Beta-1 metal-binding globulin | A0A5G2R5N9 | -0.376009 | 6  | 11 | 0.002634 | Peptide metabolic process;                                                                                |
| GST class-pi                  | M3V836     | -0.375516 | 8  | 75 | 0.001505 | Catalytic activity                                                                                        |
| Aldehyde dehydrogenase        | I6L6E1     | -0.374492 | 1  | 21 | 0.004509 | Regulation of cellular component organization;                                                            |
| Dihydropyrimidinase-related   | G9F6X9     | -0.373856 | 23 | 69 | 0.001038 | Cytoskeletal protein binding                                                                              |

|                                                 |            |           |    |    |          |                                                                 |
|-------------------------------------------------|------------|-----------|----|----|----------|-----------------------------------------------------------------|
| protein 2                                       |            |           |    |    |          |                                                                 |
| Uncharacterized protein                         | F1RSL4     | -0.370593 | 9  | 7  | 0.001693 | Small molecule metabolic process;                               |
| Acyl-coenzyme A oxidase                         | A0A4X1VH96 | -0.370109 | 11 | 22 | 0.003602 | Acyl-CoA oxidase activity                                       |
| Coronin                                         | A0A5G2R8I5 | -0.370078 | 19 | 37 | 0.00094  | Function unknown                                                |
| Uncharacterized protein                         | I3LJU0     | -0.369657 | 5  | 7  | 0.02259  | Cellular metabolic process;                                     |
| D-3-phosphoglycerate dehydrogenase              | A0A480HK41 | -0.369523 | 22 | 48 | 0.00065  | Glycosyl compound biosynthetic process; binding                 |
| Hypoxanthine-guanine phosphoribosyltransferase  | Q45FY6     | -0.369405 | 2  | 67 | 0.000323 | Positive regulation of cellular process; small molecule binding |
| Nucleoside diphosphate kinase (Fragment)        | A0A481D0P1 | -0.366904 | 7  | 60 | 0.02676  | G-quadruplex DNA binding                                        |
| Uncharacterized protein                         | A0A287BL36 | -0.366077 | 2  | 15 | 0.04863  | Function unknown                                                |
| Na(+)/H(+) exchange regulatory cofactor NHE-RF  | F6PYE5     | -0.365401 | 18 | 56 | 0.00281  | Function unknown                                                |
| Aldehyde oxidase 1                              | A0A287A5W9 | -0.365293 | 8  | 9  | 0.003035 | Function unknown                                                |
| Heme-binding protein 1                          | A0A286ZSH3 | -0.364906 | 12 | 67 | 0.000734 | Heterocyclic compound binding                                   |
| SMB domain-containing protein                   | I3L9E7     | -0.364027 | 6  | 17 | 0.04134  | Function unknown                                                |
| ADP-ribosyl cyclase/cyclic ADP-ribose hydrolase | A0A4X1VFI7 | -0.361585 | 7  | 27 | 0.003481 | Phosphorus metabolic process;                                   |
| UMP-CMP kinase                                  | Q29561     | -0.360476 | 9  | 54 | 5.90E-05 | Negative regulation of vascular permeability; anion binding     |
| Uncharacterized protein                         | F1SNE5     | -0.360176 | 7  | 38 | 0.008498 | Positive regulation of cellular process; protein binding        |
| Moesin                                          | A0A4X1VJV5 | -0.357329 | 28 | 58 | 0.008235 | Receptor binding                                                |
| Doublecortin domain-containing protein 2        | A0A480EUM6 | -0.356438 | 2  | 28 | 0.001429 | Function unknown                                                |
| Carbonyl reductase 3                            | A0A0K1TQQ7 | -0.356221 | 15 | 70 | 0.002014 | Oxidoreductase activity                                         |

|                                                     |            |           |    |    |          |                                                                 |
|-----------------------------------------------------|------------|-----------|----|----|----------|-----------------------------------------------------------------|
| PDZ domain-containing<br>protein GIPC2 isoform 1    | A0A287BNZ1 | -0.354778 | 12 | 40 | 0.01202  | Binding                                                         |
| Cytochrome P450                                     | A7KZR2     | -0.354691 | 2  | 46 | 0.01894  | Regulation of biological process; oxidoreductase activity       |
| GTP cyclohydrolase 1<br>feedback regulatory protein | A0A4X1UVQ7 | -0.353935 | 2  | 50 | 0.001424 | Function unknown                                                |
| Uncharacterized protein                             | A0A286ZRK0 | -0.353695 | 1  | 48 | 0.004348 | Function unknown                                                |
| N-myc downstream-regulated<br>gene 1 protein        | A0A4X1SPG7 | -0.352586 | 12 | 53 | 0.005601 | Regulation of cellular protein metabolic process;               |
| M20_dimer domain-containing<br>protein              | F1S0E1     | -0.351764 | 3  | 9  | 0.01083  | Peptidase activity, acting on L-amino acid peptides             |
| FERM domain-containing<br>protein 4B                | A0A287B6L4 | -0.351271 | 1  | 1  | 0.02184  | Positive regulation of cellular process;                        |
| Stathmin                                            | Q6DUB7     | -0.350542 | 8  | 46 | 0.004706 | Positive regulation of cellular process; protein binding        |
| Uncharacterized protein                             | I3LB77     | -0.350338 | 5  | 17 | 0.02929  | MRNA 3'-UTR binding                                             |
| Intraflagellar transport protein<br>27 homolog      | A0A480Z612 | -0.34918  | 9  | 59 | 0.002595 | Function unknown                                                |
| Hepatoma-derived growth<br>factor-related protein 2 | A0A0B8RTM7 | -0.34882  | 13 | 19 | 0.004738 | Lipid droplet formation;                                        |
| Seipin                                              | A0A4X1VK87 | -0.348695 | 1  | 5  | 0.0481   | Lipid binding                                                   |
| Phosphodiesterase                                   | A0A481A4V1 | -0.347988 | 7  | 16 | 0.04711  | Function unknown                                                |
| Uncharacterized protein                             | A0A286ZSE5 | -0.347469 | 1  | 37 | 0.02082  | Protein metabolic process;                                      |
| Alpha-1-microglobulin                               | A0A480P2R0 | -0.347466 | 2  | 7  | 0.01708  | Regulation of biological process; protein dimerization activity |
| CARD domain-containing<br>protein                   | A0A4X1UPG3 | -0.347257 | 4  | 32 | 0.007917 | Function unknown                                                |
| Protein XRP2                                        | A0A480E0X6 | -0.34678  | 6  | 18 | 0.004732 | Binding                                                         |
| Arginyl-tRNA--protein                               | A0A480M856 | -0.346753 | 5  | 17 | 0.008626 | Function unknown                                                |

|                                                                           |            |           |    |    |          |                                                                                                        |
|---------------------------------------------------------------------------|------------|-----------|----|----|----------|--------------------------------------------------------------------------------------------------------|
| transferase 1                                                             |            |           |    |    |          |                                                                                                        |
| Hepatocyte nuclear factor 1-beta                                          | A0A4X1T4P3 | -0.345726 | 1  | 24 | 0.02009  | Signal transduction;                                                                                   |
| Uncharacterized protein                                                   | A0A287B0I3 | -0.345709 | 8  | 54 | 0.002706 | Protein binding                                                                                        |
| Aldolase_II domain-containing protein                                     | A0A4X1TEQ8 | -0.345664 | 15 | 27 | 0.02353  | Structural molecule activity                                                                           |
| Epididymal-specific lipocalin-9 isoform X1                                | A0A287A022 | -0.344294 | 1  | 5  | 0.03129  | Negative regulation of cellular process; binding                                                       |
| Uveal autoantigen with coiled-coil domains and ankyrin repeats isoform X3 | A0A481D4V5 | -0.343429 | 1  | 9  | 0.02512  | Positive regulation of cellular process;                                                               |
| Interferon regulatory factor                                              | A0A5S6GDS9 | -0.340442 | 5  | 24 | 0.006196 | Unsaturated fatty acid metabolic process; transcription factor activity, sequence-specific DNA binding |
| Aldo-keto reductase                                                       | Q2TJA5     | -0.340027 | 16 | 70 | 7.50E-05 | Catalytic activity                                                                                     |
| Uncharacterized protein                                                   | I3LJJ4     | -0.339319 | 14 | 60 | 0.00134  | Function unknown                                                                                       |
| 2,4-dienoyl-CoA reductase 1                                               | D6QST6     | -0.337855 | 12 | 44 | 0.001467 | Positive regulation of cellular process;                                                               |
| Macrophage migration inhibitory factor                                    | P80928     | -0.335845 | 3  | 37 | 0.003433 | Dopachrome isomerase activity                                                                          |
| UDENN domain-containing protein                                           | I3LCU0     | -0.335461 | 2  | 2  | 0.006546 | Function unknown                                                                                       |
| Transcription factor jun-D                                                | A0A4X1UAA4 | -0.335168 | 3  | 19 | 0.0142   | Function unknown                                                                                       |
| Uncharacterized protein                                                   | A0A4X1UK48 | -0.334823 | 10 | 19 | 0.02741  | Translation; RNA binding                                                                               |
| 60S acidic ribosomal protein P1                                           | A0A4X1T568 | -0.333922 | 4  | 96 | 0.04705  | Enzyme regulator activity                                                                              |
| Protein-ribulosamine 3-kinase                                             | A0A4X1U3C7 | -0.333868 | 4  | 20 | 0.0446   | Negative regulation of cellular process;                                                               |
| Tubulin beta chain                                                        | A0A480UV25 | -0.331949 | 3  | 79 | 0.03349  | Anion binding                                                                                          |

|                                                                      |            |           |    |    |          |                                                                                |
|----------------------------------------------------------------------|------------|-----------|----|----|----------|--------------------------------------------------------------------------------|
| CXXC motif containing zinc binding protein                           | F1S765     | -0.330612 | 9  | 74 | 0.000435 | Zinc ion binding                                                               |
| Phosphorylase b kinase regulatory subunit                            | A0A4X1TYG1 | -0.330364 | 5  | 6  | 0.007787 | Function unknown                                                               |
| Cystatin-B                                                           | A0A4X1TD05 | -0.328578 | 3  | 24 | 0.01215  | Negative regulation of cellular process;                                       |
| Rab GDP dissociation inhibitor                                       | I3L893     | -0.328292 | 15 | 64 | 0.004224 | Enzyme regulator activity                                                      |
| Rab9 effector protein with kelch motifs isoform X1                   | A0A480XCZ0 | -0.327652 | 8  | 31 | 0.002356 | Cellular metabolic process;                                                    |
| NEDD8                                                                | A0A4X1SPV9 | -0.327639 | 3  | 32 | 0.00901  | Positive regulation of cellular process; ubiquitin-like protein ligase binding |
| 4a-hydroxytetrahydrobiopterin dehydratase                            | A0A4X1TCL6 | -0.326302 | 3  | 37 | 0.01391  | Phenylalanine 4-monooxygenase activity                                         |
| Uncharacterized protein                                              | I3LU51     | -0.325978 | 1  | 37 | 0.01667  | Function unknown                                                               |
| Methylthioribulose-1-phosphate dehydratase                           | A0A4X1SQ75 | -0.32458  | 14 | 68 | 0.000778 | Function unknown                                                               |
| Solute carrier family 37 (Glucose-6-phosphate transporter), member 4 | K9IVK4     | -0.323228 | 5  | 15 | 0.003125 | Function unknown                                                               |
| mRNA decay activator protein ZFP36L2 (Fragment)                      | A0A480Z3B2 | -0.323004 | 9  | 19 | 0.032    | Ion binding                                                                    |
| Uncharacterized protein                                              | F1RGT4     | -0.321767 | 3  | 43 | 0.02293  | Function unknown                                                               |
| Ubiquitin carboxyl-terminal hydrolase                                | A0A287B8P7 | -0.320536 | 3  | 6  | 0.002042 | Function unknown                                                               |
| Myosin_tail_1 domain-containing protein                              | A0A287AXZ5 | -0.319969 | 48 | 43 | 0.000903 | Regulation of secretion by cell; motor activity                                |
| Uncharacterized protein                                              | A0A287A0S1 | -0.319833 | 7  | 33 | 0.00256  | Phosphatidylinositol binding                                                   |
| Arpin                                                                | I3LLA5     | -0.319553 | 5  | 32 | 0.004924 | Regulation of nitrogen compound metabolic process;                             |

|                                                              |            |           |    |    |          |                               |
|--------------------------------------------------------------|------------|-----------|----|----|----------|-------------------------------|
| ATP-binding cassette sub-family F member 1 isoform a         | A0A480PQG3 | -0.319493 | 2  | 46 | 0.01028  | Ribonucleotide binding        |
| Cytochrome c oxidase subunit 6C                              | A0A4X1TXH1 | -0.31939  | 5  | 53 | 0.000105 | Oxidoreductase activity       |
| Microtubule-actin cross-linking factor 1 isoform X9          | A0A480X1F7 | -0.319279 | 1  | 43 | 0.007265 | Function unknown              |
| Uncharacterized protein                                      | A0A4X1VVM2 | -0.318648 | 4  | 49 | 0.03181  | Function unknown              |
| Protein-serine O-palmitoleoyltransferase porcupine isoform A | A0A480H9U3 | -0.318461 | 1  | 2  | 0.01995  | Function unknown              |
| Tetratricopeptide repeat protein 38                          | A0A4X1W3T6 | -0.318274 | 7  | 22 | 0.01275  | Function unknown              |
| Sugar transporter SWEET                                      | A0A4X1W094 | -0.31813  | 1  | 4  | 0.02112  | Signal transduction;          |
| LIM zinc-binding domain-containing protein                   | A0A4X1TWY1 | -0.317759 | 3  | 31 | 0.001044 | Heterocyclic compound binding |
| Uncharacterized protein                                      | I3LLQ7     | -0.317397 | 2  | 15 | 0.006309 | Function unknown              |
| LRRcap domain-containing protein                             | A0A4X1T7J4 | -0.316314 | 10 | 36 | 0.000586 | Function unknown              |
| PKD domain-containing protein                                | A0A286ZJF6 | -0.316025 | 7  | 13 | 0.0233   | Function unknown              |
| 39S rib                                                      | A0A4X1UFR4 | -0.314965 | 2  | 21 | 0.01324  | Function unknown              |
| Dimethylargininase                                           | A0A287B1T7 | -0.314855 | 9  | 39 | 0.02     | Function unknown              |
| Uncharacterized protein                                      | A0A4X1UEJ0 | -0.313322 | 1  | 36 | 0.001966 | MRNA processing;              |
| Zinc finger Ran-binding domain-containing protein 2          | A0A5S6FXB9 | -0.312628 | 11 | 34 | 0.000698 | RNA binding                   |
| Histone deacetylase                                          | A0A287BQF9 | -0.31203  | 2  | 2  | 0.01073  | Protein catabolic process;    |

|                                                       |            |           |    |    |          |                                                                                          |
|-------------------------------------------------------|------------|-----------|----|----|----------|------------------------------------------------------------------------------------------|
| Lys                                                   | A0A287B836 | -0.311839 | 1  | 10 | 0.01384  | Cellular modified amino acid metabolic process; protein binding                          |
| Glutathione transferase                               | A0A4X1TGN8 | -0.311547 | 3  | 27 | 0.03108  | Function unknown                                                                         |
| 3-ketoacyl-CoA thiolase,<br>mitochondrial             | D0G0B3     | -0.311267 | 17 | 71 | 0.000508 | Anatomical structure development;                                                        |
| Uncharacterized protein                               | A0A4X1V9E1 | -0.31075  | 24 | 59 | 0.002265 | Macromolecule metabolic process; macromolecular complex binding                          |
| Proteasome subunit beta type-<br>7                    | A1XQU1     | -0.309783 | 7  | 39 | 0.009788 | Intermediate filament-based process; peptidase activity, acting on L-amino acid peptides |
| Dystonin isoform X21                                  | A0A480SGQ6 | -0.308739 | 2  | 31 | 0.02895  | Nucleoside phosphate metabolic process; protein binding                                  |
| Propionate--CoA ligase                                | A0A480Y097 | -0.308192 | 7  | 12 | 0.000728 | Ligase activity                                                                          |
| Stearoyl-CoA 9-desaturase                             | F6Q284     | -0.307807 | 9  | 24 | 0.03895  | Function unknown                                                                         |
| UBC core domain-containing<br>protein                 | A0A5G2RGI4 | -0.307711 | 4  | 58 | 0.001254 | Function unknown                                                                         |
| Superoxide dismutase [Cu-Zn]                          | I3LUD1     | -0.307703 | 5  | 29 | 0.01039  | Carboxylic acid catabolic process; oxidoreductase activity                               |
| Alcohol dehydrogenase<br>NADP(+)                      | A0A480PFL9 | -0.307536 | 20 | 73 | 0.001441 | Positive regulation of cellular process; allyl-alcohol dehydrogenase activity            |
| Cystathionine gamma-lyase                             | F1S9N9     | -0.307278 | 17 | 52 | 0.002712 | Negative regulation of cellular process; small molecule binding                          |
| PWWP domain-containing<br>protein                     | A0A4X1UJT9 | -0.30443  | 5  | 28 | 0.004086 | Protein binding                                                                          |
| Uncharacterized protein                               | A0A287B3Q3 | -0.303128 | 2  | 1  | 0.006746 | Function unknown                                                                         |
| Cytochrome c oxidase subunit                          | A0A4X1TG97 | -0.302959 | 7  | 73 | 0.006029 | Function unknown                                                                         |
| Uncharacterized protein                               | F1SR85     | -0.302472 | 17 | 30 | 0.002697 | Response to organic substance;                                                           |
| Uncharacterized protein                               | I3LNG8     | -0.301398 | 1  | 65 | 0.04209  | Binding                                                                                  |
| AdoHcyase_NAD domain-<br>containing protein           | A0A286ZSJ9 | -0.30099  | 2  | 26 | 0.001114 | Signal transduction;                                                                     |
| Alpha-carbonic anhydrase<br>domain-containing protein | A0A4X1SLG9 | -0.30092  | 7  | 35 | 0.007198 | Positive regulation of cellular process; hydro-lyase activity                            |

|                                                         |            |           |    |    |          |                                                                  |
|---------------------------------------------------------|------------|-----------|----|----|----------|------------------------------------------------------------------|
| Serine/threonine-protein ph                             | P67776     | -0.29966  | 1  | 54 | 0.000352 | Protein phosphatase 2A binding                                   |
| Uncharacterized protein                                 | A0A287A3A3 | -0.299088 | 11 | 26 | 0.01543  | Function unknown                                                 |
| 14-3-3 protein beta/alpha<br>(Fragment)                 | A0A480LG53 | -0.298991 | 6  | 43 | 0.000558 | Insulin-like growth factor binding                               |
| NAD(P)H dehydrogenase<br>quinone 1                      | F1S395     | -0.298987 | 15 | 43 | 0.000379 | Positive regulation of cellular process; oxidoreductase activity |
| ENTH domain-containing<br>protein                       | A0A4X1U6J4 | -0.297517 | 1  | 43 | 0.03508  | Low-density lipoprotein particle receptor binding                |
| Uncharacterized protein                                 | A0A4X1SD92 | -0.296612 | 7  | 26 | 0.003171 | Signal transduction;                                             |
| Alpha-actinin-4 isoform 1                               | A0A480HSJ4 | -0.295963 | 3  | 68 | 0.02896  | Protein binding                                                  |
| Protein HID1 isoform X1                                 | A0A286ZYE1 | -0.295357 | 14 | 25 | 0.001474 | Function unknown                                                 |
| Uncharacterized protein                                 | A0A4X1UXN6 | -0.294897 | 14 | 10 | 0.006181 | Function unknown                                                 |
| Uncharacterized protein                                 | A0A287AIZ9 | -0.294619 | 12 | 21 | 0.01448  | Protein transport;                                               |
| ADP-rib                                                 | F1SPB1     | -0.29382  | 2  | 6  | 0.002943 | Enzyme activator activity                                        |
| Anaphase-promoting complex<br>subunit 4                 | I3LFB6     | -0.293291 | 3  | 5  | 0.01304  | Function unknown                                                 |
| Methyltransf_11 domain-<br>containing protein           | A0A287ATV3 | -0.292708 | 4  | 15 | 0.000334 | Function unknown                                                 |
| Uncharacterized protein                                 | I3LV99     | -0.292255 | 63 | 40 | 0.000458 | Function unknown                                                 |
| Retinal dehydrogenase 1                                 | I3LRS5     | -0.291963 | 29 | 75 | 0.001811 | Regulation of biological process;                                |
| Peroxiredoxin-2                                         | A0A287AJ76 | -0.290557 | 10 | 59 | 0.002314 | Oxidoreductase activity                                          |
| Beta-hex                                                | A0A4X1SN58 | -0.290186 | 14 | 28 | 0.009624 | Function unknown                                                 |
| Uncharacterized protein                                 | A0A4X1W0G3 | -0.290106 | 5  | 44 | 0.01259  | Regulation of biological process;                                |
| Rho guanine nucleotide<br>exchange factor 18 isoform X6 | A0A286ZWT3 | -0.289858 | 7  | 11 | 0.01262  | Binding                                                          |
| Uncharacterized protein                                 | A0A286ZMY1 | -0.288919 | 6  | 6  | 0.01225  | Function unknown                                                 |

|                                                                      |            |           |    |    |          |                                                          |
|----------------------------------------------------------------------|------------|-----------|----|----|----------|----------------------------------------------------------|
| COMM domain-containing protein 1                                     | A0A4X1WCT2 | -0.288754 | 3  | 27 | 0.003326 | Function unknown                                         |
| Uncharacterized protein                                              | A0A4X1UHE2 | -0.288496 | 9  | 36 | 0.001105 | Function unknown                                         |
| Procollagen-lysine 5-dioxygenase                                     | F1SKE2     | -0.28793  | 33 | 43 | 0.000387 | Function unknown                                         |
| Ensconsin isoform 3                                                  | A0A480SUG5 | -0.286855 | 12 | 19 | 0.006653 | Covalent chromatin modification;                         |
| Protein dpy-30 homolog isoform 1                                     | F2Z5F7     | -0.286744 | 4  | 47 | 0.006445 | Protein dimerization activity                            |
| UBC core domain-containing protein                                   | A0A5G2RDX3 | -0.286304 | 7  | 65 | 0.000984 | Binding                                                  |
| 39S rib                                                              | A0A5G2QIA8 | -0.286129 | 8  | 47 | 0.009369 | Function unknown                                         |
| Transaldolase                                                        | A0A287BQ72 | -0.285256 | 12 | 30 | 0.01058  | Function unknown                                         |
| Glyceraldehyde-3-ph                                                  | A0A4X1TLU8 | -0.284229 | 1  | 12 | 0.0124   | Negative regulation of cellular process;                 |
| 14-3-3 protein zeta/delta                                            | A0A480PLY3 | -0.283971 | 10 | 57 | 0.000104 | Cadherin binding                                         |
| Gamma-glutamylcyclotransferase                                       | A0A4X1T868 | -0.283782 | 9  | 49 | 0.004633 | Gamma-glutamylcyclotransferase activity                  |
| RELT-like protein 1                                                  | F1S4K9     | -0.283123 | 5  | 30 | 0.001757 | DNA metabolic process;                                   |
| S                                                                    | A0A480MDH4 | -0.282382 | 2  | 23 | 0.01873  | Phosphorus metabolic process;                            |
| Bifunctional UDP-N-acetylgluc                                        | A0A480TMZ9 | -0.282209 | 14 | 23 | 0.000913 | Phosphotransferase activity, alcohol group as acceptor   |
| 2-ph                                                                 | A0A480R622 | -0.282087 | 23 | 69 | 0.00122  | MRNA processing;                                         |
| AdoHcyase_NAD domain-containing protein                              | A0A5G2QQD1 | -0.281702 | 10 | 42 | 0.000297 | Positive regulation of cellular process; protein binding |
| Myotrophin                                                           | K9IVW4     | -0.280889 | 6  | 57 | 0.003858 | Oxidation-reduction process;                             |
| NADH dehydrogenase [ubiquinone] iron-sulfur protein 4, mitochondrial | A0A5G2QZZ2 | -0.28049  | 3  | 22 | 0.0388   | Oxidoreductase activity                                  |

|                                                  |            |           |    |    |          |                                                                      |
|--------------------------------------------------|------------|-----------|----|----|----------|----------------------------------------------------------------------|
| Armadillo repeat-containing protein 10 isoform b | I3LLX9     | -0.280353 | 8  | 47 | 0.0142   | Peptide metabolic process;                                           |
| Glutathione S-transferase kappa                  | F1SRV4     | -0.280317 | 10 | 50 | 0.000738 | Disulfide oxidoreductase activity                                    |
| Oxysterol-binding protein                        | A0A4X1UAF6 | -0.27994  | 6  | 13 | 0.005616 | Positive regulation of cellular component biogenesis;                |
| Uncharacterized protein                          | A0A4X1V5D3 | -0.279128 | 1  | 34 | 0.0145   | GTPase regulator activity                                            |
| 1,4-alpha-glucan branching enzyme                | A0A480PP98 | -0.278886 | 15 | 29 | 0.008577 | Sulfur compound metabolic process;                                   |
| Rhodanese domain-containing protein              | A0A4X1VRY9 | -0.278842 | 7  | 83 | 5.00E-05 | Primary metabolic process; catalytic activity                        |
| N-acetylneuraminic acid synthase                 | D0G780     | -0.2787   | 14 | 52 | 0.005312 | Regulation of biological process;                                    |
| Peroxiredoxin-1                                  | A0A286ZND5 | -0.278199 | 10 | 64 | 0.000405 | Chromosome organization; oxidoreductase activity                     |
| Cohesin loading complex subunit SCC4 homolog     | A0A4X1U555 | -0.277883 | 4  | 12 | 0.000566 | Positive regulation of cellular process; double-stranded DNA binding |
| Mitochondrial fission 1 protein                  | A0A287ADK7 | -0.277162 | 6  | 34 | 0.005345 | Positive regulation of cellular process;                             |
| Dynein light chain Tctex-type 1                  | B8Y650     | -0.276979 | 2  | 30 | 8.70E-05 | Nucleoside-triphosphatase activity                                   |
| IFT81_CH domain-containing protein               | A0A5G2QXF1 | -0.276575 | 5  | 7  | 0.02051  | Function unknown                                                     |
| Kelch-like protein 14                            | F1SAK5     | -0.276079 | 4  | 8  | 0.00103  | Function unknown                                                     |
| Erythrocyte membrane protein band 4.1 like 4A    | I3LA05     | -0.276033 | 2  | 4  | 0.02506  | Function unknown                                                     |
| Aminomethyltransferase                           | A0A5G2RKE1 | -0.275887 | 5  | 16 | 0.02581  | Protein catabolic process;                                           |
| Cathepsin D                                      | P00795     | -0.275814 | 1  | 38 | 0.02072  | Aspartic-type endopeptidase activity                                 |
| Immortalization up-regulated protein             | A0A480XPD4 | -0.275789 | 2  | 12 | 0.04449  | Function unknown                                                     |

|                                                           |            |           |    |    |          |                                                                     |
|-----------------------------------------------------------|------------|-----------|----|----|----------|---------------------------------------------------------------------|
| 5'-deoxynucleotidase HDDC2                                | F1S2V3     | -0.275682 | 9  | 61 | 0.000612 | Methylation; 5'-deoxynucleotidase activity                          |
| Thiopurine S-methyltransferase                            | A0A481DB59 | -0.275546 | 2  | 74 | 0.00314  | Negative regulation of cellular process; methyltransferase activity |
| Ph                                                        | A0A480TQY6 | -0.274743 | 10 | 12 | 0.000433 | SH3 domain binding                                                  |
| PWWP domain-containing protein                            | A0A4X1VZD7 | -0.274181 | 16 | 61 | 0.00033  | Function unknown                                                    |
| COMM domain-containing protein                            | A0A286ZXE0 | -0.274044 | 4  | 47 | 0.01195  | Function unknown                                                    |
| Tropomy                                                   | A0A287B5N7 | -0.27358  | 9  | 63 | 0.006347 | Regulation of translation;                                          |
| Citrate hydro-lyase                                       | A0A4X1UMC0 | -0.273565 | 36 | 51 | 0.001354 | Metal cluster binding                                               |
| 6-ph                                                      | A0A480YSA5 | -0.273101 | 22 | 56 | 0.000334 | Function unknown                                                    |
| LisH domain-containing protein ARMC9                      | A0A480YVZ9 | -0.272983 | 2  | 3  | 0.006966 | Function unknown                                                    |
| Urokinase-type plasminogen activator                      | A0A286ZXK2 | -0.272819 | 9  | 24 | 0.03093  | Positive regulation of cellular process;                            |
| AP-1 complex subunit gamma                                | A0A5K1VTT2 | -0.272774 | 28 | 43 | 0.002358 | Decidualization; protein binding                                    |
| Cathepsin B                                               | B2CNZ7     | -0.272538 | 10 | 41 | 0.01872  | Catalytic activity, acting on a protein                             |
| PH domain-containing protein                              | A0A5G2R3Q3 | -0.271426 | 2  | 4  | 0.02066  | Protein metabolic process;                                          |
| Glutaredoxin domain-containing protein                    | A0A4X1SD79 | -0.271117 | 2  | 26 | 0.006196 | Disulfide oxidoreductase activity                                   |
| F-BAR domain only protein 2                               | A0A5G2R436 | -0.269438 | 6  | 10 | 0.001239 | Reproductive process;                                               |
| Acyl-CoA synthetase long-chain family member 4 (Fragment) | A6YQV5     | -0.269122 | 1  | 38 | 0.01074  | COA-ligase activity                                                 |
