# Supplementary material for: Comparative Proteomic Analysis Reveals Mx1 Inhibits Senecavirus A Replication in PK-15 Cells by Interacting with the Capsid Proteins VP1, VP2 and VP3
Source: MDPI journal article supplement (doi:10.3390/v14050863), 2022-04-21
Supplement: s1 [file s1]

**Supplementary Table S1 The differentially expressed proteins identified by TMT labeling coupled with LC-MS/MS analysis of PK-15 cells in response to SVA infection at 12 hpi**

| Protein name                                                                  | Uniport<br>accession No. | Log <sub>2</sub> ratios<br>(infection/control) | peptides | Sequence<br>coverage<br>(%) | P-values | functions                                                                                 |
|-------------------------------------------------------------------------------|--------------------------|------------------------------------------------|----------|-----------------------------|----------|-------------------------------------------------------------------------------------------|
| <b>Upregulated proteins in PK-15-infected cells (a total of 314 proteins)</b> |                          |                                                |          |                             |          |                                                                                           |
| Genome polyprotein                                                            | A0A5C2GZI4               | 2.392431                                       | 1        | 39                          | 0.000729 | Function unknown                                                                          |
| Interferon-induced GTP-<br>binding protein Mx1                                | A0A4X1TKB5               | 1.536855                                       | 6        | 78                          | 0.00925  | Immune effector process; negative regulation of viral process                             |
| Inflammatory response protein<br>6                                            | A0A287B6T9               | 1.486117                                       | 14       | 44                          | 0.007366 | T cell differentiation; negative regulation of viral process                              |
| Genome polyprotein                                                            | A0A649YC94               | 1.469757                                       | 1        | 30                          | 0.004355 | Function unknown                                                                          |
| Interferon-induced GTP-<br>binding protein Mx2                                | A0A480HPX5               | 1.421313                                       | 26       | 54                          | 0.00044  | Small molecule binding, establishment of localization in cell                             |
| 2'-5' oligoadenylate synthase                                                 | Q56VQ1                   | 1.247479                                       | 30       | 54                          | 0.002377 | Ribonucleotide binding                                                                    |
| Uncharacterized protein                                                       | A0A5G2RJF6               | 1.218727                                       | 1        | 1                           | 0.000446 | Function unknown                                                                          |
| Tumor-associated calcium<br>signal transducer 2                               | F1S7A4                   | 1.200562                                       | 8        | 34                          | 0.006537 | Regulation of stem cell differentiation; positive regulation of stem cell differentiation |
| Interferon-stimulated protein<br>60                                           | F1SCY2                   | 1.114459                                       | 14       | 41                          | 0.002878 | Protein binding, immune effector process                                                  |
| C-C motif chemokine<br>(Fragment)                                             | A1YM33                   | 1.110968                                       | 3        | 47                          | 0.01546  | Catalytic activity, positive regulation of protein phosphorylation                        |
| Interferon-stimulated protein<br>56                                           | J7FIC7                   | 1.107499                                       | 30       | 64                          | 0.002542 | Regulation of defense response to virus, regulation of response to exteRNAI stimulus      |

|                                                                                      |            |          |    |    |          |                                                                                       |
|--------------------------------------------------------------------------------------|------------|----------|----|----|----------|---------------------------------------------------------------------------------------|
| Interferon-induced protein with tetratricopeptide repeats 2                          | K9J6I9     | 1.069138 | 18 | 34 | 0.003941 | Cellular response to stimulus, response to cytokine                                   |
| DNA topoisomerase I                                                                  | I3LTP0     | 1.052397 | 1  | 2  | 0.03377  | Function unknown                                                                      |
| mRNA-capping enzyme                                                                  | A0A4X1VEE3 | 1.01955  | 3  | 7  | 0.02165  | Function unknown                                                                      |
| Genome polyprotein                                                                   | A0A6B9QIJ0 | 1.014207 | 1  | 30 | 0.000258 | Function unknown                                                                      |
| RNA helicase                                                                         | A8CYB8     | 1.000579 | 31 | 41 | 0.002151 | Helicase activity, regulation of locomotion                                           |
| Uncharacterized protein                                                              | A0A287A9J8 | 0.985966 | 1  | 8  | 0.000852 | Function unknown                                                                      |
| TLDC domain-containing protein                                                       | I3LMG2     | 0.985906 | 1  | 45 | 0.00663  | Function unknown                                                                      |
| G domain-containing protein                                                          | F1S9T2     | 0.954928 | 1  | 39 | 0.001392 | GTP binding                                                                           |
| Arf-GAP with Rho-GAP domain, ANK repeat and PH domain-containing protein 1 isoform c | A0A481BP67 | 0.95051  | 1  | 10 | 0.01857  | Function unknown                                                                      |
| Protein PML isoform 2                                                                | A0A480JXC7 | 0.946937 | 2  | 50 | 0.02126  | Function unknown                                                                      |
| FIP-RBD domain-containing protein                                                    | A0A4X1UDM9 | 0.937329 | 1  | 32 | 0.02466  | Function unknown                                                                      |
| Receptor-transporting protein 4                                                      | A0A287B9T3 | 0.934535 | 5  | 12 | 0.006303 | Function unknown                                                                      |
| Ubiquitin-like modifier                                                              | A0A287AB58 | 0.930694 | 6  | 50 | 0.002502 | Integrin binding; intracellular organelle                                             |
| IRF tryptophan pentad repeat domain-containing protein                               | A0A5G2RH09 | 0.930143 | 6  | 20 | 0.004793 | Transcription regulator activity                                                      |
| GFO_IDH_MocA domain-containing protein                                               | A0A4X1UEI6 | 0.922326 | 1  | 2  | 0.02394  | Oxidoreductase activity                                                               |
| PH domain-containing protein                                                         | A0A287BS42 | 0.902609 | 1  | 1  | 0.04178  | Integrin-mediated signaling pathway, cellular process; regulation of cellular process |
| Urokinase-type plasminogen                                                           | A0A286ZXK2 | 0.902583 | 9  | 24 | 0.00041  | Function unknown                                                                      |

|                                                 |            |          |    |    |          |                                                                            |
|-------------------------------------------------|------------|----------|----|----|----------|----------------------------------------------------------------------------|
| activator                                       |            |          |    |    |          |                                                                            |
| Protein-serine/threonine phosphatase            | A0A4X1U1Y2 | 0.901906 | 1  | 1  | 0.04074  | Function unknown                                                           |
| Uncharacterized protein                         | A0A287B4N8 | 0.884001 | 5  | 40 | 0.008604 | Function unknown                                                           |
| Transmembrane protein 147                       | A0A4X1TJ50 | 0.871487 | 2  | 13 | 0.005086 | Macromolecular complex, organelle membrane, integral component of membrane |
| Noelin-2 isoform 2                              | A0A480XA75 | 0.862249 | 1  | 2  | 0.03464  | Extrinsic component of plasma membrane; protein localization               |
| Uncharacterized protein                         | A0A287B916 | 0.861888 | 1  | 2  | 0.03854  | Heterocyclic compound binding                                              |
| 2',3'-cyclic-nucleotide 3'-phosphodiesterase    | A0A287A9L8 | 0.86153  | 26 | 59 | 0.004682 | Binding                                                                    |
| Uncharacterized protein                         | A0A4X1SEB3 | 0.858628 | 13 | 24 | 0.002072 | Function unknown                                                           |
| ANK_REP_REGION domain-containing protein        | A0A4X1U612 | 0.852998 | 1  | 14 | 0.01982  | Function unknown                                                           |
| Kelch-like protein 36                           | A0A480YWF8 | 0.852718 | 1  | 2  | 2.00E-05 | Function unknown                                                           |
| Uncharacterized protein                         | F1RM98     | 0.838745 | 6  | 19 | 0.000753 | Protein binding; positive regulation of cellular process                   |
| 2'-5' oligoadenylate synthase                   | Q5MX78     | 0.836352 | 2  | 27 | 0.004357 | Ribonucleotide binding                                                     |
| Uncharacterized protein                         | A0A4X1WD16 | 0.834263 | 1  | 6  | 0.03558  | Function unknown                                                           |
| DNA_MISMATCH_REPAIR_2 domain-containing protein | I3L5Z8     | 0.824216 | 2  | 2  | 0.01612  | Function unknown                                                           |
| TLDc domain-containing protein                  | A0A4X1UQ31 | 0.818645 | 7  | 43 | 0.006877 | Function unknown                                                           |
| Galectin-3-binding protein                      | A0A5G2RLP2 | 0.814593 | 13 | 34 | 0.005314 | Function unknown                                                           |
| Uncharacterized protein                         | F1SS06     | 0.810289 | 1  | 1  | 0.03231  | Function unknown                                                           |
| Galectin                                        | A0A287A342 | 0.798613 | 11 | 45 | 0.01226  | Function unknown                                                           |
| Caspase 4, apoptosis-related cysteine peptidase | A0A0B8RT56 | 0.797204 | 9  | 28 | 0.000606 | Function unknown                                                           |
| FAM184 domain-containing                        | I3LV88     | 0.796314 | 1  | 1  | 0.03617  | Function unknown                                                           |

|                                |            |          |    |    |          |                                                                                        |
|--------------------------------|------------|----------|----|----|----------|----------------------------------------------------------------------------------------|
| protein                        |            |          |    |    |          |                                                                                        |
| CCHC-type domain-containing    | F1SMW0     | 0.793917 | 2  | 3  | 0.01277  | Function unknown                                                                       |
| protein                        |            |          |    |    |          |                                                                                        |
| Nuclear body protein SP140     | A0A480PYU5 | 0.779843 | 5  | 26 | 0.01075  | Function unknown                                                                       |
| isoform 5                      |            |          |    |    |          |                                                                                        |
| Apolipoprotein H               | A0A140TAK8 | 0.767339 | 3  | 13 | 0.008719 | Function unknown                                                                       |
| GB1/RHD3-type G domain-        | A0A4X1U8M2 | 0.765946 | 1  | 6  | 0.02652  | Function unknown                                                                       |
| containing protein             |            |          |    |    |          |                                                                                        |
| Poly [ADP-ribose] polymerase   | A0A4X1TD13 | 0.765145 | 45 | 31 | 0.00127  | Function unknown                                                                       |
| RNA helicase                   | A0A287AKR1 | 0.76304  | 20 | 21 | 0.001596 | Binding                                                                                |
| RECA_2 domain-containing       | A0A4X1TR78 | 0.761278 | 1  | 3  | 3.40E-05 | Anion binding; DNA metabolic process                                                   |
| protein                        |            |          |    |    |          |                                                                                        |
| Fibroblast growth factor       | A0A287BGK8 | 0.760152 | 1  | 3  | 0.02677  | Function unknown                                                                       |
| Nuclear autoantigen Sp-100     | R4L6V8     | 0.75475  | 2  | 28 | 0.03474  | Intracellular membrane-bounded organelle; nucleus                                      |
| isoform 4                      |            |          |    |    |          |                                                                                        |
| Uncharacterized protein        | A0A4X1URS1 | 0.749866 | 1  | 42 | 0.02308  | Function unknown                                                                       |
| Transporter 2, ATP-binding     | A5D9J7     | 0.747746 | 16 | 31 | 0.01017  | Ribonucleotide binding                                                                 |
| cassette, sub-family B         |            |          |    |    |          |                                                                                        |
| (MDR/TAP)                      |            |          |    |    |          |                                                                                        |
| GB1/RHD3-type G domain-        | A0A287BSF6 | 0.745783 | 2  | 30 | 0.02444  | Ribonucleotide binding                                                                 |
| containing protein             |            |          |    |    |          |                                                                                        |
| Interferon regulatory factor 7 | X2KPB3     | 0.743615 | 2  | 5  | 0.002987 | Transcription factor activity; sequence-specific DNA binding; adaptive immune response |
| Tumor necrosis factor receptor | Q8SQ34     | 0.739224 | 6  | 30 | 0.03582  | Signaling receptor activity; positive regulation of cellular biosynthetic process      |
| superfamily member 5           |            |          |    |    |          |                                                                                        |
| Pleckstrin homology-like       | F1SGD8     | 0.736577 | 1  | 2  | 0.00788  | Function unknown                                                                       |
| domain family A member 1       |            |          |    |    |          |                                                                                        |

|                                                                |            |          |    |    |          |                                                                                                                         |
|----------------------------------------------------------------|------------|----------|----|----|----------|-------------------------------------------------------------------------------------------------------------------------|
| CCDC66 domain-containing protein                               | I3L7C7     | 0.73314  | 1  | 1  | 0.02096  | Function unknown                                                                                                        |
| Uncharacterized protein                                        | A0A5G2QLT7 | 0.731775 | 2  | 4  | 0.02382  | Function unknown                                                                                                        |
| Aminopeptidase                                                 | K9J4P1     | 0.730795 | 7  | 7  | 0.03046  | Function unknown                                                                                                        |
| RNA helicase                                                   | F1S0P6     | 0.729356 | 12 | 22 | 0.004083 | Anion binding; negative regulation of cellular process                                                                  |
| Interferon regulatory factor                                   | A0A5S6GDS9 | 0.722825 | 5  | 24 | 0.000597 | Transcription factor activity; sequence-specific DNA binding, negative regulation of macromolecule biosynthetic process |
| Homeobox protein cut-like                                      | A0A4X1U3F5 | 0.713423 | 2  | 2  | 0.01952  | Function unknown                                                                                                        |
| Epithelial-stromal interaction protein 1 isoform 2             | A0A286ZSG6 | 0.711802 | 9  | 34 | 0.007058 | Function unknown                                                                                                        |
| UBC core domain-containing protein                             | A0A5G2Q9I0 | 0.710535 | 6  | 79 | 0.005605 | Ribonucleotide binding                                                                                                  |
| Reticulon                                                      | A0A4X1VKW2 | 0.709841 | 1  | 11 | 0.01387  | Function unknown                                                                                                        |
| 2'-5'-oligoadenylate synthase-like protein isoform a           | F1RIV0     | 0.697316 | 13 | 44 | 0.03516  | Ribonucleotide binding                                                                                                  |
| GTPase-activating Rap/Ran-GAP domain-like protein 3 isoform X1 | I3LIY1     | 0.691048 | 1  | 1  | 0.03553  | Function unknown                                                                                                        |
| Electron transfer flavoprotein-ubiquinone oxidoreductase       | F1RW89     | 0.686931 | 1  | 46 | 0.002947 | Oxidoreductase activity                                                                                                 |
| Interferon-induced GTP-binding protein Mx1                     | A0A481BA72 | 0.686812 | 1  | 77 | 0.01551  | Catalytic activity; cellular metabolic process                                                                          |
| Armadillo repeat-containing protein 4 isoform X3               | A0A480MFY5 | 0.68409  | 2  | 2  | 0.04023  | Function unknown                                                                                                        |
| Nucleotide-binding oligomerization domain 1                    | B0FSM7     | 0.679421 | 1  | 1  | 0.02509  | Ribonucleotide binding                                                                                                  |

|                                                      |            |          |    |    |          |                                                                                          |
|------------------------------------------------------|------------|----------|----|----|----------|------------------------------------------------------------------------------------------|
| 2'-5'-oligoadenylate synthase 1                      | Q29599     | 0.677282 | 3  | 45 | 0.006649 | 2'-5'-oliprimary metabolic process; cellular metabolic process                           |
| Fibroblast growth factor-inducible 14                | B7SLY2     | 0.676496 | 2  | 23 | 0.01422  | Positive regulation of developmental growth; regulation of developmental growth          |
| PH domain-containing protein                         | A0A4X1VUK6 | 0.673899 | 8  | 13 | 0.00743  | Function unknown                                                                         |
| Exonuclease domain-containing protein                | A0A4X1W796 | 0.666049 | 7  | 46 | 0.002538 | Function unknown                                                                         |
| LRRC37AB_C domain-containing protein                 | A0A286ZIV7 | 0.665644 | 2  | 2  | 0.008392 | Function unknown                                                                         |
| Phospholipid-transporting ATPase                     | A0A4X1ULA4 | 0.661048 | 3  | 3  | 0.03414  | Transmembrane transporter activity; leukocyte degranulation                              |
| Uncharacterized protein                              | I3LB77     | 0.66024  | 5  | 17 | 0.000693 | MRNA 3'-utr binding, organic substance transport                                         |
| IFITM2                                               | F4ZS15     | 0.657588 | 1  | 28 | 0.00304  | Integral component of membrane; cellular anatomical entity                               |
| Uncharacterized protein                              | A0A4X1VHT0 | 0.651654 | 21 | 33 | 0.001172 | Transferase activity, transferring pentosyl groups; regulation of mRNA metabolic process |
| Uncharacterized protein                              | I3L5Z9     | 0.648297 | 60 | 42 | 0.002487 | Function unknown                                                                         |
| Polypyrimidine tract-binding protein 1               | A0A286ZPA4 | 0.647217 | 1  | 61 | 0.003047 | Function unknown                                                                         |
| Uncharacterized protein                              | A0A4X1V406 | 0.643524 | 20 | 37 | 0.004326 | Ribonucleotide binding                                                                   |
| Dynamin GTPase                                       | A0A4X1VG57 | 0.629307 | 1  | 41 | 0.004953 | Function unknown                                                                         |
| Non-specific serine/threonine protein kinase         | F1RQR3     | 0.626525 | 3  | 3  | 0.000665 | Function unknown                                                                         |
| Coagulation factor III (Fragment)                    | A0A481D288 | 0.624166 | 3  | 15 | 0.001827 | Lipid binding, positive regulation of biological process; protein processing             |
| Putative E3 ubiquitin-protein ligase HERC6 isoform 1 | A0A480M1Q1 | 0.616749 | 1  | 33 | 0.02974  | Function unknown                                                                         |
| Uncharacterized protein                              | A0A287BKF1 | 0.614608 | 24 | 42 | 0.006977 | Ribonucleotide binding                                                                   |

|                                              |            |          |    |    |          |                                                                                             |
|----------------------------------------------|------------|----------|----|----|----------|---------------------------------------------------------------------------------------------|
| Uncharacterized protein                      | A0A5G2RNJ9 | 0.614085 | 1  | 2  | 0.004226 | Function unknown                                                                            |
| Ribonuclease H                               | A0A5G2R922 | 0.612383 | 1  | 7  | 0.01585  | Function unknown                                                                            |
| Uncharacterized protein                      | F1SL31     | 0.611186 | 1  | 34 | 0.015    | Function unknown                                                                            |
| Zinc finger protein 555 isoform 2            | A0A287A1D7 | 0.609357 | 1  | 6  | 0.04632  | Function unknown                                                                            |
| Plasminogen activator inhibitor 1            | P79335     | 0.606957 | 12 | 40 | 0.000552 | Serine-type endopeptidase inhibitor activity; negative regulation of endopeptidase activity |
| Myeloid cell nuclear differentiation antigen | A0A287AP08 | 0.603852 | 4  | 10 | 0.004269 | Function unknown                                                                            |
| Inhibitor_Mig-6 domain-containing protein    | A0A287A7S3 | 0.603145 | 2  | 4  | 0.003714 | Function unknown                                                                            |
| Collagen IV NC1 domain-containing protein    | A0A4X1U499 | 0.602292 | 1  | 1  | 0.002095 | Function unknown                                                                            |
| E3 ubiquitin-protein ligase RNF213 isoform 3 | A0A480YJW7 | 0.600502 | 27 | 34 | 0.005266 | Function unknown                                                                            |
| Uncharacterized protein                      | A0A4X1W154 | 0.596663 | 2  | 0  | 0.01719  | Function unknown                                                                            |
| RING-type domain-containing protein          | A0A4X1UID3 | 0.596581 | 2  | 30 | 0.02149  | Function unknown                                                                            |
| J domain-containing protein                  | A0A5G2R4I8 | 0.591194 | 1  | 42 | 0.03637  | Function unknown                                                                            |
| Arylamine N-acetyltransferase                | A0A480RQR3 | 0.589917 | 1  | 41 | 0.008489 | Function unknown                                                                            |
| Syndecan                                     | A0A5S6HZW1 | 0.587846 | 8  | 24 | 0.01365  | Locomotion, cell motility                                                                   |
| Poly ADP-ribose polymerase 12                | A0A480N6U6 | 0.580134 | 3  | 8  | 0.02232  | Transferase activity; transferring glycosyl groups                                          |
| Uncharacterized protein                      | A0A287B544 | 0.576938 | 2  | 38 | 0.006583 | Function unknown                                                                            |
| Alpha-actinin-4 isoform 1                    | A0A480ZDQ8 | 0.575463 | 1  | 72 | 0.002139 | Protein binding, protein transport; signal transduction                                     |
| Procollagen-proline 4-                       | A1X898     | 0.575381 | 1  | 59 | 0.04202  | Binding                                                                                     |

|                                                              |            |          |    |    |          |                                                            |
|--------------------------------------------------------------|------------|----------|----|----|----------|------------------------------------------------------------|
| dioxygenase                                                  |            |          |    |    |          |                                                            |
| Phospholipid-transporting                                    | M3TYF0     | 0.573945 | 1  | 1  | 0.0323   | Function unknown                                           |
| ATPase                                                       |            |          |    |    |          |                                                            |
| Uncharacterized protein                                      | A0A287ARP2 | 0.573711 | 1  | 17 | 0.001977 | Function unknown                                           |
| Uridine-cytidine kinase                                      | A0A4X1T9P1 | 0.571887 | 2  | 13 | 0.03183  | Small molecule binding; biosynthetic process               |
| HECT domain-containing protein                               | A0A4X1U9D8 | 0.570222 | 25 | 33 | 0.01593  | Function unknown                                           |
| Uncharacterized protein                                      | F1S5B5     | 0.562586 | 2  | 5  | 0.004215 | Function unknown                                           |
| BLOC-1-related complex subunit 7                             | A0A4X1TT04 | 0.561276 | 1  | 4  | 0.02158  | Function unknown                                           |
| F-BAR domain-containing protein                              | A0A5G2RMN3 | 0.560004 | 1  | 1  | 0.003662 | Function unknown                                           |
| Tripartite motif-containing protein 26                       | B6ICV1     | 0.559532 | 5  | 11 | 0.04198  | Binding                                                    |
| Thiopurine S-methyltransferase                               | F1RUH7     | 0.559354 | 1  | 68 | 0.001714 | Methyltransferase activity; methylation                    |
| Voltage-dependent anion-selective channel protein 2          | A0A4X1UZQ9 | 0.559175 | 1  | 15 | 0.01559  | Function unknown                                           |
| Uncharacterized protein                                      | A0A4X1UW90 | 0.558469 | 27 | 18 | 0.02264  | Function unknown                                           |
| Cationic amino acid transporter 2                            | A0A4X1TZW6 | 0.55     | 2  | 5  | 0.003146 | Function unknown                                           |
| Proline dehydrogenase                                        | M3V806     | 0.548795 | 8  | 18 | 0.004382 | Function unknown                                           |
| Transmembrane gamma-carboxyglutamic acid protein 1 isoform 1 | I3LMT5     | 0.548264 | 4  | 19 | 0.009384 | Calcium ion binding                                        |
| Uncharacterized protein                                      | A0A286ZTV2 | 0.547488 | 1  | 5  | 0.003487 | Integral component of membrane; cellular anatomical entity |

|                                                        |            |          |    |    |          |                                                                                                             |
|--------------------------------------------------------|------------|----------|----|----|----------|-------------------------------------------------------------------------------------------------------------|
| UPAR/Ly6 domain-containing protein                     | A0A287B805 | 0.541485 | 3  | 45 | 0.02681  | Function unknown                                                                                            |
| Zinc fingers and homeoboxes protein 1                  | F1RR15     | 0.540952 | 3  | 6  | 0.01713  | Protein heterodimerization activity, negative regulation of macromolecule biosynthetic process              |
| ATP-sulfurylase                                        | A0A481BE86 | 0.537697 | 1  | 4  | 0.03342  | Function unknown                                                                                            |
| Ubiquitin carboxyl-terminal hydrolase                  | F1RTR5     | 0.533451 | 1  | 1  | 0.01852  | Chromatin binding; covalent chromatin modification                                                          |
| Urokinase plasminogen activator                        | A0A0B8RSD8 | 0.528392 | 4  | 16 | 0.000802 | Function unknown                                                                                            |
| Multi-drug resistance protein 1 transcript variant 2   | A0A0E3MY68 | 0.52502  | 1  | 36 | 0.004046 | Ribonucleotide binding                                                                                      |
| Polymeric immunoglobulin receptor                      | A0A4X1UQL1 | 0.514037 | 3  | 6  | 0.005094 | Integral component of membrane; cellular anatomical entity                                                  |
| Ig-like domain-containing protein                      | A0A287A1Y1 | 0.510542 | 6  | 23 | 0.0171   | Antigen processing and presentation of peptide antigen via mhc class I; antigen processing and presentation |
| Z-DNA-binding protein 1                                | A0A481BW17 | 0.507553 | 2  | 39 | 2.10E-05 | Function unknown                                                                                            |
| Class E basic helix-loop-helix protein 41              | A0A287AYR6 | 0.505189 | 2  | 4  | 0.000608 | Function unknown                                                                                            |
| Endo/exonuclease/phosphatase domain-containing protein | A0A4X1V6E3 | 0.504998 | 1  | 2  | 0.006941 | Function unknown                                                                                            |
| Protein MCM10 homolog                                  | A0A287AY37 | 0.502307 | 3  | 3  | 0.02363  | Function unknown                                                                                            |
| Plasminogen                                            | P06867     | 0.499599 | 10 | 15 | 0.01564  | Regulation of blood coagulation; negative regulation of blood coagulation                                   |
| RING-type E3 ubiquitin transferase                     | I3LRN0     | 0.498269 | 31 | 46 | 0.006589 | Function unknown                                                                                            |
| PARP-1 binding protein                                 | A0A5G2QYX1 | 0.494283 | 1  | 1  | 0.01248  | Function unknown                                                                                            |
| Elongation factor 1-gamma                              | A0A4X1VKK0 | 0.493786 | 1  | 60 | 0.000305 | Function unknown                                                                                            |

|                                                  |            |          |    |    |          |                                                                                                      |
|--------------------------------------------------|------------|----------|----|----|----------|------------------------------------------------------------------------------------------------------|
| VLIG-type G domain-containing protein            | F1RMQ6     | 0.493208 | 9  | 4  | 0.006861 | Function unknown                                                                                     |
| Transcription factor jun-B                       | I3LJU2     | 0.490426 | 5  | 27 | 0.03037  | Transcription factor activity, sequence-specific DNA binding; anatomical structure development       |
| Tether containing UBX domain for GLUT4 isoform 2 | A0A480NU10 | 0.485817 | 3  | 34 | 0.02326  | Function unknown                                                                                     |
| Receptor protein-tyrosine kinase                 | F1SUT8     | 0.482384 | 23 | 37 | 0.0006   | Transmembrane receptor protein kinase activity; negative regulation of signaling                     |
| Phosphoglycerate mutase                          | B5KJG2     | 0.481403 | 1  | 12 | 0.04568  | Isomerase activity, organic acid metabolic process                                                   |
| Rhomboid-related protein 4 isoform X1            | A0A480YX23 | 0.479941 | 1  | 6  | 0.01091  | Function unknown                                                                                     |
| Reticulon (Fragment)                             | A0A1Y1FJ11 | 0.479415 | 1  | 42 | 0.006662 | Cadherin binding; positive regulation of locomotion                                                  |
| ML domain-containing protein                     | A0A4X1TT31 | 0.476714 | 6  | 34 | 0.000972 | Function unknown                                                                                     |
| Uncharacterized protein                          | A0A287ABC3 | 0.476675 | 2  | 5  | 0.005583 | Function unknown                                                                                     |
| Uncharacterized protein                          | A0A4X1T995 | 0.475462 | 1  | 0  | 0.04474  | Cadherin binding, regulation of cytosolic calcium ion concentration                                  |
| XIAP-associated factor 1                         | K9IVW8     | 0.473008 | 6  | 29 | 0.01441  | Function unknown                                                                                     |
| ASD2 domain-containing protein                   | A0A4X1TVX4 | 0.472839 | 1  | 13 | 0.02071  | Function unknown                                                                                     |
| NPC intracellular cholesterol transporter 1      | A0A5G2RDJ5 | 0.471449 | 1  | 11 | 0.04671  | Small molecule binding, integral component of plasma membrane; establishment of localization in cell |
| Peptidase A1 domain-containing protein           | A0A4X1T5P4 | 0.465517 | 1  | 3  | 0.0391   | Function unknown                                                                                     |
| Uncharacterized protein                          | A0A4X1SW44 | 0.459789 | 3  | 2  | 0.000608 | Protein heterodimerization activity; signal transduction                                             |
| MHC class I antigen (Fragment)                   | K9LRJ6     | 0.459112 | 3  | 42 | 0.01817  | Antigen processing and presentation; integral component of membrane                                  |
| Aprotinin (Fragment)                             | B0LXF7     | 0.454334 | 1  | 26 | 0.01914  | Enzyme regulator activity                                                                            |

|                                                              |            |          |    |    |          |                                                                                                  |
|--------------------------------------------------------------|------------|----------|----|----|----------|--------------------------------------------------------------------------------------------------|
| Tetratricopeptide repeat protein 14 isoform a                | A0A287AVL3 | 0.452973 | 1  | 1  | 0.008206 | Binding                                                                                          |
| Uncharacterized protein                                      | A0A4X1U686 | 0.451804 | 1  | 1  | 0.006141 | Function unknown                                                                                 |
| Beta-2-microglobulin                                         | A0A4X1VG41 | 0.451493 | 3  | 32 | 0.03628  | Protein binding; positive regulation of cellular senescence                                      |
| Uncharacterized protein                                      | A0A4X1SXM2 | 0.449796 | 1  | 8  | 0.03855  | Receptor binding; signal transduction                                                            |
| TPR_REGION domain-containing protein                         | A0A4X1U2X7 | 0.446353 | 3  | 9  | 0.0193   | Function unknown                                                                                 |
| Uncharacterized protein                                      | A0A287BD75 | 0.442298 | 1  | 1  | 0.001998 | Function unknown                                                                                 |
| Meiosis-specific nuclear structural protein 1                | F1RZG8     | 0.442128 | 3  | 4  | 0.002777 | Protein binding; positive regulation of biological process                                       |
| Uncharacterized protein                                      | A0A287A1X3 | 0.440465 | 11 | 21 | 0.004206 | Metal ion binding; membrane-bounded organelle                                                    |
| KIND domain-containing protein                               | A0A4X1VVD6 | 0.440438 | 4  | 5  | 0.001202 | Function unknown                                                                                 |
| DALR anticodon-binding domain-containing protein 3 isoform 1 | F1SKI7     | 0.438751 | 1  | 2  | 0.01795  | Function unknown                                                                                 |
| Uncharacterized protein                                      | A0A5G2Q6W7 | 0.436452 | 6  | 11 | 0.0218   | Cell-cell adhesion; integral component of membrane                                               |
| CST complex subunit CTC1                                     | A0A4X1V8I6 | 0.433298 | 3  | 4  | 0.0332   | Function unknown                                                                                 |
| Protein fem-1 homolog B                                      | I3L6T4     | 0.429318 | 5  | 10 | 0.006546 | Receptor binding, morphogenesis of a branching structure; morphogenesis of an epithelium         |
| Aquaporin-5                                                  | A0A4X1WCJ0 | 0.425045 | 1  | 2  | 0.003184 | Transmembrane transporter activity                                                               |
| ADP-ribosyl cyclase/cyclic ADP-ribose hydrolase              | A0A481D5X2 | 0.424914 | 1  | 32 | 0.002487 | Signaling adaptor activity; phosphate-containing compound metabolic process                      |
| Signal transducer and activator of transcription             | A0A4X1THM1 | 0.422745 | 1  | 60 | 0.04674  | Transcription factor activity; sequence-specific DNA binding; regulation of cell differentiation |
| Uncharacterized protein                                      | F1S6F1     | 0.42059  | 2  | 6  | 0.003557 | Function unknown                                                                                 |

|                                                       |            |          |    |    |          |                                                                                               |
|-------------------------------------------------------|------------|----------|----|----|----------|-----------------------------------------------------------------------------------------------|
| Ribosomal RNA processing protein 36 homolog isoform 1 | A0A480TNH7 | 0.417719 | 5  | 24 | 0.0084   | Nucleic acid metabolic process; nucleic acid phosphodiester bond hydrolysis                   |
| Copine-2                                              | A0A287AKE4 | 0.417499 | 2  | 6  | 0.032    | Function unknown                                                                              |
| Uncharacterized protein                               | A0A5G2R0A9 | 0.416925 | 23 | 55 | 0.00731  | Function unknown                                                                              |
| Glyco_transf_24 domain-containing protein             | A0A5G2Q988 | 0.416884 | 1  | 49 | 0.02689  | Transferase activity, transferring hexosyl groups                                             |
| 60S ribosomal protein L7 (Fragment)                   | Q6QAS9     | 0.415317 | 1  | 73 | 0.03863  | MRNA binding, nuclear-transcribed mRNA catabolic process, nonsense-mediated decay             |
| Uncharacterized protein                               | A0A4X1SHM4 | 0.414296 | 26 | 47 | 0.001758 | Function unknown                                                                              |
| Sterol regulatory element-binding protein 1           | O97676     | 0.41369  | 2  | 2  | 0.0342   | Transcription factor activity, sequence-specific DNA binding; regulation of peptide secretion |
| Uncharacterized protein                               | A0A4X1USN7 | 0.413043 | 2  | 3  | 0.03445  | Zinc ion binding                                                                              |
| Transcription elongation factor SPT5                  | A0A5G2RNJ4 | 0.407706 | 3  | 38 | 0.0027   | Translation elongation factor activity                                                        |
| Tyrosine-protein kinase                               | A0A4X1V771 | 0.406538 | 1  | 6  | 0.02034  | Cellular protein modification process; negative regulation of RNA biosynthetic process        |
| Beta-1,4-galactosyltransferase 5                      | A0A5S8MJ01 | 0.405399 | 4  | 13 | 0.004927 | Udp-glycosyltransferase activity; lipid biosynthetic process                                  |
| Translocase of outer mitochondrial membrane 6         | A0A287BEP4 | 0.404451 | 2  | 58 | 0.01959  | Function unknown                                                                              |
| High density lipoprotein binding protein              | A0A0B8S073 | 0.403893 | 1  | 51 | 0.02977  | RNA binding                                                                                   |
| Metalloproteinase inhibitor 3                         | A0A286ZZX3 | 0.401149 | 3  | 12 | 0.0162   | Peptidase inhibitor activity; regulation of nitrogen compound metabolic process               |
| Galectin                                              | A0A286ZYZ8 | 0.396303 | 1  | 38 | 0.03571  | Binding                                                                                       |
| Metallophos domain-containing protein                 | I3LCM5     | 0.389688 | 2  | 7  | 0.02865  | Function unknown                                                                              |
| BMP and activin membrane-                             | A0A480KI92 | 0.38939  | 1  | 3  | 0.003133 | Receptor binding; positive regulation of cell proliferation                                   |

|                                            |            |          |    |    |          |                                                                                        |
|--------------------------------------------|------------|----------|----|----|----------|----------------------------------------------------------------------------------------|
| bound inhibitor homolog                    |            |          |    |    |          |                                                                                        |
| Uncharacterized protein                    | A0A4X1V704 | 0.385394 | 1  | 1  | 0.03052  | Function unknown                                                                       |
| Pirh2                                      | A1YJE5     | 0.383993 | 3  | 10 | 0.01642  | Zinc ion binding                                                                       |
| Perilipin                                  | R9WHX5     | 0.383354 | 15 | 34 | 0.003386 | Lipid particle, lipid transport                                                        |
| Peptidase A1 domain-<br>containing protein | A0A4X1VM25 | 0.382744 | 1  | 2  | 0.000234 | Function unknown                                                                       |
| Uncharacterized protein                    | A0A4X1U2C6 | 0.380626 | 1  | 3  | 0.00996  | Function unknown                                                                       |
| Ras-related protein Rap-2a                 | Q06AU2     | 0.378881 | 6  | 63 | 0.01732  | Nucleoside-triphosphatase activity; regulation of phosphorus metabolic process         |
| Protein-tyrosine<br>sulfotransferase       | A0A480JPS8 | 0.377604 | 2  | 5  | 0.03251  | Binding                                                                                |
| Tudor domain-containing<br>protein 7       | A0A4X1UP96 | 0.372806 | 5  | 5  | 0.02241  | Function unknown                                                                       |
| Phospholipid-transporting<br>ATPase        | A0A4X1TLB7 | 0.372657 | 2  | 2  | 0.03372  | Function unknown                                                                       |
| BZIP domain-containing<br>protein          | A0A4X1VLW8 | 0.371197 | 2  | 23 | 0.02678  | Double-stranded DNA binding                                                            |
| SHS2_Rpb7-N domain-<br>containing protein  | F1SC14     | 0.370794 | 5  | 18 | 0.03566  | DNA-directed RNA polymerase activity                                                   |
| HMG domain-containing<br>protein 4         | A0A287B9A3 | 0.367993 | 1  | 3  | 0.02111  | Function unknown                                                                       |
| Laminin subunit gamma-2<br>isoform a       | F1S662     | 0.367503 | 36 | 38 | 0.03513  | Function unknown                                                                       |
| Laminin subunit alpha-1<br>(Fragment)      | A0A480XDX5 | 0.367029 | 1  | 17 | 0.01149  | Function unknown                                                                       |
| Amino acid transporter                     | F1S763     | 0.365007 | 1  | 3  | 0.01887  | Function unknown                                                                       |
| Signal transducer and                      | A0A4X1W8D9 | 0.364463 | 11 | 16 | 0.03709  | Transcription factor activity, sequence-specific DNA binding; immune effector process, |

|                                                                |            |          |    |    |          |                                                                                                                            |
|----------------------------------------------------------------|------------|----------|----|----|----------|----------------------------------------------------------------------------------------------------------------------------|
| activator of transcription                                     |            |          |    |    |          | regulation of protein phosphorylation                                                                                      |
| Ras-associating domain-containing protein                      | A0A4X1V4G5 | 0.363701 | 1  | 2  | 0.004983 | Function unknown                                                                                                           |
| Calponin-homology (CH) domain-containing protein               | A0A5G2QI59 | 0.362694 | 7  | 9  | 0.02106  | Function unknown                                                                                                           |
| Phospholipid scramblase                                        | I3LHI3     | 0.362388 | 4  | 20 | 0.04363  | Protein binding, organophosphate ester transport; sterol homeostasis                                                       |
| Daxx                                                           | A0A480ZCA1 | 0.361958 | 3  | 6  | 0.02276  | Function unknown                                                                                                           |
| Prolyl 3-hydroxylase 1 isoform 1                               | A0A480KI56 | 0.361897 | 1  | 29 | 0.02903  | Function unknown                                                                                                           |
| ADAR adenosine deaminase RNA specific                          | K9J4M6     | 0.361793 | 43 | 46 | 0.00385  | RNA binding, RNA processing                                                                                                |
| Zinc finger MYM-type protein 1 isoform X1                      | A0A481C188 | 0.361151 | 2  | 2  | 0.005405 | Function unknown                                                                                                           |
| Uncharacterized protein                                        | A0A287APC5 | 0.35985  | 3  | 8  | 0.005894 | Transcription regulator activity                                                                                           |
| Osteopontin                                                    | P14287     | 0.357729 | 10 | 40 | 0.0296   | Integrin binding; regulation of tissue remodeling, positive regulation of nucleobase-containing compound metabolic process |
| Heparin cofactor 2                                             | A0A480RKY5 | 0.35474  | 1  | 3  | 0.009598 | Extracellular space, cellular anatomical entity                                                                            |
| Complex I-KFYI                                                 | A1XQS6     | 0.354278 | 2  | 24 | 0.009943 | Respiratory chain complex I; macromolecular complex                                                                        |
| Phospholipid scramblase                                        | A0A5G2QX76 | 0.353967 | 5  | 18 | 0.001525 | Function unknown                                                                                                           |
| Eukaryotic translation initiation factor 3 subunit K isoform 1 | A0A481D1L8 | 0.353952 | 1  | 50 | 0.03555  | Translation initiation factor activity                                                                                     |
| AKAP2_C domain-containing protein                              | A0A287AMX5 | 0.352666 | 15 | 21 | 0.01165  | Function unknown                                                                                                           |
| GMP_PDE_delta domain-containing protein                        | A0A5G2QW04 | 0.349534 | 1  | 20 | 0.0328   | Function unknown                                                                                                           |
| Uncharacterized protein                                        | F1SBB3     | 0.34926  | 33 | 12 | 0.02509  | Function unknown                                                                                                           |

|                                                                    |            |          |    |    |          |                                                                                   |
|--------------------------------------------------------------------|------------|----------|----|----|----------|-----------------------------------------------------------------------------------|
| Semaphorin-4B isoform 1                                            | A0A287A766 | 0.349112 | 7  | 9  | 0.005664 | Function unknown                                                                  |
| RING-type E3 ubiquitin transferase                                 | A0A4X1V887 | 0.347805 | 11 | 27 | 0.01074  | Function unknown                                                                  |
| Cytochrome P450                                                    | A7KZR2     | 0.347549 | 2  | 46 | 0.02386  | Oxidoreductase activity                                                           |
| Dual specificity protein phosphatase                               | A0A5G2RAD0 | 0.347259 | 1  | 5  | 0.003963 | Function unknown                                                                  |
| Uncharacterized protein                                            | A0A4X1UQJ8 | 0.346955 | 2  | 10 | 0.01103  | Cellular component assembly; SMN complex                                          |
| Uncharacterized protein                                            | A0A5G2QI85 | 0.3458   | 10 | 68 | 0.009622 | Ribonucleotide binding, positive regulation of cellular process                   |
| Lysosome membrane protein 2                                        | F1RYT3     | 0.343871 | 10 | 25 | 0.004294 | Quaternary ammonium group binding; lysosome                                       |
| Pleckstrin homology domain-containing family A member 1 isoform X7 | A0A480QEJ7 | 0.343142 | 4  | 18 | 0.001573 | Function unknown                                                                  |
| Guanylate binding protein 2                                        | B2XWS2     | 0.342567 | 5  | 20 | 0.02755  | Ribonucleotide binding                                                            |
| G_PROTEIN_RECEP_F3_4 domain-containing protein                     | A0A4X1V7D7 | 0.342287 | 4  | 14 | 0.00606  | Function unknown                                                                  |
| Dipeptidyl peptidase 4                                             | A0A5G2Q7G7 | 0.341889 | 17 | 20 | 0.006007 | Catalytic activity, acting on a protein; positive regulation of t cell activation |
| Solute carrier family 30 member 2                                  | B5A8K5     | 0.34146  | 1  | 3  | 0.01182  | Intrinsic component of membrane; cellular anatomical entity                       |
| Tuberin isoform 7                                                  | A0A480W2V1 | 0.341397 | 2  | 6  | 0.03302  | Enzyme activator activity                                                         |
| Tripartite motif-containing protein 16 isoform a                   | A0A481BZY0 | 0.340576 | 8  | 21 | 0.002472 | Function unknown                                                                  |
| ATPase H(+)-transporting lysosomal accessory protein 2             | A0A5G2QNQ8 | 0.335385 | 1  | 26 | 0.02403  | Function unknown                                                                  |
| CCN family member 2                                                | F1S3P6     | 0.334895 | 6  | 20 | 0.03285  | Receptor binding; negative regulation of cellular process; signal transduction    |
| Uncharacterized protein                                            | A0A4X1UUL9 | 0.334598 | 1  | 30 | 0.03999  | Function unknown                                                                  |

|                                                                                        |            |          |    |    |          |                                                                |
|----------------------------------------------------------------------------------------|------------|----------|----|----|----------|----------------------------------------------------------------|
| Uncharacterized protein                                                                | A0A286ZRH1 | 0.334329 | 23 | 27 | 0.004041 | Function unknown                                               |
| Uncharacterized protein                                                                | A0A5G2RA88 | 0.333895 | 3  | 22 | 0.04709  | Protein localization; endoplasmic reticulum; peptide transport |
| Adenosine deaminase 2                                                                  | P58780     | 0.333895 | 2  | 7  | 0.01436  | Adenosine deaminase activity; biosynthetic process             |
| Uncharacterized protein                                                                | A0A287A7A8 | 0.333093 | 4  | 4  | 0.03562  | Function unknown                                               |
| CBFD_NFYB_HMF domain-<br>containing protein                                            | A0A287AUX2 | 0.33285  | 3  | 33 | 0.01331  | Heterocyclic compound binding                                  |
| Dolichyl-<br>diphosphooligosaccharide--<br>protein glycosyltransferase<br>subunit KCP2 | A0A4X1VZL2 | 0.33243  | 1  | 8  | 0.01074  | Function unknown                                               |
| Caspase-10 isoform 1<br>preproprotein                                                  | A0A286ZWN2 | 0.33241  | 10 | 26 | 0.006527 | Peptidase activity, regulation of cell death                   |
| G patch domain-containing<br>protein 4 isoform 2                                       | A0A481ASU0 | 0.332006 | 4  | 9  | 0.008409 | Heterocyclic compound binding                                  |
| Epiplakin isoform X1-like<br>(Fragment)                                                | A0A480PQZ4 | 0.331814 | 14 | 30 | 0.009525 | Function unknown                                               |
| Junctional adhesion molecule<br>1                                                      | A0A5K1V5T2 | 0.327128 | 10 | 37 | 0.002172 | Function unknown                                               |
| Uncharacterized protein                                                                | A0A4X1TWZ9 | 0.321851 | 6  | 2  | 0.04228  | Function unknown                                               |
| G-protein-coupled receptor 39                                                          | F1RY26     | 0.319627 | 5  | 10 | 0.01747  | Metal ion binding; intrinsic component of membrane             |
| 2-5A-dependent ribonuclease                                                            | A0A286ZPJ7 | 0.317989 | 19 | 37 | 0.007735 | Phosphotransferase activity; alcohol group as acceptor         |
| Nidogen-2 isoform X1                                                                   | A0A480MU29 | 0.316041 | 1  | 41 | 0.02777  | Function unknown                                               |
| Uncharacterized protein                                                                | I3LJ31     | 0.313351 | 3  | 5  | 0.005211 | Integral component of membrane; cellular anatomical entity     |
| Uncharacterized protein                                                                | A0A4X1TIC9 | 0.313076 | 1  | 21 | 0.00492  | Function unknown                                               |
| Uncharacterized protein                                                                | A0A4X1U855 | 0.312799 | 7  | 17 | 0.01091  | Function unknown                                               |
| RING-type domain-containing                                                            | A0A287B7H5 | 0.311564 | 1  | 2  | 0.01986  | Function unknown                                               |

|                                                    |            |          |    |    |          |                                                                                              |
|----------------------------------------------------|------------|----------|----|----|----------|----------------------------------------------------------------------------------------------|
| protein                                            |            |          |    |    |          |                                                                                              |
| V-type proton ATPase subunit a                     | A0A4X1STL1 | 0.310445 | 13 | 21 | 0.003733 | Function unknown                                                                             |
| CW-type domain-containing protein                  | A0A5G2QF40 | 0.310284 | 8  | 10 | 0.02577  | Function unknown                                                                             |
| Oxysterol-binding protein                          | A0A5G2QUB9 | 0.309421 | 1  | 3  | 0.04428  | Function unknown                                                                             |
| AAA domain-containing protein                      | F2Z5H2     | 0.307856 | 13 | 48 | 0.000479 | Binding; positive regulation of endocytosis                                                  |
| Anaphase-promoting complex subunit 10              | D5L7X1     | 0.307211 | 3  | 22 | 0.04413  | Transferase complex; regulation of cell cycle process                                        |
| Integrator complex subunit 14                      | A0A5K1U644 | 0.306957 | 5  | 16 | 0.03426  | Function unknown                                                                             |
| Uncharacterized protein                            | F1SED4     | 0.305812 | 14 | 50 | 0.002509 | Binding                                                                                      |
| Proteasome subunit beta                            | Q2PYM7     | 0.305577 | 6  | 37 | 0.04716  | Peptidase activity, acting on l-amino acid peptides; regulation of proteolysis               |
| RUN and TBC1 domain-containing protein 3           | A0A480PGU9 | 0.305377 | 3  | 5  | 0.02247  | Function unknown                                                                             |
| Transforming growth factor beta-1 proprotein       | P07200     | 0.304799 | 9  | 27 | 0.001228 | Receptor binding; immune system process                                                      |
| N-acetyltransferase domain-containing protein      | A0A4X1W7X4 | 0.303804 | 5  | 23 | 8.00E-05 | Transferase activity, transferring acyl groups other than amino-acyl groups                  |
| BTB domain-containing protein                      | A0A287B5G3 | 0.300476 | 7  | 14 | 0.03854  | Negative regulation of apoptotic signaling pathway; negative regulation of metabolic process |
| Phosphoenolpyruvate carboxykinase, cytosolic [GTP] | A0A4X1UM84 | 0.299862 | 12 | 32 | 0.007555 | Positive regulation of nitrogen compound metabolic process; response to chemical             |
| Ribosomal_L7Ae domain-containing protein           | I3LCJ7     | 0.299802 | 5  | 31 | 0.00829  | Organic cyclic compound binding; endonuclease complex                                        |
| SAM_MT_RSMB_NOP                                    | A0A4X1UJD8 | 0.298059 | 6  | 22 | 0.00133  | Binding                                                                                      |

|                                  |            |          |    |    |          |                                                                                |
|----------------------------------|------------|----------|----|----|----------|--------------------------------------------------------------------------------|
| domain-containing protein        |            |          |    |    |          |                                                                                |
| Cytochrome c oxidase subunit     | A0A287BGN0 | 0.297583 | 2  | 43 | 0.03747  | Hydrogen ion transmembrane transporter activity; mitochondrial protein complex |
| Acyl-coenzyme A oxidase          | A0A5G2R961 | 0.29504  | 2  | 5  | 0.04846  | Function unknown                                                               |
| TBC1 domain family member        | I3LNR0     | 0.293977 | 6  | 6  | 0.00042  | Function unknown                                                               |
| 1 isoform X4                     |            |          |    |    |          |                                                                                |
| Plectin (Fragment)               | K9IVQ6     | 0.291673 | 1  | 71 | 0.008935 | Function unknown                                                               |
| Nucleolar transcription factor 1 | F1RQY4     | 0.288216 | 1  | 40 | 0.03351  | DNA binding; membrane-bounded organelle                                        |
| isoform X1                       |            |          |    |    |          |                                                                                |
| Uncharacterized protein          | A0A4X1UCR9 | 0.286767 | 24 | 43 | 0.004056 | Cytokine receptor activity                                                     |
| Formin-like protein 2 isoform    | A0A480RHY5 | 0.286477 | 14 | 19 | 0.02293  | Function unknown                                                               |
| X5                               |            |          |    |    |          |                                                                                |
| Lipoprotein lipase               | I3LUA0     | 0.286373 | 6  | 20 | 0.01412  | Triglyceride lipase activity; endosome; early endosome                         |
| IF rod domain-containing         | A0A4X1WBS5 | 0.286095 | 2  | 10 | 0.000663 | Function unknown                                                               |
| protein                          |            |          |    |    |          |                                                                                |
| Phosphate transporter            | M3V824     | 0.285935 | 5  | 9  | 0.02096  | Function unknown                                                               |
| DNA helicase                     | A0A5K1VUK9 | 0.285876 | 23 | 19 | 0.003624 | Function unknown                                                               |
| Integrin-associated protein      | A0A4X1SPG5 | 0.285161 | 2  | 14 | 0.03335  | Thrombospondin receptor activity; extracellular vesicle                        |
| TNF receptor-associated          | A0A480SEQ9 | 0.284987 | 3  | 7  | 0.007375 | Function unknown                                                               |
| factor                           |            |          |    |    |          |                                                                                |
| [Histone H3]-lysine(4) N-        | A0A287A913 | 0.284839 | 1  | 0  | 0.03028  | Function unknown                                                               |
| trimethyltransferase             |            |          |    |    |          |                                                                                |
| Hexosyltransferase               | A0A287AWP7 | 0.284049 | 3  | 7  | 0.02412  | Function unknown                                                               |
| Ubiquitinyl hydrolase 1          | F1RXF7     | 0.283781 | 8  | 38 | 0.04263  | Thiol-dependent ubiquitin-specific protease activity                           |
| Longin domain-containing         | A0A287B7S4 | 0.282275 | 2  | 11 | 0.02907  | Function unknown                                                               |
| protein                          |            |          |    |    |          |                                                                                |
| ADP/ATP translocase 3            | A0A287AXS7 | 0.282015 | 7  | 65 | 0.01064  | Adp transmembrane transporter activity                                         |

|                                                          |            |          |    |    |          |                                                                                         |
|----------------------------------------------------------|------------|----------|----|----|----------|-----------------------------------------------------------------------------------------|
| AB hydrolase-1 domain-containing protein                 | A0A4X1VWB4 | 0.279886 | 2  | 9  | 0.0345   | Intrinsic component of membrane; cellular anatomical entity                             |
| Exocyst complex component                                | A0A480UT78 | 0.279845 | 4  | 8  | 0.002696 | Exocytic process; macromolecular complex                                                |
| t-SNARE coiled-coil homology domain-containing protein   | A0A4X1VQQ8 | 0.279353 | 2  | 20 | 0.003373 | Snare binding, endomembrane system                                                      |
| Inter-alpha-trypsin inhibitor heavy chain H2             | A0A5G2QEV5 | 0.278699 | 9  | 10 | 0.0156   | Serine-type endopeptidase inhibitor activity; oxoacid metabolic process                 |
| 3-hydroxy-3-methylglutaryl coenzyme A reductase          | A0A4X1SQE9 | 0.27824  | 8  | 11 | 0.02539  | Function unknown                                                                        |
| Sorting nexin-24 isoform X4                              | A0A480Q2P1 | 0.277886 | 1  | 12 | 0.01988  | Binding                                                                                 |
| Uncharacterized protein                                  | A0A4X1UTU8 | 0.275916 | 2  | 7  | 0.01086  | Function unknown                                                                        |
| Hermansky-Pudlak syndrome 3 protein homolog              | A5A772     | 0.27398  | 5  | 6  | 0.009781 | Organelle organization; pigmentation                                                    |
| ATP-binding cassette, sub-family C (CFTR/MRP), member 13 | K9J4N7     | 0.273938 | 20 | 22 | 0.008823 | Function unknown                                                                        |
| Secretory carrier-associated membrane protein            | A0A4X1VTN9 | 0.273283 | 3  | 14 | 0.003668 | Function unknown                                                                        |
| Tumor protein p73                                        | A0A4X1WA24 | 0.271375 | 4  | 7  | 0.003205 | Function unknown                                                                        |
| Lethal(2) giant larvae protein homolog 2                 | A0A481CW44 | 0.270849 | 29 | 37 | 0.007905 | Function unknown                                                                        |
| Uncharacterized protein                                  | F1S1J8     | 0.270179 | 6  | 35 | 0.03383  | Function unknown                                                                        |
| USP domain-containing protein                            | A0A4X1UCD6 | 0.270157 | 1  | 5  | 0.03346  | Peptidase activity, acting on l-amino acid peptides; cellular protein metabolic process |
| Uncharacterized protein                                  | A0A286ZMQ7 | 0.269031 | 8  | 26 | 0.002548 | Function unknown                                                                        |
| Uncharacterized protein                                  | A0A4X1TDN4 | 0.265297 | 18 | 26 | 0.01732  | Protein binding                                                                         |

|                                                                                 |            |           |    |    |          |                                                                                                       |
|---------------------------------------------------------------------------------|------------|-----------|----|----|----------|-------------------------------------------------------------------------------------------------------|
| Polynucleotide phosphorylase 1                                                  | A0A287AMV5 | 0.264709  | 44 | 67 | 0.02717  | Organic cyclic compound binding; aromatic compound catabolic process; RNA processing                  |
| Uncharacterized protein                                                         | A0A4X1TMR0 | 0.264278  | 4  | 45 | 0.01409  | Acyl-coa hydrolase activity; purine nucleoside bisphosphate metabolic process                         |
| Tr-type G domain-containing protein                                             | A0A4X1WBZ8 | 0.263849  | 21 | 32 | 0.04751  | Translation initiation factor activity                                                                |
| Uncharacterized protein                                                         | A0A4X1UBH5 | 0.263142  | 1  | 13 | 0.04905  | Function unknown                                                                                      |
| <b>Downregulated proteins in PK-15-infected cells (a total of 131 proteins)</b> |            |           |    |    |          |                                                                                                       |
| Glyceraldehyde-3-phosphate dehydrogenase                                        | A0A076KRX0 | -1.03138  | 3  | 77 | 0.02485  | Regulation of translation; oxidoreductase activity, acting on the aldehyde or oxo group of donors     |
| Cellular retinol binding protein 1                                              | Q53J08     | -0.672103 | 2  | 57 | 0.03177  | Terpenoid biosynthetic process; binding                                                               |
| SUI1 domain-containing protein                                                  | A0A5G2QLD8 | -0.635261 | 3  | 78 | 0.002729 | Regulation of translation; translation initiation factor activity                                     |
| Olfactory receptor                                                              | A0A287AX70 | -0.608824 | 1  | 2  | 0.03294  | Signal transduction; olfactory receptor activity                                                      |
| Uncharacterized protein                                                         | A0A5G2QVV0 | -0.605594 | 1  | 68 | 0.03066  | Function unknown                                                                                      |
| SGF29 C-terminal domain-containing protein                                      | A0A4X1U8F2 | -0.576793 | 4  | 25 | 0.000249 | Covalent chromatin modification; protein binding                                                      |
| Thiopurine S-methyltransferase                                                  | A0A481DB59 | -0.569263 | 2  | 74 | 0.007656 | Methylation; methyltransferase activity                                                               |
| Syndecan                                                                        | A0A287B0S3 | -0.540026 | 3  | 9  | 0.000242 | Function unknown                                                                                      |
| Heterogeneous nuclear ribonucleoprotein K                                       | A0A4X1UTE2 | -0.537037 | 2  | 62 | 0.04311  | Positive regulation of cellular process; transcription factor activity, sequence-specific DNA binding |
| Syndecan                                                                        | F1S0L5     | -0.535399 | 5  | 21 | 0.007086 | Cellular_component:cellular_component;                                                                |
| Uncharacterized protein                                                         | A0A4X1VCI3 | -0.514081 | 1  | 7  | 0.02767  | Function unknown                                                                                      |
| TIMELESS-interacting protein                                                    | A0A287BGF4 | -0.511401 | 3  | 8  | 0.02252  | Negative regulation of cellular process                                                               |
| Thymosin beta-4                                                                 | Q95274     | -0.491832 | 3  | 59 | 0.003064 | Positive regulation of cellular process; protein binding                                              |

|                                                            |            |           |    |    |          |                                                                                    |
|------------------------------------------------------------|------------|-----------|----|----|----------|------------------------------------------------------------------------------------|
| Uncharacterized protein                                    | A0A5G2QSQ7 | -0.479801 | 1  | 30 | 0.0225   | Response to stimulus; protein binding                                              |
| Uncharacterized protein                                    | A0A4X1VI11 | -0.471701 | 1  | 5  | 0.02426  | Function unknown                                                                   |
| Integral membrane protein 2                                | F1RK12     | -0.471287 | 2  | 73 | 0.02785  | Negative regulation of cellular process; binding                                   |
| ATP-binding cassette sub-family F member 1 isoform X1      | A0A480K1E2 | -0.465445 | 2  | 46 | 0.01248  | Regulation of nitrogen compound metabolic process; ribonucleotide binding          |
| Hydroperoxy icosatetraenoate dehydratase                   | F1SIE9     | -0.454951 | 13 | 27 | 0.001535 | Hydrogen peroxide metabolic process; binding                                       |
| SPARC                                                      | P20112     | -0.454331 | 14 | 47 | 0.004519 | Calcium ion binding                                                                |
| Tyrosine-protein kinase receptor                           | A0A480U2S6 | -0.443617 | 3  | 5  | 0.01908  | Function unknown                                                                   |
| Uncharacterized protein                                    | A0A4X1V3D9 | -0.439777 | 6  | 53 | 0.02406  | Function unknown                                                                   |
| Glucose-6-phosphate 1-dehydrogenase                        | A0A0B8RVW4 | -0.439304 | 2  | 68 | 0.04662  | Function unknown                                                                   |
| Proteasome subunit alpha type                              | F2Z5N0     | -0.434372 | 3  | 59 | 0.0341   | Muscle tissue development; peptidase activity, acting on L-amino acid peptides     |
| Hepatocyte nuclear factor 1-beta                           | A0A4X1T4P3 | -0.431195 | 1  | 24 | 0.02259  | Function unknown                                                                   |
| DNA-directed RNA polymerases I, II, and III subunit RPABC5 | A0A4X1VYD0 | -0.428678 | 2  | 30 | 0.03602  | Aromatic compound biosynthetic process; zinc ion binding                           |
| 6-pyruvoyl tetrahydrobiopterin synthase                    | A0A4X1TBY4 | -0.42707  | 6  | 46 | 0.005413 | Organic hydroxy compound metabolic process; protein binding                        |
| Ribosomal protein S6 kinase                                | I3LS09     | -0.423196 | 2  | 3  | 0.003568 | Binding                                                                            |
| Solute carrier family 3 member 1                           | B2D2K8     | -0.421081 | 10 | 17 | 0.001091 | Function unknown                                                                   |
| Hepatocyte nuclear factor 1-                               | A0A5G2R7E8 | -0.419994 | 1  | 19 | 0.02184  | Positive regulation of transcription, DNA-templated; heterocyclic compound binding |

|                                              |            |           |    |    |          |                                                                                  |
|----------------------------------------------|------------|-----------|----|----|----------|----------------------------------------------------------------------------------|
| beta                                         |            |           |    |    |          |                                                                                  |
| Gag protein                                  | R4JTP7     | -0.4183   | 2  | 24 | 0.0376   | Symbiosis, encompassing mutualism through parasitism; binding                    |
| Uncharacterized protein                      | A0A5G2RKV1 | -0.401257 | 1  | 20 | 0.02429  | Function unknown                                                                 |
| PKS_ER domain-containing protein             | A0A4X1U010 | -0.399864 | 1  | 5  | 0.02424  | Metabolic process; protein dimerization activity                                 |
| PCNA-associated factor                       | A0A5G2QZV8 | -0.398    | 1  | 6  | 0.008994 | Regulation of biological process                                                 |
| Autophagy-related protein 3                  | A0A480PFQ0 | -0.392698 | 7  | 34 | 0.006294 | Negative regulation of cellular process; catalytic activity, acting on a protein |
| Glutathione transferase                      | F1RL37     | -0.392157 | 4  | 16 | 0.01781  | Organic substance metabolic process                                              |
| Tetraspanin-13                               | F1SEI8     | -0.391466 | 3  | 21 | 0.01072  | Function unknown                                                                 |
| CBFD_NFYB_HMF domain-containing protein      | A0A5G2QBZ0 | -0.387762 | 4  | 24 | 0.04324  | Regulation of macromolecule biosynthetic process; heterocyclic compound binding  |
| APC-binding protein EB1                      | F6Q3L0     | -0.385105 | 12 | 57 | 0.0161   | Positive regulation of cellular component biogenesis; tubulin binding            |
| Envelope protein                             | Q6W4V3     | -0.38431  | 4  | 38 | 0.03044  | Cellular_component:cellular_component                                            |
| Importin-7                                   | I3LDM3     | -0.38163  | 5  | 45 | 0.004492 | Response to stimulus; protein binding                                            |
| VPS10 domain-containing protein              | A0A287A1U0 | -0.378575 | 11 | 13 | 0.00172  | Function unknown                                                                 |
| Rab GDP dissociation inhibitor               | I3L893     | -0.373655 | 15 | 64 | 0.006841 | Negative regulation of cellular process; enzyme regulator activity               |
| Eukaryotic translation initiation factor 4H  | I3LRD5     | -0.372767 | 10 | 38 | 0.001385 | Multi-organism reproductive process; translation initiation factor activity      |
| Uncharacterized protein                      | A0A286ZPG4 | -0.369254 | 2  | 68 | 0.0343   | Cellular component organization; protein binding                                 |
| Protein phosphatase 1 regulatory subunit 14B | Q8MIK9     | -0.367976 | 3  | 48 | 0.02723  | Protein serine/threonine phosphatase inhibitor activity                          |
| Uncharacterized protein                      | A0A287APU9 | -0.366285 | 3  | 5  | 0.0314   | Function unknown                                                                 |
| WD_REPEATS_REGION domain-containing protein  | A0A4X1W8T2 | -0.366168 | 4  | 12 | 0.001112 | Function unknown                                                                 |
| Protein S100                                 | A0A4X1VVF5 | -0.365378 | 4  | 34 | 0.0126   | Response to stimulus; metal ion binding                                          |

|                                                      |            |           |    |    |          |                                                                  |
|------------------------------------------------------|------------|-----------|----|----|----------|------------------------------------------------------------------|
| Protein S100 (Fragment)                              | A0A480ZBF9 | -0.362396 | 5  | 29 | 0.01537  | Positive regulation of cellular process; receptor binding        |
| Small EDRK-rich factor 1 isoform 2                   | A0A480K1R7 | -0.360411 | 1  | 13 | 0.0115   | Function unknown                                                 |
| Uncharacterized protein                              | A0A4X1UY47 | -0.358777 | 3  | 4  | 0.003993 | Function unknown                                                 |
| Fatty acid-binding protein, heart                    | O02772     | -0.354665 | 8  | 86 | 0.008223 | Cellular_component:cytoplasm; binding                            |
| Fructose-bisphosphate aldolase                       | A0A4X1U602 | -0.349246 | 1  | 69 | 0.03048  | ATP generation from ADP; fructose-bisphosphate aldolase activity |
| Uncharacterized protein                              | A0A4X1SXE8 | -0.349142 | 3  | 28 | 0.001458 | Catabolic process;                                               |
| Jupiter microtubule associated homolog 1 isoform 1   | A0A480VV84 | -0.347829 | 5  | 64 | 0.001733 | Function unknown                                                 |
| UBC core domain-containing protein                   | A0A5G2RGI4 | -0.345932 | 4  | 58 | 0.004976 | Function unknown                                                 |
| Proteasome assembly chaperone 1                      | I3LT95     | -0.345219 | 6  | 29 | 0.03587  | Function unknown                                                 |
| ANK_REP_REGION domain-containing protein             | A0A4X1VC59 | -0.343459 | 6  | 24 | 0.0416   | Response to endoplasmic reticulum stress                         |
| Low-density lipoprotein receptor-related protein 2   | C0HL13     | -0.341928 | 2  | 24 | 0.02891  | Function unknown                                                 |
| Heterogeneous nuclear ribonucleoprotein D0 isoform c | A0A480M1B4 | -0.341029 | 15 | 50 | 0.03272  | Molecular_function:organic cyclic compound binding; RNA binding  |
| Mannose-1-phosphate guanyltransferase alpha          | A0A480QK53 | -0.339951 | 3  | 27 | 0.04944  | Function unknown                                                 |
| PPP1R35_C domain-containing protein                  | A0A4X1UE31 | -0.33722  | 1  | 3  | 0.02551  | Negative regulation of cellular process; protein binding         |
| Uncharacterized protein                              | A0A5G2RAN0 | -0.334439 | 8  | 22 | 0.004152 | Positive regulation of cellular process                          |

|                                           |            |           |    |    |          |                                                                                                                         |
|-------------------------------------------|------------|-----------|----|----|----------|-------------------------------------------------------------------------------------------------------------------------|
| Uncharacterized protein                   | F1RRD3     | -0.33427  | 1  | 52 | 0.04782  | Function unknown                                                                                                        |
| Annexin                                   | F2Z5C1     | -0.334113 | 22 | 74 | 0.006475 | Response to stimulus; lipid binding                                                                                     |
| Uncharacterized protein                   | A0A4X1SLB5 | -0.333214 | 6  | 21 | 0.02839  | Function unknown                                                                                                        |
| Peptidylprolyl isomerase                  | I3LR51     | -0.331864 | 11 | 43 | 0.02369  | Cellular_component:intracellular membrane-bounded organelle; isomerase activity                                         |
| Small nuclear ribonucleoprotein Sm D3     | A0A4X1V3C3 | -0.331206 | 4  | 48 | 0.04849  | Protein binding                                                                                                         |
| 4a-hydroxytetrahydrobiopterin dehydratase | A0A4X1TCL6 | -0.331086 | 3  | 37 | 0.01264  | Positive regulation of cellular process; phenylalanine 4-monooxygenase activity                                         |
| Splicing factor, arginine/serine-rich 11  | Q19QT0     | -0.326117 | 5  | 13 | 0.001402 | RNA processing; RNA binding                                                                                             |
| DUF4604 domain-containing protein         | A0A4X1TEH0 | -0.32309  | 1  | 7  | 0.02072  | Function unknown                                                                                                        |
| Uncharacterized protein                   | A0A4X1TZ18 | -0.322717 | 1  | 26 | 0.005439 | Function unknown                                                                                                        |
| Meiosis protein 5 homolog                 | A0A4X1TKV7 | -0.322413 | 3  | 22 | 0.001124 | Regulation of nitrogen compound metabolic process; ligand-dependent nuclear receptor transcription coactivator activity |
| Uncharacterized protein                   | I3LNG8     | -0.320585 | 1  | 65 | 0.01913  | Response to organic substance; binding                                                                                  |
| Phosphoglycerate mutase                   | A0A286ZQ31 | -0.31627  | 9  | 38 | 0.00292  | ATP generation from ADP; isomerase activity                                                                             |
| 39S ribosomal protein L33, mitochondrial  | A0A4X1TLP9 | -0.315596 | 3  | 49 | 0.03032  | Translation; structural constituent of ribosome                                                                         |
| Dynamin-like 120 kDa protein, form S1     | F1SFG7     | -0.314733 | 1  | 52 | 0.02394  | Negative regulation of cellular process; pyrophosphatase activity                                                       |
| Craniofacial development protein 1        | A0A5G2R143 | -0.30966  | 7  | 36 | 0.03173  | Function unknown                                                                                                        |
| Triosephosphate isomerase                 | A0A288CFT0 | -0.307356 | 19 | 77 | 0.03669  | Function unknown                                                                                                        |
| Uncharacterized protein                   | A0A4X1TNF0 | -0.306645 | 6  | 80 | 0.02288  | Function unknown                                                                                                        |
| Leukotriene A(4) hydrolase                | K9J6K4     | -0.306507 | 12 | 47 | 0.000167 | Icosanoid biosynthetic process; zinc ion binding                                                                        |

|                                                      |            |           |    |    |          |                                                                                  |
|------------------------------------------------------|------------|-----------|----|----|----------|----------------------------------------------------------------------------------|
| 5-oxoprolinase isoform X1                            | A0A480MWT6 | -0.306491 | 1  | 19 | 0.01972  | Function unknown                                                                 |
| NTF2 domain-containing protein                       | A0A4X1UHL0 | -0.305242 | 5  | 83 | 0.006007 | Positive regulation of cellular process; structural constituent of nuclear pore  |
| Uncharacterized protein                              | A0A4X1U6L2 | -0.303812 | 2  | 1  | 0.007438 | Function unknown                                                                 |
| HIT domain-containing protein                        | F1RKI3     | -0.303653 | 5  | 53 | 0.01566  | Positive regulation of cellular process; catalytic activity                      |
| 15-oxoprostaglandin 13-reductase                     | A0A287B7R3 | -0.303482 | 15 | 57 | 0.02019  | Function unknown                                                                 |
| Uncharacterized protein                              | A0A287B283 | -0.301796 | 10 | 33 | 0.001642 | Function unknown                                                                 |
| Uncharacterized protein                              | A0A4X1UC72 | -0.301053 | 7  | 31 | 0.005238 | Positive regulation of cellular process; repressing transcription factor binding |
| CRIP2                                                | A0A165DE67 | -0.300866 | 8  | 45 | 0.00391  | Molecular_function:cation binding; ion binding                                   |
| Thioredoxin                                          | P82460     | -0.299789 | 8  | 89 | 0.008625 | Negative regulation of cellular process; disulfide oxidoreductase activity       |
| Coiled-coil domain-containing protein 72             | F2Z5V1     | -0.298137 | 2  | 30 | 0.003451 | Function unknown                                                                 |
| Malic enzyme                                         | A0A5G2RAJ8 | -0.297189 | 21 | 54 | 0.002204 | Small molecule metabolic process; malate dehydrogenase (decarboxylating          |
| Actin-related protein 2/3 complex subunit 3          | B5APU8     | -0.296622 | 6  | 35 | 0.01568  | Arp2/3 complex-mediated actin nucleation;                                        |
| J domain-containing protein                          | A0A5G2R2L7 | -0.29571  | 10 | 38 | 0.03685  | Cellular_component:intracellular membrane-bounded organelle; protein binding     |
| Telomerase RNA component interacting RNase isoform 1 | F1SEX4     | -0.294522 | 8  | 48 | 0.004331 | Aromatic compound catabolic process; nuclease activity                           |
| G_PROTEIN_RECEP_F2_4 domain-containing protein       | F1RF36     | -0.294061 | 7  | 14 | 0.0264   | Function unknown                                                                 |
| Annexin                                              | F1SEN1     | -0.293648 | 21 | 74 | 0.005457 | Function unknown                                                                 |
| EKC/KEOPS complex subunit GON7                       | P0C8B5     | -0.293036 | 3  | 48 | 0.01694  | Cellular_component:cellular_component;                                           |
| Hypoxanthine-guanine phosphoribosyltransferase       | Q45FY6     | -0.292491 | 2  | 67 | 0.02459  | Glycosyl compound biosynthetic process; small molecule binding                   |

|                                                      |            |           |    |    |          |                                                                                                        |
|------------------------------------------------------|------------|-----------|----|----|----------|--------------------------------------------------------------------------------------------------------|
| Dynamin GTPase                                       | A0A287B878 | -0.291599 | 2  | 29 | 0.003584 | Function unknown                                                                                       |
| Uncharacterized protein                              | A0A287B8I3 | -0.291042 | 5  | 18 | 0.02272  | Function unknown                                                                                       |
| Protein archease                                     | A0A4X1VY44 | -0.290657 | 2  | 16 | 0.0247   | Function unknown                                                                                       |
| Seryl-tRNA synthetase                                | A0A287BJI6 | -0.29056  | 27 | 53 | 0.01824  | Function unknown                                                                                       |
| Stathmin                                             | Q6DUB7     | -0.289364 | 8  | 46 | 0.009694 | Positive regulation of cellular process; protein binding                                               |
| Transaldolase                                        | A0A287BQ72 | -0.287688 | 12 | 30 | 0.02121  | Function unknown                                                                                       |
| Calponin                                             | A0A4X1VU33 | -0.287374 | 11 | 55 | 0.03544  | Function unknown                                                                                       |
| Uncharacterized protein                              | A0A4X1TSU7 | -0.286066 | 10 | 32 | 0.0114   | Function unknown                                                                                       |
| Threonyl-tRNA synthetase                             | A0A480F5A7 | -0.285505 | 1  | 53 | 0.006431 | Function unknown                                                                                       |
| 14_3_3 domain-containing protein                     | A0A4X1V4V6 | -0.285402 | 11 | 68 | 0.007724 | Positive regulation of cellular process; channel regulator activity                                    |
| Uncharacterized protein                              | A0A4X1UBE7 | -0.284256 | 3  | 38 | 0.000358 | Function unknown                                                                                       |
| Uncharacterized protein                              | A0A286ZQ23 | -0.283241 | 12 | 32 | 0.01607  | Molecular_function:transferase activity, transferring phosphorus-containing groups; catalytic activity |
| ATP-binding cassette sub-family F member 1 isoform a | A0A480PQG3 | -0.282454 | 2  | 46 | 0.03874  | Regulation of nitrogen compound metabolic process; ribonucleotide binding                              |
| LRRcap domain-containing protein                     | A0A4X1TYN7 | -0.28197  | 9  | 34 | 0.03312  | Function unknown                                                                                       |
| Eukaryotic translation initiation factor 3 subunit E | F1S1G0     | -0.281832 | 23 | 60 | 0.03225  | Positive regulation of cellular process; translation factor activity, RNA binding                      |
| RING-type domain-containing protein                  | A0A4X1TVR4 | -0.281054 | 5  | 15 | 0.01428  | Positive regulation of cellular process; transition metal ion binding                                  |
| Uncharacterized protein                              | I3LLQ7     | -0.280242 | 2  | 15 | 0.004602 | Function unknown                                                                                       |
| Annexin                                              | A0A4X1W3B6 | -0.27781  | 24 | 68 | 0.005565 | Icosanoid secretion;                                                                                   |
| MPN domain-containing protein                        | A0A4X1UW55 | -0.276591 | 15 | 61 | 0.02333  | Positive regulation of cellular process; peptidase activity, acting on L-amino acid peptides           |

|                                                  |            |           |    |    |          |                                                                               |
|--------------------------------------------------|------------|-----------|----|----|----------|-------------------------------------------------------------------------------|
| Programmed cell death protein 5                  | A0A481D4P9 | -0.27584  | 9  | 74 | 0.03116  | Positive regulation of cellular process; acetyltransferase activator activity |
| Tyrosine-protein phosphatase non-receptor type   | A0A5G2QDD3 | -0.275827 | 1  | 48 | 0.01236  | Positive regulation of cellular process; insulin receptor binding             |
| Cyclin-dependent kinases regulatory subunit      | A0A4X1W0Z6 | -0.275326 | 2  | 33 | 0.01112  | Positive regulation of cellular process; enzyme regulator activity            |
| Hsp90 chaperone protein kinase-targeting subunit | Q684M6     | -0.273493 | 14 | 43 | 0.004248 | Positive regulation of cellular process; protein binding                      |
| Peptidyl-prolyl cis-trans isomerase              | A0A4X1W0F9 | -0.273478 | 5  | 51 | 0.003075 | Function unknown                                                              |
| PX domain-containing protein                     | A0A286ZKH8 | -0.273338 | 6  | 57 | 0.01169  | Negative regulation of cellular process; protein binding                      |
| Uncharacterized protein                          | F1SGZ8     | -0.27309  | 19 | 56 | 0.002509 | Regulation of cellular component size; protein binding                        |
| CCDC50_N domain-containing protein               | A0A5G2QER5 | -0.272456 | 2  | 3  | 0.03041  | System process;                                                               |
| Transcription factor BTF3                        | A0A287BJ88 | -0.271433 | 10 | 73 | 0.01123  | Multicellular organism development;                                           |
| Cofilin-2                                        | Q5G6V9     | -0.270735 | 11 | 72 | 0.01743  | Positive regulation of cellular process; protein binding                      |
| Uncharacterized protein                          | A0A287B3B5 | -0.270464 | 3  | 5  | 0.001064 | Anatomical structure development; protein dimerization activity               |
| Uncharacterized protein                          | A0A4X1U9S0 | -0.269536 | 2  | 11 | 0.02041  | Cellular component organization or biogenesis;                                |
| Uncharacterized protein                          | A0A4X1U210 | -0.269086 | 14 | 65 | 0.02894  | Signal transduction; phosphatidylglycerol binding                             |
