# Supplementary material for: Comparative Proteomic Analysis Reveals Mx1 Inhibits Senecavirus A Replication in PK-15 Cells by Interacting with the Capsid Proteins VP1, VP2 and VP3
Source: MDPI journal article supplement (doi:10.3390/v14050863), 2022-04-21
Supplement: s1 [file s1]

**Supplementary Table S2 The differentially expressed proteins identified by TMT labeling coupled with LC-MS/MS analysis of PK-15 cells in response to SVA infection at 24 hpi**

| Protein name                                                                     | Uniport<br>accession No. | Log <sub>2</sub> ratios<br>(infection/control) | peptides | Sequence<br>coverage<br>(%) | P-values | functions                                                  |
|----------------------------------------------------------------------------------|--------------------------|------------------------------------------------|----------|-----------------------------|----------|------------------------------------------------------------|
| <b>Upregulated proteins in PK-15-infected cells (a total of 697 proteins)</b>    |                          |                                                |          |                             |          |                                                            |
| Peptidase S1 domain-<br>containing protein                                       | A0A4X1SN34               | 2.095754                                       | 1        | 3                           | 0.01089  | Function unknown                                           |
| Lumican                                                                          | F1SQ09                   | 2.002196                                       | 1        | 5                           | 0.00604  | Positive regulation of cytokine production;                |
| SH3 domain-containing<br>protein                                                 | A0A287AA14               | 1.762886                                       | 1        | 0                           | 0.007784 | Function unknown                                           |
| Nebulin isoform X24                                                              | A0A480QQC5               | 1.688143                                       | 1        | 0                           | 0.01349  | Function unknown                                           |
| DNA topoisomerase I                                                              | I3LTP0                   | 1.667966                                       | 1        | 2                           | 0.007448 | Function unknown                                           |
| Protein S100-A14 isoform X1                                                      | F1SFV3                   | 1.637145                                       | 2        | 15                          | 0.006909 | Positive regulation of cellular process; binding           |
| Interferon-induced GTP-<br>binding protein Mx1                                   | A0A4X1TKB5               | 1.616903                                       | 6        | 78                          | 0.002908 | Receptor metabolic process; catalytic activity             |
| Uncharacterized protein                                                          | A0A4X1U802               | 1.539596                                       | 1        | 0                           | 0.01051  | Function unknown                                           |
| Single-pass membrane and<br>coiled-coil domain-containing<br>protein 1 isoform 1 | A0A287BI98               | 1.535366                                       | 1        | 6                           | 0.001449 | Function unknown                                           |
| 2'-5'-oligoadenylate synthase-<br>like protein isoform a                         | F1RIV0                   | 1.489223                                       | 13       | 44                          | 0.0047   | Defense response to other organism; ribonucleotide binding |
| RNA helicase                                                                     | A0A4X1TN23               | 1.478805                                       | 1        | 3                           | 0.04562  | Helicase activity                                          |
| Ubiquitin-like modifier                                                          | A0A287AB58               | 1.461105                                       | 6        | 50                          | 0.000789 | Positive regulation of cellular process; integrin binding  |

|                                                             |            |          |    |    |          |                                                                          |
|-------------------------------------------------------------|------------|----------|----|----|----------|--------------------------------------------------------------------------|
| Interferon-stimulated protein 60                            | F1SCY2     | 1.455918 | 14 | 41 | 0.001934 | Negative regulation of cellular process; protein binding                 |
| Plasminogen                                                 | P06867     | 1.421735 | 10 | 15 | 0.01642  | peptidase activity, acting on L-amino acid peptides                      |
| Interferon-induced protein with tetratricopeptide repeats 2 | K9J6I9     | 1.410217 | 18 | 34 | 0.005382 | Cellular response to interferon-alpha;                                   |
| Uncharacterized protein                                     | A0A287AZI1 | 1.39369  | 2  | 9  | 0.007273 | Function unknown                                                         |
| DNA_MISMATCH_REPAIR_2 domain-containing protein             | I3L5Z8     | 1.368318 | 2  | 2  | 0.01564  | Function unknown                                                         |
| Uncharacterized protein                                     | A0A4X1V7R2 | 1.367009 | 1  | 0  | 0.01073  | Function unknown                                                         |
| Interferon-stimulated protein 56                            | J7FIC7     | 1.366249 | 30 | 64 | 0.002728 | Regulation of response to stress;                                        |
| RNA helicase                                                | A8CYB8     | 1.346067 | 31 | 41 | 0.002467 | Positive regulation of cellular process; helicase activity               |
| Endoplasmic reticulum chaperone BiP (Fragment)              | P34935     | 1.324592 | 1  | 56 | 0.01383  | Negative regulation of cellular process; protein domain specific binding |
| Uncharacterized protein                                     | A0A4X1TPF1 | 1.323285 | 1  | 2  | 0.01742  | Function unknown                                                         |
| 2'-5' oligoadenylate synthase                               | Q56VQ1     | 1.278108 | 30 | 54 | 0.0112   | Defense response to other organism; ribonucleotide binding               |
| Uncharacterized protein                                     | A0A5G2QLT7 | 1.258677 | 2  | 4  | 0.01937  | Function unknown                                                         |
| FIP-RBD domain-containing protein                           | A0A4X1UDM9 | 1.258556 | 1  | 32 | 0.02606  | Function unknown                                                         |
| Galectin                                                    | A0A287A342 | 1.25283  | 11 | 45 | 0.006949 | Function unknown                                                         |
| Tnp_22_trimer domain-containing protein                     | A0A5G2RBQ9 | 1.2405   | 1  | 3  | 0.002476 | Function unknown                                                         |
| TLDC domain-containing protein                              | I3LMG2     | 1.238744 | 1  | 45 | 0.01206  | Function unknown                                                         |
| FAM184 domain-containing protein                            | I3LV88     | 1.236749 | 1  | 1  | 0.01433  | Function unknown                                                         |

|                                                |            |          |    |    |          |                                                                                                |
|------------------------------------------------|------------|----------|----|----|----------|------------------------------------------------------------------------------------------------|
| C-C motif chemokine<br>(Fragment)              | A1YM33     | 1.23596  | 3  | 47 | 0.008926 | Regulation of phospholipase activity; catalytic activity                                       |
| Uncharacterized protein                        | A0A287B4N8 | 1.231525 | 5  | 40 | 0.00447  | Function unknown                                                                               |
| TCTP domain-containing<br>protein              | A0A4X1UEK2 | 1.217968 | 1  | 19 | 0.003942 | Function unknown                                                                               |
| CCDC66 domain-containing<br>protein            | I3L7C7     | 1.21674  | 1  | 1  | 0.009016 | Function unknown                                                                               |
| Uncharacterized protein                        | A0A4X1WD16 | 1.210578 | 1  | 6  | 0.01314  | Function unknown                                                                               |
| Peptidase A1 domain-<br>containing protein     | A0A4X1T5P4 | 1.206586 | 1  | 3  | 0.005824 | Function unknown                                                                               |
| Noelin-2 isoform 2                             | A0A480XA75 | 1.19701  | 1  | 2  | 0.01006  | Positive regulation of cellular process;                                                       |
| Inflammatory response protein<br>6             | A0A287B6T9 | 1.190487 | 14 | 44 | 0.01034  | Positive regulation of cellular process; protein self-association                              |
| Exocyst complex component 2                    | A0A287AU70 | 1.171492 | 1  | 23 | 0.004869 | Function unknown                                                                               |
| GB1/RHD3-type G domain-<br>containing protein  | A0A287BSF6 | 1.14999  | 2  | 30 | 0.004196 | Ribonucleotide binding                                                                         |
| Vitronectin                                    | P48819     | 1.146206 | 2  | 4  | 0.01448  | Immune system process; scavenger receptor activity                                             |
| Uncharacterized protein                        | A0A5G2QG99 | 1.1435   | 1  | 0  | 0.001562 | Function unknown                                                                               |
| CCHC-type domain-containing<br>protein         | F1SMW0     | 1.11876  | 2  | 3  | 0.0113   | Function unknown                                                                               |
| Caveolin                                       | A0A286ZW86 | 1.118634 | 1  | 45 | 0.01698  | Positive regulation of cellular process; inward rectifier potassium channel inhibitor activity |
| Interferon-induced GTP-<br>binding protein Mx2 | A0A480HPX5 | 1.112414 | 26 | 54 | 0.01405  | Receptor metabolic process; small molecule binding                                             |
| PH domain-containing protein                   | A0A287BS42 | 1.111361 | 1  | 1  | 0.01574  | Regulation of biological process;                                                              |
| Actin-related protein 2                        | A0A4X1WAK2 | 1.108757 | 1  | 40 | 0.02414  | Positive regulation of cellular process; anion binding                                         |
| Uncharacterized protein                        | A0A4X1W7Q7 | 1.097529 | 1  | 2  | 0.008163 | Function unknown                                                                               |

|                                                                                      |            |          |   |    |          |                                                                        |
|--------------------------------------------------------------------------------------|------------|----------|---|----|----------|------------------------------------------------------------------------|
| Apolipoprotein H                                                                     | A0A140TAK8 | 1.089746 | 3 | 13 | 0.02638  | Function unknown                                                       |
| Uncharacterized protein                                                              | A0A4X1V704 | 1.06655  | 1 | 1  | 0.009442 | Function unknown                                                       |
| UBC core domain-containing protein                                                   | A0A5G2Q9I0 | 1.066198 | 6 | 79 | 0.002661 | Ubiquitin-dependent protein catabolic process; ribonucleotide binding  |
| Tubulin beta chain                                                                   | A0A480M929 | 1.061327 | 1 | 81 | 0.04508  | Positive regulation of cellular process; purine ribonucleoside binding |
| ANK_REP_REGION domain-containing protein                                             | A0A4X1U612 | 1.054509 | 1 | 14 | 0.02359  | Function unknown                                                       |
| Arf-GAP with Rho-GAP domain, ANK repeat and PH domain-containing protein 1 isoform c | A0A481BP67 | 1.053495 | 1 | 10 | 0.01588  | Function unknown                                                       |
| TLDC domain-containing protein                                                       | A0A4X1UQ31 | 1.045302 | 7 | 43 | 0.006388 | Function unknown                                                       |
| MHC class I antigen                                                                  | V9PR55     | 1.043605 | 1 | 54 | 0.0176   | Response to stimulus;                                                  |
| DALR anticodon-binding domain-containing protein 3 isoform 1                         | F1SKI7     | 1.039808 | 1 | 2  | 0.002969 | Function unknown                                                       |
| Interferon-induced GTP-binding protein Mx1                                           | A0A481BA72 | 1.038371 | 1 | 77 | 0.04084  | Receptor metabolic process; catalytic activity                         |
| RanGAP1_C domain-containing protein                                                  | A0A5G2R6N4 | 1.038203 | 1 | 48 | 0.006909 | Function unknown                                                       |
| Receptor-binding cancer antigen expressed on SiSo cells                              | F1S1I0     | 1.019673 | 2 | 16 | 0.01793  | Cell death;                                                            |
| Uncharacterized protein                                                              | A0A4X1VBX5 | 1.017506 | 1 | 6  | 0.01983  | Function unknown                                                       |
| Vascular smooth muscle                                                               | Q27HS3     | 1.015738 | 1 | 73 | 0.01209  | Circulatory system process; binding                                    |

|                                                        |            |          |    |    |          |                                                            |
|--------------------------------------------------------|------------|----------|----|----|----------|------------------------------------------------------------|
| alpha-actin (Fragment)                                 |            |          |    |    |          |                                                            |
| 2'-5' oligoadenylate synthase                          | Q5MX78     | 1.007388 | 2  | 27 | 0.002862 | Defense response to other organism; ribonucleotide binding |
| mRNA-capping enzyme                                    | A0A4X1VEE3 | 1.006176 | 3  | 7  | 0.0306   | Function unknown                                           |
| Uncharacterized protein                                | A0A287A6X8 | 1.00551  | 1  | 2  | 0.02216  | Negative regulation of cellular process; protein binding   |
| Armadillo repeat-containing protein 4 isoform X3       | A0A480MFY5 | 1.004878 | 2  | 2  | 0.01857  | Function unknown                                           |
| Tumor-associated calcium signal transducer 2           | F1S7A4     | 1.004316 | 8  | 34 | 0.007059 | Positive regulation of cellular process;                   |
| MAGE domain-containing protein                         | A0A5G2QV82 | 0.997196 | 1  | 7  | 0.0138   | Function unknown                                           |
| Transmembrane protein 147                              | A0A4X1TJ50 | 0.984298 | 2  | 13 | 0.03501  | Function unknown                                           |
| RanBP2-type domain-containing protein                  | A0A4X1US75 | 0.984069 | 1  | 2  | 0.009029 | Function unknown                                           |
| HECT domain-containing protein                         | A0A4X1U9D8 | 0.977991 | 25 | 33 | 0.001319 | Function unknown                                           |
| IRF tryptophan pentad repeat domain-containing protein | A0A5G2RH09 | 0.961219 | 6  | 20 | 0.001988 | Transcription regulator activity                           |
| Uncharacterized protein                                | A0A5G2RNJ9 | 0.959059 | 1  | 2  | 0.03396  | Function unknown                                           |
| Uncharacterized protein                                | A0A287B916 | 0.957965 | 1  | 2  | 0.02765  | Lymphocyte differentiation; heterocyclic compound binding  |
| Calpain catalytic domain-containing protein            | A0A5G2RIY4 | 0.954803 | 1  | 0  | 0.0447   | Function unknown                                           |
| Uncharacterized protein                                | F1SS06     | 0.941919 | 1  | 1  | 0.0113   | Function unknown                                           |
| Phosphoglycerate mutase                                | B5KJG2     | 0.9419   | 1  | 12 | 0.0149   | ATP generation from ADP; isomerase activity                |
| N-terminal kinase-like-binding protein 1               | F1RSD3     | 0.939941 | 3  | 14 | 0.008499 | Function unknown                                           |
| RNA helicase                                           | F1S0P6     | 0.932336 | 12 | 22 | 0.007348 | Positive regulation of cellular process; anion binding     |

|                                                                |            |          |    |    |          |                                                 |
|----------------------------------------------------------------|------------|----------|----|----|----------|-------------------------------------------------|
| RNF111_N domain-containing protein                             | A0A4X1URL2 | 0.927131 | 1  | 6  | 0.01636  | Function unknown                                |
| Uncharacterized protein                                        | A0A4X1VY50 | 0.926466 | 1  | 1  | 0.005985 | Function unknown                                |
| tRNA (guanine(10)-N2)-methyltransferase homolog                | A0A287BI99 | 0.921938 | 2  | 4  | 0.04437  | Methylation; heterocyclic compound binding      |
| MHC class I alpha chain (Fragment)                             | L7UVI0     | 0.918987 | 1  | 15 | 0.02273  | Function unknown                                |
| Gc-globulin                                                    | A0A4X1T9I2 | 0.916498 | 2  | 8  | 0.007916 | Organic cyclic compound binding                 |
| 2',3'-cyclic-nucleotide 3'-phosphodiesterase                   | A0A287A9L8 | 0.908866 | 26 | 59 | 0.007494 | Nucleoside phosphate metabolic process; binding |
| Nuclear autoantigen Sp-100 isoform 4                           | R4L6V8     | 0.908035 | 2  | 28 | 0.03594  | Function unknown                                |
| Pyruvate carboxyltransferase domain-containing protein         | A0A4X1VY76 | 0.907145 | 1  | 53 | 0.006018 | Function unknown                                |
| Uncharacterized protein                                        | A0A4X1UW90 | 0.902167 | 27 | 18 | 0.002423 | Function unknown                                |
| Uncharacterized protein                                        | A0A5G2R653 | 0.89631  | 1  | 1  | 0.01648  | Function unknown                                |
| Hyaluronoglucosaminidase                                       | F1SJB9     | 0.896061 | 3  | 2  | 0.005127 | Function unknown                                |
| GTPase-activating Rap/Ran-GAP domain-like protein 3 isoform X1 | I3LIY1     | 0.89127  | 1  | 1  | 0.01545  | Function unknown                                |
| Ig-like domain-containing protein                              | A0A5G2QW86 | 0.879192 | 2  | 44 | 0.009073 | Biological adhesion;                            |
| GB1/RHD3-type G domain-containing protein                      | A0A4X1U8M2 | 0.875136 | 1  | 6  | 0.004142 | Function unknown                                |
| Reverse transcriptase domain-containing protein                | A0A5G2R2R5 | 0.871792 | 1  | 1  | 0.003504 | Function unknown                                |

|                                 |            |          |    |    |          |                                                                          |
|---------------------------------|------------|----------|----|----|----------|--------------------------------------------------------------------------|
| G domain-containing protein     | F1S9T2     | 0.867466 | 1  | 39 | 0.01867  | GTP binding                                                              |
| RNA helicase                    | A0A287AKR1 | 0.862288 | 20 | 21 | 0.004663 | Binding                                                                  |
| E3 ubiquitin-protein ligase     | A0A480YJW7 | 0.86219  | 27 | 34 | 0.003105 | Function unknown                                                         |
| RNF213 isoform 3                |            |          |    |    |          |                                                                          |
| Receptor-transporting protein   | A0A287B9T3 | 0.854579 | 5  | 12 | 0.01067  | Function unknown                                                         |
| 4                               |            |          |    |    |          |                                                                          |
| Uncharacterized protein         | A0A5G2QYT9 | 0.853551 | 1  | 1  | 0.01099  | Function unknown                                                         |
| Aminopeptidase                  | K9J4P1     | 0.85078  | 7  | 7  | 0.002282 | Function unknown                                                         |
| Galectin-3-binding protein      | A0A5G2RLP2 | 0.847301 | 13 | 34 | 0.003767 | Function unknown                                                         |
| IF rod domain-containing        | F1SGI2     | 0.839965 | 1  | 7  | 0.01498  | Function unknown                                                         |
| protein                         |            |          |    |    |          |                                                                          |
| Phospholipid-transporting       | M3TYF0     | 0.836716 | 1  | 1  | 0.01124  | Function unknown                                                         |
| ATPase                          |            |          |    |    |          |                                                                          |
| UPAR/Ly6 domain-containing      | A0A287B805 | 0.828444 | 3  | 45 | 0.0263   | Function unknown                                                         |
| protein                         |            |          |    |    |          |                                                                          |
| DNA-dependent activator of      | B8XX91     | 0.826025 | 6  | 46 | 0.006158 | Positive regulation of cellular process; organic cyclic compound binding |
| IFN-regulatory factor           |            |          |    |    |          |                                                                          |
| J domain-containing protein     | A0A5G2R4I8 | 0.825097 | 1  | 42 | 0.008812 | Function unknown                                                         |
| Zinc finger protein 555 isoform | A0A287A1D7 | 0.818426 | 1  | 6  | 0.007455 | Function unknown                                                         |
| 2                               |            |          |    |    |          |                                                                          |
| Glutamine--fructose-6-          | F1S5Q1     | 0.808733 | 2  | 12 | 0.01463  | Fructose 6-phosphate metabolic process; binding                          |
| phosphate transaminase          |            |          |    |    |          |                                                                          |
| (isomerizing)                   |            |          |    |    |          |                                                                          |
| Uncharacterized protein         | A0A4X1TX07 | 0.800669 | 2  | 14 | 0.006103 | Function unknown                                                         |
| ATP-sulfurylase                 | A0A481BE86 | 0.797814 | 1  | 4  | 0.01205  | Function unknown                                                         |
| Beta-2-microglobulin            | A0A4X1VG41 | 0.793611 | 3  | 32 | 0.005311 | Positive regulation of cellular process; protein binding                 |

|                                                             |            |          |    |    |          |                                                                      |
|-------------------------------------------------------------|------------|----------|----|----|----------|----------------------------------------------------------------------|
| Transporter 2, ATP-binding cassette, sub-family B (MDR/TAP) | A5D9J7     | 0.792526 | 16 | 31 | 0.005508 | Immune system process; ribonucleotide binding                        |
| Putative E3 ubiquitin-protein ligase HERC6 isoform 1        | A0A480M1Q1 | 0.78479  | 1  | 33 | 0.004606 | Function unknown                                                     |
| Protein PML isoform 2                                       | A0A480JXC7 | 0.784643 | 2  | 50 | 0.002311 | Function unknown                                                     |
| Guanylate binding protein 2                                 | B2XWS2     | 0.780767 | 5  | 20 | 0.00843  | Ribonucleotide binding                                               |
| Tumor necrosis factor receptor superfamily member 5         | Q8SQ34     | 0.77975  | 6  | 30 | 0.008496 | Positive regulation of cellular process; signaling receptor activity |
| Thioredoxin domain-containing protein                       | A0A4X1V5Q8 | 0.772105 | 1  | 10 | 0.005117 | Function unknown                                                     |
| Exonuclease domain-containing protein                       | A0A4X1W796 | 0.771227 | 7  | 46 | 0.02134  | Function unknown                                                     |
| Uncharacterized protein                                     | A0A286ZSL2 | 0.770362 | 1  | 36 | 0.01867  | Function unknown                                                     |
| Uncharacterized protein                                     | A0A4X1SE52 | 0.768832 | 1  | 42 | 0.002574 | Localization;                                                        |
| Uncharacterized protein                                     | A0A4X1U2C6 | 0.754016 | 1  | 3  | 0.012    | Function unknown                                                     |
| Hemoglobin subunit epsilon                                  | F1RII6     | 0.750849 | 1  | 13 | 0.0139   | Hydrogen peroxide metabolic process; protein binding                 |
| Uncharacterized protein                                     | F1RW93     | 0.749613 | 1  | 2  | 0.01987  | Function unknown                                                     |
| Malic enzyme                                                | A0A4X1UJU2 | 0.744403 | 1  | 65 | 0.005259 | Function unknown                                                     |
| Aprotinin (Fragment)                                        | B0LXF7     | 0.744352 | 1  | 26 | 0.03092  | Enzyme regulator activity                                            |
| VLIG-type G domain-containing protein                       | F1RMQ6     | 0.742851 | 9  | 4  | 0.000902 | Function unknown                                                     |
| Olfactory receptor                                          | A0A5G2QYK1 | 0.741943 | 1  | 2  | 0.009285 | Function unknown                                                     |
| Heat shock protein HSP 90-alpha isoform 2-like              | A0A480TUW8 | 0.735092 | 1  | 13 | 0.02327  | Ribonucleotide binding                                               |
| Hemoglobin subunit theta-1                                  | K7GNR8     | 0.733608 | 1  | 11 | 0.03237  | Hydrogen peroxide metabolic process; organic cyclic compound binding |

|                                                     |            |          |   |    |          |                                                                 |
|-----------------------------------------------------|------------|----------|---|----|----------|-----------------------------------------------------------------|
| Protein FMC1 homolog<br>(Fragment)                  | A0A480XJB3 | 0.733483 | 4 | 26 | 0.00932  | Regulation of lipid catabolic process;                          |
| MHC class I antigen<br>(Fragment)                   | A0A3G5MTB4 | 0.731139 | 2 | 55 | 0.01274  | Response to stimulus;                                           |
| Protein MCM10 homolog                               | A0A287AY37 | 0.730859 | 3 | 3  | 0.01106  | Function unknown                                                |
| Uncharacterized protein                             | A0A4X1URS1 | 0.730638 | 1 | 42 | 0.01263  | Function unknown                                                |
| Uncharacterized protein                             | F2Z552     | 0.725114 | 1 | 8  | 0.005349 | Protein transport; small molecule binding                       |
| Alpha-2-macroglobulin isoform<br>a                  | A0A480SMD8 | 0.722901 | 4 | 2  | 0.02073  | Function unknown                                                |
| Apolipoprotein D                                    | A0A5K1TWC1 | 0.720607 | 3 | 14 | 0.01074  | Negative regulation of cellular process; small molecule binding |
| Uncharacterized protein                             | A0A287B544 | 0.720041 | 2 | 38 | 0.006339 | Function unknown                                                |
| Urokinase-type plasminogen<br>activator             | A0A286ZXK2 | 0.718426 | 9 | 24 | 0.004307 | Function unknown                                                |
| 2'-5'-oligoadenylate synthase<br>1                  | Q29599     | 0.71791  | 3 | 45 | 0.001829 | Negative regulation of viral process; 2'-5'-oli                 |
| VWFA domain-containing<br>protein                   | A0A4X1SK62 | 0.716987 | 1 | 9  | 0.01315  | Function unknown                                                |
| ASD2 domain-containing<br>protein                   | A0A4X1TVX4 | 0.715689 | 1 | 13 | 0.01975  | Function unknown                                                |
| Uncharacterized protein                             | A0A5G2QJA8 | 0.711525 | 1 | 1  | 0.01583  | Function unknown                                                |
| Calponin-homology (CH)<br>domain-containing protein | A0A5G2QI59 | 0.71064  | 7 | 9  | 0.002304 | Function unknown                                                |
| Calponin 3, acidic (Fragment)                       | A4H2I3     | 0.709918 | 1 | 83 | 0.01701  | Cellular component organization; calmodulin binding             |
| MHC class I antigen<br>(Fragment)                   | K9LRJ6     | 0.709883 | 3 | 42 | 0.003054 | Response to stimulus;                                           |
| Tetratricopeptide repeat                            | A0A287AVL3 | 0.70685  | 1 | 1  | 0.01101  | Binding                                                         |

|                                                                 |            |          |    |    |          |                                                                                      |
|-----------------------------------------------------------------|------------|----------|----|----|----------|--------------------------------------------------------------------------------------|
| protein 14 isoform a                                            |            |          |    |    |          |                                                                                      |
| Splicing factor 1                                               | A0A480TKX0 | 0.699274 | 4  | 34 | 0.006672 | Function unknown                                                                     |
| XIAP-associated factor 1                                        | K9IVW8     | 0.69877  | 6  | 29 | 0.006508 | Function unknown                                                                     |
| TPR_REGION domain-<br>containing protein                        | A0A4X1U2X7 | 0.6981   | 3  | 9  | 0.002928 | Function unknown                                                                     |
| C3-beta-c                                                       | I3LTB8     | 0.697496 | 4  | 2  | 0.008172 | Positive regulation of cellular process; peptidase inhibitor activity                |
| Proteasome subunit beta                                         | Q09YA9     | 0.689807 | 7  | 33 | 0.002464 | Macromolecule metabolic process; peptidase activity, acting on L-amino acid peptides |
| Uncharacterized protein                                         | A0A287BNI5 | 0.689555 | 3  | 11 | 0.01749  | Ion binding                                                                          |
| Poly [ADP-ribose] polymerase                                    | A0A4X1TD13 | 0.689547 | 45 | 31 | 0.01362  | Function unknown                                                                     |
| Uncharacterized protein                                         | A0A5G2QK26 | 0.68795  | 1  | 1  | 0.008673 | Function unknown                                                                     |
| Tudor domain-containing                                         | A0A4X1UP96 | 0.68377  | 5  | 5  | 0.002886 | Function unknown                                                                     |
| protein 7                                                       |            |          |    |    |          |                                                                                      |
| UBA domain-containing                                           | F1RF72     | 0.679476 | 8  | 2  | 0.02902  | Function unknown                                                                     |
| protein                                                         |            |          |    |    |          |                                                                                      |
| Uncharacterized protein                                         | A0A4X1T910 | 0.679297 | 1  | 44 | 0.01265  | Function unknown                                                                     |
| Uncharacterized protein                                         | A0A287BKF1 | 0.667257 | 24 | 42 | 0.002159 | Ribonucleotide binding                                                               |
| Brain-specific angiogenesis<br>inhibitor 1-associated protein 2 | A0A4X1UGQ7 | 0.665602 | 1  | 56 | 0.03568  | Cellular component organization or biogenesis; binding, bridging                     |
| Insulin                                                         | P01315     | 0.661432 | 2  | 26 | 0.01765  | Positive regulation of protein phosphorylation; hormone activity                     |
| GFO_IDH_MocA domain-<br>containing protein                      | A0A4X1UEI6 | 0.657793 | 1  | 2  | 0.00988  | Extracellular structure organization; oxidoreductase activity                        |
| Histone domain-containing                                       | F2Z581     | 0.656549 | 1  | 40 | 0.02174  | Function unknown                                                                     |
| protein                                                         |            |          |    |    |          |                                                                                      |
| Tumor necrosis factor receptor<br>superfamily member 10C        | A0A480PT21 | 0.653754 | 1  | 6  | 0.008974 | Function unknown                                                                     |
| Protein-serine/threonine                                        | A0A4X1U1Y2 | 0.653698 | 1  | 1  | 0.04828  | Function unknown                                                                     |

|                                                     |            |          |    |    |          |                                                             |
|-----------------------------------------------------|------------|----------|----|----|----------|-------------------------------------------------------------|
| phosphatase                                         |            |          |    |    |          |                                                             |
| Uncharacterized protein                             | A0A4X1TA69 | 0.652608 | 1  | 4  | 0.0057   | Function unknown                                            |
| Importin N-terminal domain-<br>containing protein   | A0A4X1ST59 | 0.648874 | 1  | 43 | 0.01055  | Response to stimulus; protein binding                       |
| RING-type domain-containing<br>protein              | A0A287B7H5 | 0.648472 | 1  | 2  | 0.01525  | Function unknown                                            |
| Uncharacterized protein                             | A0A4X1T205 | 0.644381 | 8  | 35 | 0.006028 | Function unknown                                            |
| Ig-like domain-containing<br>protein                | A0A287A1Y1 | 0.64352  | 6  | 23 | 0.007126 | Antigen processing and presentation of peptide antigen;     |
| Protein BANP                                        | A0A481CG23 | 0.642619 | 2  | 6  | 0.01221  | Function unknown                                            |
| Uncharacterized protein                             | A0A5G2QTL6 | 0.638555 | 2  | 4  | 0.03239  | Function unknown                                            |
| Caspase 4, apoptosis-related<br>cysteine peptidase  | A0A0B8RT56 | 0.638371 | 9  | 28 | 0.006323 | Function unknown                                            |
| Gap junction protein                                | A0A4X1UIU1 | 0.637867 | 1  | 2  | 0.002131 | Function unknown                                            |
| Ubiquitin-like domain-<br>containing protein        | A0A286ZQW6 | 0.637211 | 2  | 10 | 0.04855  | Function unknown                                            |
| Protein fem-1 homolog B                             | I3L6T4     | 0.637055 | 5  | 10 | 0.008316 | Morphogenesis of an epithelium; receptor binding            |
| Reverse transcriptase domain-<br>containing protein | A0A5G2QY09 | 0.635111 | 1  | 3  | 0.01252  | Function unknown                                            |
| Chimaerin                                           | A0A287BPP5 | 0.632997 | 2  | 6  | 0.008372 | Regulation of hydrolase activity; enzyme activator activity |
| Uncharacterized protein                             | A0A4X1V406 | 0.632853 | 20 | 37 | 0.004303 | Peptide transport; ribonucleotide binding                   |
| PARP-1 binding protein                              | A0A5G2QYX1 | 0.632309 | 1  | 1  | 0.003179 | Function unknown                                            |
| Uncharacterized protein                             | F1RGY5     | 0.631977 | 2  | 3  | 0.03758  | Function unknown                                            |
| Guanine nucleotide-binding<br>protein subunit gamma | A0A287AHC5 | 0.631851 | 1  | 16 | 0.0215   | Signal transduction; protein binding                        |
| Uncharacterized protein                             | A0A4X1U6K0 | 0.62951  | 3  | 10 | 0.007294 | Function unknown                                            |

|                                                         |            |          |    |    |          |                                                                                |
|---------------------------------------------------------|------------|----------|----|----|----------|--------------------------------------------------------------------------------|
| Proteasome subunit beta                                 | Q2PYM7     | 0.629085 | 6  | 37 | 0.004456 | Protein catabolic process; peptidase activity, acting on L-amino acid peptides |
| Uncharacterized protein                                 | A0A4X1U946 | 0.626116 | 1  | 2  | 0.02467  | Trans-synaptic signaling; transmembrane transporter activity                   |
| Histone acetyltransferase                               | A0A4X1UTM8 | 0.625832 | 10 | 26 | 0.01251  | Positive regulation of cellular process; DNA binding                           |
| Uncharacterized protein                                 | A0A4X1T995 | 0.624912 | 1  | 0  | 0.001512 | Cellular cation homeostasis; cadherin binding                                  |
| Heme oxygenase 1                                        | P32394     | 0.624023 | 1  | 47 | 0.02466  | Positive regulation of cellular process; protein binding                       |
| Uncharacterized protein                                 | F1RM98     | 0.622442 | 6  | 19 | 0.04238  | Positive regulation of cellular process; protein binding                       |
| EEF1A lysine<br>methyltransferase 1                     | A0A481DEK1 | 0.615495 | 4  | 21 | 0.002142 | Function unknown                                                               |
| COAgulation factor III<br>(Fragment)                    | A0A481D288 | 0.615129 | 3  | 15 | 0.01221  | Positive regulation of cellular process; lipid binding                         |
| Voltage-dependent anion-<br>selective channel protein 2 | A0A4X1UZQ9 | 0.60917  | 1  | 15 | 0.03272  | Function unknown                                                               |
| Protein FAM25A                                          | K7N7E8     | 0.607621 | 1  | 8  | 0.02375  | Function unknown                                                               |
| Nuclear body protein SP140<br>isoform 5                 | A0A480PYU5 | 0.6041   | 5  | 26 | 0.006619 | Function unknown                                                               |
| Alpha-mannosidase                                       | A0A4X1UCM9 | 0.603523 | 3  | 5  | 0.02163  | Metabolic process; binding                                                     |
| GTSE1_N domain-containing<br>protein                    | F1SM83     | 0.601089 | 2  | 3  | 0.005892 | Function unknown                                                               |
| Laminin subunit gamma-2<br>isoform a                    | F1S662     | 0.600727 | 36 | 38 | 0.01031  | Function unknown                                                               |
| Uncharacterized protein                                 | A0A5G2R0A9 | 0.598038 | 23 | 55 | 0.004554 | Function unknown                                                               |
| J domain-containing protein                             | A0A4X1VG11 | 0.596897 | 5  | 46 | 0.02307  | Function unknown                                                               |
| Guanine nucleotide-binding<br>protein subunit gamma     | A0A4X1UZS2 | 0.591926 | 1  | 13 | 0.01169  | Pyrophosphatase activity                                                       |
| Uncharacterized protein                                 | A0A4X1U1R2 | 0.589318 | 3  | 14 | 0.004437 | Lipid biosynthetic process;                                                    |
| SAM domain-containing                                   | A0A4X1U5A2 | 0.585019 | 7  | 6  | 0.004913 | Function unknown                                                               |

|                                                       |            |          |    |    |          |                                                                                                                         |
|-------------------------------------------------------|------------|----------|----|----|----------|-------------------------------------------------------------------------------------------------------------------------|
| protein                                               |            |          |    |    |          |                                                                                                                         |
| Uncharacterized protein                               | F1SM15     | 0.584501 | 1  | 1  | 0.01584  | Function unknown                                                                                                        |
| Tubulin alpha chain                                   | A0A480IZE0 | 0.584499 | 1  | 61 | 0.00046  | Cytoskeleton organization; ribonucleotide binding                                                                       |
| 60S ribosomal protein L7<br>(Fragment)                | Q6QAS9     | 0.58128  | 1  | 73 | 0.008241 | RNA processing; mRNA binding                                                                                            |
| Uncharacterized protein                               | A0A4X1V1X7 | 0.578954 | 3  | 5  | 0.008549 | Function unknown                                                                                                        |
| MHC class I antigen                                   | A1YH92     | 0.578221 | 4  | 22 | 0.01086  | Function unknown                                                                                                        |
| Clusterin                                             | A0A5S8KLN1 | 0.57565  | 12 | 34 | 0.01098  | Positive regulation of cellular process; receptor binding                                                               |
| Epithelial-stromal interaction<br>protein 1 isoform 2 | A0A286ZSG6 | 0.572979 | 9  | 34 | 0.01382  | Function unknown                                                                                                        |
| Cytoplasmic protein                                   | B6E314     | 0.570357 | 7  | 21 | 0.006    | Positive regulation of cellular process; scaffold protein binding                                                       |
| Uncharacterized protein                               | A0A4X1SWR6 | 0.569595 | 1  | 6  | 0.008597 | Function unknown                                                                                                        |
| Uncharacterized protein                               | A0A287A746 | 0.569388 | 3  | 15 | 0.002844 | Ion binding                                                                                                             |
| Gap junction alpha-1 protein                          | Q29101     | 0.569258 | 1  | 2  | 0.003219 | Regulation of hormone secretion; gap junction channel activity involved in cell<br>communication by electrical coupling |
| Inhibitor_Mig-6 domain-<br>containing protein         | A0A287A7S3 | 0.568911 | 2  | 4  | 0.007559 | Function unknown                                                                                                        |
| Uncharacterized protein                               | I3L5Z9     | 0.56788  | 60 | 42 | 0.003027 | Function unknown                                                                                                        |
| LRRC37AB_C domain-<br>containing protein              | A0A286ZIV7 | 0.567458 | 2  | 2  | 0.01504  | Function unknown                                                                                                        |
| Letm1 RBD domain-containing<br>protein                | A0A286ZLJ0 | 0.561894 | 6  | 21 | 0.01742  | Function unknown                                                                                                        |
| IFITM2                                                | F4ZS15     | 0.561801 | 1  | 28 | 0.004448 | Function unknown                                                                                                        |
| Beta actin (Fragment)                                 | Q00P29     | 0.556737 | 2  | 76 | 0.01765  | Cellular process; ribonucleotide binding                                                                                |
| Z-DNA-binding protein 1                               | A0A481BW17 | 0.555088 | 2  | 39 | 0.0258   | Function unknown                                                                                                        |
| Protein kinase domain-                                | A0A4X1V4D9 | 0.554621 | 2  | 2  | 0.04161  | Function unknown                                                                                                        |

|                                 |            |          |    |    |          |                                                                       |
|---------------------------------|------------|----------|----|----|----------|-----------------------------------------------------------------------|
| containing protein              |            |          |    |    |          |                                                                       |
| Uncharacterized protein         | A0A287BDP1 | 0.553491 | 1  | 25 | 0.008122 | Function unknown                                                      |
| Pyroglutamyl-peptidase I        | A0A4X1U7H9 | 0.553212 | 2  | 14 | 0.01245  | Proteolysis; cysteine-type peptidase activity                         |
| Ras-related protein Rab-4       | A0A287AKG6 | 0.551806 | 3  | 22 | 0.03473  | Protein transport; binding                                            |
| GTP_EFTU_D3 domain-             | A0A287AVL5 | 0.550003 | 1  | 10 | 0.03904  | Function unknown                                                      |
| containing protein              |            |          |    |    |          |                                                                       |
| G_PROTEIN_RECEP_F3_4            | A0A4X1V7D7 | 0.54899  | 4  | 14 | 0.009145 | Function unknown                                                      |
| domain-containing protein       |            |          |    |    |          |                                                                       |
| Proline dehydrogenase           | M3V806     | 0.547023 | 8  | 18 | 0.01122  | Function unknown                                                      |
| Component of oligomeric         | A0A480K7Y8 | 0.546559 | 10 | 17 | 0.004555 | Function unknown                                                      |
| Golgi complex 2                 |            |          |    |    |          |                                                                       |
| Nitric-oxide synthase           | B4YYD8     | 0.546437 | 1  | 1  | 0.02967  | Nitric oxide metabolic process; ribonucleotide binding                |
| (NADPH) (Fragment)              |            |          |    |    |          |                                                                       |
| Tripartite motif-containing     | B6ICV1     | 0.546423 | 5  | 11 | 0.01711  | Binding                                                               |
| protein 26                      |            |          |    |    |          |                                                                       |
| MYND-type domain-containing     | A0A4X1VY99 | 0.545046 | 5  | 18 | 0.004317 | Function unknown                                                      |
| protein                         |            |          |    |    |          |                                                                       |
| Serine incorporator 3           | A0A480PEC3 | 0.542177 | 2  | 3  | 0.01381  | Function unknown                                                      |
| AMMECR1 domain-containing       | A0A4X1VSW4 | 0.541137 | 3  | 17 | 0.04605  | Function unknown                                                      |
| protein                         |            |          |    |    |          |                                                                       |
| NHL repeat-containing protein   | A0A480W0M6 | 0.540654 | 3  | 12 | 0.02236  | Function unknown                                                      |
| 3 isoform a                     |            |          |    |    |          |                                                                       |
| Beta-1,4-N-                     | A0A4X1UFA5 | 0.539373 | 2  | 3  | 0.01853  | Function unknown                                                      |
| acetylgalactosaminyltransferase |            |          |    |    |          |                                                                       |
| e                               |            |          |    |    |          |                                                                       |
| Metalloproteinase inhibitor 3   | A0A286ZZX3 | 0.539097 | 3  | 12 | 0.007234 | Positive regulation of cellular process; peptidase inhibitor activity |

|                                                   |            |          |    |    |          |                                                                                                       |
|---------------------------------------------------|------------|----------|----|----|----------|-------------------------------------------------------------------------------------------------------|
| Interferon regulatory factor 7                    | X2KPB3     | 0.537999 | 2  | 5  | 0.04072  | Positive regulation of cellular process; transcription factor activity, sequence-specific DNA binding |
| Vitellogenin domain-containing protein            | F1SCV9     | 0.536874 | 16 | 3  | 0.01622  | Function unknown                                                                                      |
| Plasminogen activator                             | A0A4X1U9U8 | 0.53583  | 10 | 27 | 0.001867 | Function unknown                                                                                      |
| Integrator complex subunit 14                     | A0A5K1U644 | 0.533571 | 5  | 16 | 0.01616  | Function unknown                                                                                      |
| Prothrombin                                       | A0A4X1VLZ9 | 0.533522 | 6  | 9  | 0.008014 | Response to stimulus; peptidase activity, acting on L-amino acid peptides                             |
| Pleckstrin homology-like domain family A member 1 | F1SGD8     | 0.530407 | 1  | 2  | 0.02872  | Function unknown                                                                                      |
| Sphingosine-1-phosphate phosphatase 2 isoform a   | A0A5G2QIU3 | 0.529836 | 5  | 13 | 0.018    | Function unknown                                                                                      |
| CD70 antigen                                      | Q3ZDR4     | 0.529013 | 1  | 7  | 0.02025  | Response to stimulus; binding                                                                         |
| Translocon-associated protein subunit beta        | A0A480W8D2 | 0.528602 | 1  | 3  | 0.04446  | Multicellular organism development;                                                                   |
| Uncharacterized protein                           | A0A2C9F343 | 0.527574 | 1  | 43 | 0.01705  | Function unknown                                                                                      |
| Uncharacterized protein                           | A0A5G2QI85 | 0.526904 | 10 | 68 | 0.002498 | Positive regulation of cellular process; ribonucleotide binding                                       |
| Perilipin                                         | R9WHX5     | 0.526439 | 15 | 34 | 0.007051 | Anion transport;                                                                                      |
| Uncharacterized protein                           | A0A4X1SEB3 | 0.523593 | 13 | 24 | 0.00927  | Function unknown                                                                                      |
| Galectin                                          | A0A286ZYZ8 | 0.522899 | 1  | 38 | 0.03238  | Binding                                                                                               |
| Carbohydrate sulfotransferase                     | A0A4X1TJF6 | 0.522671 | 1  | 2  | 0.01961  | Function unknown                                                                                      |
| Cytospin-A                                        | A0A287B7A6 | 0.521064 | 4  | 5  | 0.02808  | Function unknown                                                                                      |
| ANK_REP_REGION domain-containing protein          | A0A4X1URX0 | 0.520407 | 1  | 1  | 0.007897 | Function unknown                                                                                      |
| Uncharacterized protein                           | A0A4X1SEZ6 | 0.517556 | 4  | 29 | 0.04834  | Positive regulation of cellular process; BH domain binding                                            |
| Uncharacterized protein                           | A0A288CG62 | 0.516676 | 2  | 4  | 0.01819  | Function unknown                                                                                      |
| Lethal(3)malignant brain                          | A0A480QFR5 | 0.516194 | 2  | 2  | 0.04982  | Myeloid cell differentiation; binding                                                                 |

|                                              |            |          |    |    |          |                                                                    |
|----------------------------------------------|------------|----------|----|----|----------|--------------------------------------------------------------------|
| tumor-like protein 3 isoform X2              |            |          |    |    |          |                                                                    |
| Endoribonuclease                             | F1RSL5     | 0.515066 | 2  | 3  | 0.001525 | Function unknown                                                   |
| Uncharacterized protein                      | A0A4X1UQJ8 | 0.51333  | 2  | 10 | 0.02078  | Function unknown                                                   |
| HAUS6_N domain-containing protein            | A0A5G2QNR3 | 0.512145 | 8  | 12 | 0.02495  | Cellular component organization or biogenesis;                     |
| Ras-associating domain-containing protein    | F1SD18     | 0.50894  | 1  | 5  | 0.01616  | Function unknown                                                   |
| CCR4-NOT transcription complex subunit 9     | A0A5G2QHJ4 | 0.507578 | 9  | 34 | 0.004468 | Aromatic compound catabolic process;                               |
| SERPIN domain-containing protein             | A0A4X1U844 | 0.50179  | 7  | 20 | 0.04637  | Function unknown                                                   |
| High affinity copper uptake protein 1        | Q8WNR0     | 0.501739 | 2  | 16 | 0.003504 | Metal ion transport; protein binding                               |
| Protein Spindly                              | A0A4X1U736 | 0.501647 | 5  | 13 | 0.005131 | Function unknown                                                   |
| PH domain-containing protein                 | A0A4X1VUK6 | 0.501609 | 8  | 13 | 0.006281 | Function unknown                                                   |
| Uncharacterized protein                      | A0A4X1SHM4 | 0.501607 | 26 | 47 | 0.001765 | Function unknown                                                   |
| Kinesin-like protein                         | A0A4X1TA22 | 0.501467 | 6  | 12 | 0.02411  | Microtubule-based movement; ribonucleotide binding                 |
| SAP130_C domain-containing protein           | A0A5G2QAV4 | 0.500805 | 3  | 4  | 0.03762  | Function unknown                                                   |
| SHS2_Rpb7-N domain-containing protein        | F1SC14     | 0.498287 | 5  | 18 | 0.01513  | Transcription, DNA-templated; DNA-directed RNA polymerase activity |
| Myeloid cell nuclear differentiation antigen | A0A287AP08 | 0.497784 | 4  | 10 | 0.02617  | Function unknown                                                   |
| Uncharacterized protein                      | F1SL31     | 0.497709 | 1  | 34 | 0.02628  | Function unknown                                                   |
| Uncharacterized protein                      | A0A5G2QH68 | 0.497234 | 1  | 5  | 0.00731  | Function unknown                                                   |
| Phosphodiesterase                            | A0A4X1VR14 | 0.495354 | 1  | 1  | 0.008118 | Regulation of cellular process; binding                            |

|                                                               |            |          |   |    |          |                                                                                    |
|---------------------------------------------------------------|------------|----------|---|----|----------|------------------------------------------------------------------------------------|
| RING-type E3 ubiquitin transferase                            | A0A287B425 | 0.494488 | 1 | 8  | 0.04555  | Function unknown                                                                   |
| Glyco_transf_24 domain-containing protein                     | A0A5G2Q988 | 0.492664 | 1 | 49 | 0.02776  | Protein modification process; transferase activity, transferring hexosyl groups    |
| Chitinase                                                     | A0A4X1TAK5 | 0.492333 | 1 | 3  | 0.04343  | Function unknown                                                                   |
| Ribosomal_L7Ae domain-containing protein                      | I3LCJ7     | 0.490658 | 5 | 31 | 0.002925 | RNA processing; organic cyclic compound binding                                    |
| Uncharacterized protein                                       | A0A4X1UUL9 | 0.489252 | 1 | 30 | 0.01451  | Function unknown                                                                   |
| BTB domain-containing protein                                 | A0A287B5G3 | 0.489103 | 7 | 14 | 0.01527  | Negative regulation of cell communication;                                         |
| Endo/exonuclease/phosphatase domain-containing protein        | A0A4X1V6E3 | 0.488996 | 1 | 2  | 0.02746  | Function unknown                                                                   |
| Uncharacterized protein                                       | A0A4X1UNF8 | 0.487309 | 6 | 11 | 0.04788  | Signal transduction; nucleoside-triphosphatase regulator activity                  |
| Uncharacterized protein                                       | F1S1J3     | 0.486339 | 3 | 8  | 0.01053  | Function unknown                                                                   |
| Zinc finger protein 75D isoform 1                             | A0A480WRF9 | 0.485954 | 2 | 6  | 0.005528 | Transcription regulator activity                                                   |
| Uncharacterized protein                                       | A0A4X1VFS0 | 0.485522 | 4 | 11 | 0.01376  | Metal ion transmembrane transporter activity                                       |
| ADP-ribosylation factor-like protein 6-interacting protein 1  | K9IVS1     | 0.484915 | 3 | 23 | 0.01131  | Positive regulation of cellular process; protein binding                           |
| Phosphatidylinositol 3-kinase 85 kDa regulatory subunit alpha | A0A480WYP1 | 0.483343 | 8 | 12 | 0.0156   | Function unknown                                                                   |
| Nociceptin                                                    | A0A4X1VC77 | 0.483052 | 1 | 4  | 0.03301  | Trans-synaptic signaling; receptor binding                                         |
| Uncharacterized protein                                       | K7GR94     | 0.483037 | 7 | 22 | 0.01187  | Function unknown                                                                   |
| Uncharacterized protein                                       | A0A4X1U128 | 0.482916 | 7 | 5  | 0.03081  | Regulation of dendrite morphogenesis; nucleoside-triphosphatase regulator activity |
| Selenide, water dikinase 2                                    | A1YIZ1     | 0.481357 | 5 | 18 | 0.01293  | Small molecule metabolic process; ribonucleotide binding                           |

|                                                                 |            |          |    |    |          |                                                                                     |
|-----------------------------------------------------------------|------------|----------|----|----|----------|-------------------------------------------------------------------------------------|
| Integrin-associated protein                                     | A0A4X1SPG5 | 0.480792 | 2  | 14 | 0.03833  | Positive regulation of cellular process; thrombospondin receptor activity           |
| Arylamine N-acetyltransferase                                   | A0A480RQR3 | 0.480345 | 1  | 41 | 0.009758 | Function unknown                                                                    |
| Ras-specific guanine<br>nucleotide-releasing factor             | F1S6Y4     | 0.479958 | 2  | 3  | 0.02502  | Regulation of intracellular signal transduction; binding                            |
| RaIGPS2 isoform X1                                              |            |          |    |    |          |                                                                                     |
| 3-hydroxy-3-methylglutaryl<br>coenzyme A reductase              | A0A4X1SQE9 | 0.478816 | 8  | 11 | 0.02141  | Function unknown                                                                    |
| Aminopeptidase                                                  | K9J6I5     | 0.478772 | 3  | 38 | 0.0296   | Function unknown                                                                    |
| Tr-type G domain-containing<br>protein                          | A0A4X1WBZ8 | 0.478177 | 21 | 32 | 0.002029 | Translational initiation; translation initiation factor activity                    |
| Uncharacterized protein                                         | A0A4X1TDI0 | 0.475825 | 5  | 5  | 0.004227 | Negative regulation of cellular process; enzyme activator activity                  |
| UBC core domain-containing<br>protein                           | A0A4X1U068 | 0.475565 | 9  | 66 | 0.006022 | Positive regulation of cellular process; small molecule binding                     |
| Signal peptidase complex<br>catalytic subunit SEC11             | A0A481CTH0 | 0.472836 | 5  | 18 | 0.01137  | Peptide metabolic process; peptidase activity, acting on L-amino acid peptides      |
| Uncharacterized protein                                         | A0A5G2Q6W7 | 0.47243  | 6  | 11 | 0.009123 | Biological adhesion;                                                                |
| Cyclin B1 transcript variant 1                                  | D2IE28     | 0.472165 | 6  | 19 | 0.005151 | Positive regulation of cellular process; catalytic activity, acting on a protein    |
| Elongation of very long chain<br>fatty acids protein (Fragment) | B3VHV3     | 0.472039 | 2  | 6  | 0.01382  | Fatty acid elongation, saturated fatty acid; 3-oxo-lignoceryl-CoA synthase activity |
| Tsukushin                                                       | A0A480V1E4 | 0.469185 | 1  | 8  | 0.03375  | Negative regulation of cellular process;                                            |
| Uncharacterized protein                                         | A0A5G2QJ57 | 0.468477 | 2  | 5  | 0.008982 | Function unknown                                                                    |
| Ras-related protein Rap-2a                                      | Q06AU2     | 0.468207 | 6  | 63 | 0.004798 | Positive regulation of cellular process; nucleoside-triphosphatase activity         |
| Eyes absent homolog                                             | A0A4X1TSB9 | 0.467345 | 1  | 12 | 0.003146 | Function unknown                                                                    |
| GMP reductase                                                   | A0A4X1VQX6 | 0.467062 | 6  | 37 | 0.003135 | Carbohydrate derivative metabolic process; oxidoreductase activity, acting on NAD(P |
| Protein kinase domain-<br>containing protein                    | A0A287AK13 | 0.467013 | 4  | 7  | 0.01534  | Function unknown                                                                    |

|                                                                             |            |          |    |    |          |                                                                                    |
|-----------------------------------------------------------------------------|------------|----------|----|----|----------|------------------------------------------------------------------------------------|
| Uncharacterized protein                                                     | A0A287A841 | 0.466915 | 2  | 34 | 0.003472 | Function unknown                                                                   |
| Myotubularin-related protein<br>11 isoform a                                | A0A480EMZ5 | 0.465595 | 2  | 3  | 0.03774  | Function unknown                                                                   |
| Zinc finger protein 318<br>(Fragment)                                       | H9LC64     | 0.464868 | 1  | 2  | 0.01094  | Positive regulation of transcription, DNA-templated; protein dimerization activity |
| HTH La-type RNA-binding<br>domain-containing protein                        | A0A4X1SXY3 | 0.462162 | 2  | 5  | 0.03114  | Regulation of translation; heterocyclic compound binding                           |
| Uridine-cytidine kinase                                                     | A0A4X1T9P1 | 0.462136 | 2  | 13 | 0.02419  | Phosphorus metabolic process; small molecule binding                               |
| tRNA pseudouridine synthase                                                 | F1RJE9     | 0.462094 | 3  | 16 | 0.001417 | RNA processing; catalytic activity, acting on a tRNA                               |
| ATP-dependent<br>dihydroxyacetone kinase                                    | A0A481D2Y6 | 0.460821 | 1  | 49 | 0.03863  | Negative regulation of cellular process; small molecule binding                    |
| Histone-lysine N-<br>methyltransferase, H3 lysine-<br>79 specific           | A0A4X1VSM5 | 0.460697 | 3  | 2  | 0.000932 | Function unknown                                                                   |
| Eukaryotic translation initiation<br>factor 1A domain-containing<br>protein | F1RU32     | 0.460416 | 6  | 46 | 0.000608 | Translation initiation factor activity                                             |
| Uncharacterized protein                                                     | A0A4X1USN7 | 0.459772 | 2  | 3  | 0.03996  | Zinc ion binding                                                                   |
| Uncharacterized protein                                                     | A0A5G2QQ23 | 0.458332 | 3  | 8  | 0.04624  | Function unknown                                                                   |
| Serine/threonine-protein<br>kinase RIO1                                     | A0A4X1SJG2 | 0.456584 | 10 | 23 | 0.005579 | Function unknown                                                                   |
| Tetraspanin                                                                 | F1SKA6     | 0.456549 | 1  | 2  | 0.01583  | Function unknown                                                                   |
| RING-type E3 ubiquitin<br>transferase                                       | I3LRN0     | 0.456405 | 31 | 46 | 0.006452 | Function unknown                                                                   |
| BLOC-1-related complex<br>subunit 7                                         | A0A4X1TT04 | 0.45605  | 1  | 4  | 0.02869  | Function unknown                                                                   |

|                                                        |            |          |   |    |          |                                                                                                                    |
|--------------------------------------------------------|------------|----------|---|----|----------|--------------------------------------------------------------------------------------------------------------------|
| Centromere protein X                                   | A0A5G2QZG8 | 0.452783 | 3 | 21 | 0.01167  | Function unknown                                                                                                   |
| Mediator of RNA polymerase II transcription subunit 31 | A0A4X1UL35 | 0.452257 | 1 | 13 | 0.003928 | Negative regulation of cellular process; transcription regulator activity                                          |
| IRF tryptophan pentad repeat domain-containing protein | A0A287B4G6 | 0.451938 | 2 | 4  | 0.009961 | Defense response to other organism; RNA polymerase II transcription factor activity, sequence-specific DNA binding |
| Daxx                                                   | A0A480ZCA1 | 0.45187  | 3 | 6  | 0.001048 | Function unknown                                                                                                   |
| Uncharacterized protein                                | A0A5G2QG05 | 0.450502 | 3 | 11 | 0.01634  | UDP-glycosyltransferase activity                                                                                   |
| Uncharacterized protein                                | A0A4X1TY47 | 0.45045  | 2 | 13 | 0.04168  | Vesicle-mediated transport to the plasma membrane;                                                                 |
| Uncharacterized protein                                | A0A4X1VWJ9 | 0.449471 | 2 | 23 | 0.03409  | Function unknown                                                                                                   |
| 2-aminoethanethiol (Cysteamine) dioxygenase            | F1RFB8     | 0.44526  | 6 | 34 | 0.008605 | Oxidoreductase activity                                                                                            |
| TBC1 domain family member 10B                          | A0A480HHS2 | 0.444695 | 5 | 7  | 0.01699  | Function unknown                                                                                                   |
| TBC1 domain family member 20                           | A0A287A634 | 0.443482 | 2 | 7  | 0.01015  | Positive regulation of cellular process; enzyme regulator activity                                                 |
| Uncharacterized protein                                | F1RY93     | 0.44232  | 2 | 7  | 0.01454  | Ribonucleotide binding                                                                                             |
| Uncharacterized protein                                | A0A5G2QCE4 | 0.441123 | 1 | 0  | 0.04386  | Function unknown                                                                                                   |
| Spindle and kinetochore-associated protein 1           | A0A4X1UHG2 | 0.440104 | 2 | 10 | 0.02395  | Regulation of microtubule cytoskeleton organization; protein binding                                               |
| COMM domain-containing protein 2 (Fragment)            | A0A480M9T9 | 0.439147 | 3 | 21 | 0.000176 | Function unknown                                                                                                   |
| Pirh2                                                  | A1YJE5     | 0.438708 | 3 | 10 | 0.01085  | Zinc ion binding                                                                                                   |
| Plectin isoform X1-like (Fragment)                     | A0A480PNR4 | 0.437272 | 5 | 72 | 0.000423 | Function unknown                                                                                                   |
| Lamin isoform C                                        | A0A480V981 | 0.437257 | 1 | 74 | 0.0278   | Positive regulation of cellular process;                                                                           |
| Dolichyl-                                              | A0A4X1VZL2 | 0.437045 | 1 | 8  | 0.04047  | Function unknown                                                                                                   |

|                             |            |          |    |    |          |                                                                                               |
|-----------------------------|------------|----------|----|----|----------|-----------------------------------------------------------------------------------------------|
| diphosphooligosaccharide--  |            |          |    |    |          |                                                                                               |
| protein glycosyltransferase |            |          |    |    |          |                                                                                               |
| subunit KCP2                |            |          |    |    |          |                                                                                               |
| Uncharacterized protein     | A0A287AD66 | 0.436809 | 12 | 28 | 0.01049  | Function unknown                                                                              |
| Uncharacterized protein     | A0A286ZRH1 | 0.436629 | 23 | 27 | 0.01042  | Function unknown                                                                              |
| Tetraspanin                 | A0A480XE15 | 0.434032 | 2  | 12 | 0.01525  | Function unknown                                                                              |
| RING-type E3 ubiquitin      | A0A4X1V887 | 0.433298 | 11 | 27 | 0.000711 | Function unknown                                                                              |
| transferase                 |            |          |    |    |          |                                                                                               |
| Uncharacterized protein     | F1SBB3     | 0.432984 | 33 | 12 | 0.02414  | Function unknown                                                                              |
| Signal transducer and       | A0A4X1W8D9 | 0.432841 | 11 | 16 | 0.009275 | Positive regulation of cellular process; transcription factor activity, sequence-specific DNA |
| activator of transcription  |            |          |    |    |          | binding                                                                                       |
| NEDD8 ultimate buster 1     | A0A287A5K2 | 0.432701 | 18 | 29 | 0.001762 | Regulation of proteolysis;                                                                    |
| isoform X1                  |            |          |    |    |          |                                                                                               |
| Mitochondrial genome        | A0A4X1UZ36 | 0.431877 | 11 | 45 | 0.009679 | Function unknown                                                                              |
| maintenance exonuclease 1   |            |          |    |    |          |                                                                                               |
| Protein kinase domain-      | F1SA79     | 0.431855 | 2  | 5  | 0.004748 | Function unknown                                                                              |
| containing protein          |            |          |    |    |          |                                                                                               |
| High density lipoprotein    | A0A0B8S073 | 0.431185 | 1  | 51 | 0.03245  | RNA binding                                                                                   |
| binding protein             |            |          |    |    |          |                                                                                               |
| Tetratricopeptide repeat    | A0A480WZ89 | 0.430387 | 2  | 5  | 0.03095  | Function unknown                                                                              |
| protein 4 isoform 1         |            |          |    |    |          |                                                                                               |
| WD_REPEATS_REGION           | A0A286ZJE5 | 0.427908 | 2  | 7  | 0.03252  | Function unknown                                                                              |
| domain-containing protein   |            |          |    |    |          |                                                                                               |
| Integrin-associated protein | A0A287BQR8 | 0.427504 | 2  | 20 | 0.006455 | Positive regulation of cellular process; thrombospondin receptor activity                     |
| Fibroblast growth factor-   | B7SLY2     | 0.42709  | 2  | 23 | 0.04116  | Positive regulation of cellular process;                                                      |
| inducible 14                |            |          |    |    |          |                                                                                               |

|                                                                                      |            |          |    |    |          |                                                                                                                                   |
|--------------------------------------------------------------------------------------|------------|----------|----|----|----------|-----------------------------------------------------------------------------------------------------------------------------------|
| UBC core domain-containing protein                                                   | A0A4X1VUG6 | 0.427039 | 4  | 14 | 0.004627 | Binding                                                                                                                           |
| Interferon regulatory factor 6                                                       | E9LK28     | 0.426388 | 4  | 12 | 0.01968  | Regulation of nitrogen compound metabolic process; RNA polymerase II transcription factor activity, sequence-specific DNA binding |
| Uncharacterized protein                                                              | F1RUN3     | 0.423591 | 2  | 5  | 0.01344  | Intracellular protein transport; molecular carrier activity                                                                       |
| RNA-binding protein 12                                                               | I3LLW0     | 0.422556 | 2  | 16 | 0.006122 | Binding                                                                                                                           |
| Phosphoinositide phospholipase C                                                     | A0A480J5N4 | 0.421995 | 11 | 21 | 0.008664 | Function unknown                                                                                                                  |
| Max-like protein X isoform gamma                                                     | F1S1D8     | 0.421918 | 3  | 17 | 0.03145  | Regulation of transcription from RNA polymerase II promoter; protein dimerization activity                                        |
| Threonine synthase-like 2                                                            | I3L5P4     | 0.420544 | 4  | 12 | 0.03255  | Function unknown                                                                                                                  |
| Uncharacterized protein                                                              | A0A287BGU5 | 0.420386 | 1  | 52 | 0.01861  | MRNA processing; poly-purine tract binding                                                                                        |
| Beta-galactoside-binding lectin                                                      | Q7M2S1     | 0.41883  | 1  | 77 | 0.02667  | Function unknown                                                                                                                  |
| Claudin                                                                              | C3VML0     | 0.418121 | 3  | 21 | 0.02533  | Positive regulation of cellular process; transmembrane transporter activity                                                       |
| Nudix hydrolase domain-containing protein                                            | F1RUP7     | 0.417357 | 6  | 36 | 0.006537 | Catalytic activity                                                                                                                |
| Uncharacterized protein                                                              | A0A287AIG3 | 0.416925 | 2  | 10 | 0.006219 | Function unknown                                                                                                                  |
| Uncharacterized protein                                                              | A0A4X1TBN2 | 0.416648 | 1  | 1  | 0.04652  | Function unknown                                                                                                                  |
| Alkylated DNA repair protein alkB homolog 8                                          | I3LA93     | 0.416636 | 8  | 18 | 0.001743 | Function unknown                                                                                                                  |
| Uncharacterized protein                                                              | A0A4X1TDN4 | 0.415118 | 18 | 26 | 0.04776  | Outer dynein arm assembly; protein binding                                                                                        |
| Uncharacterized protein                                                              | A0A5G2R1G6 | 0.412415 | 4  | 53 | 0.01926  | Function unknown                                                                                                                  |
| Tyrosine 3/tryptophan 5-monooxygenase activation protein zeta polypeptide (Fragment) | Q00P21     | 0.411388 | 1  | 46 | 0.03882  | Regulation of nitrogen compound metabolic process;                                                                                |

|                                         |            |          |    |    |          |                                                                                         |
|-----------------------------------------|------------|----------|----|----|----------|-----------------------------------------------------------------------------------------|
| Phospholipid scramblase                 | I3LHI3     | 0.410767 | 4  | 20 | 0.02548  | Sterol homeostasis; protein binding                                                     |
| ILEI domain-containing protein          | A0A5G2R617 | 0.41007  | 4  | 21 | 0.02499  | Function unknown                                                                        |
| Uncharacterized protein                 | I3LKY5     | 0.409672 | 14 | 55 | 0.007143 | Function unknown                                                                        |
| Protein FAM173A isoform 1               | A0A481BZ18 | 0.409438 | 6  | 40 | 0.01832  | Protein methyltransferase activity                                                      |
| RNAse_Zc3h12a domain-containing protein | A0A4X1STC0 | 0.407979 | 1  | 8  | 0.01467  | Function unknown                                                                        |
| Uncharacterized protein                 | A0A4X1THV0 | 0.407291 | 3  | 39 | 0.007339 | Function unknown                                                                        |
| ELAV-like protein                       | A0A4X1WDI2 | 0.407127 | 4  | 13 | 0.01569  | Binding                                                                                 |
| Ig-like domain-containing protein       | A0A4X1VGD3 | 0.406984 | 1  | 4  | 0.02367  | Function unknown                                                                        |
| ER membrane protein complex subunit 10  | A0A480I708 | 0.406619 | 3  | 21 | 0.038    | Function unknown                                                                        |
| Ubiquitinyl hydrolase 1                 | A0A4X1SI54 | 0.406411 | 3  | 16 | 0.001159 | Macromolecule metabolic process; protein binding                                        |
| Uncharacterized protein                 | A0A5G2R8T2 | 0.406233 | 2  | 7  | 0.03379  | Function unknown                                                                        |
| Receptor protein-tyrosine kinase        | F1SUT8     | 0.406043 | 23 | 37 | 0.03996  | Positive regulation of cellular process; transmembrane receptor protein kinase activity |
| Uncharacterized protein                 | F1RNK3     | 0.40556  | 4  | 16 | 0.01227  | Function unknown                                                                        |
| Uncharacterized protein                 | I3LB77     | 0.404818 | 5  | 17 | 0.01193  | Positive regulation of cellular process; mRNA 3'-UTR binding                            |
| rRNA adenine N(6)-methyltransferase     | A0A480VKC7 | 0.40369  | 6  | 32 | 0.01159  | Binding                                                                                 |
| SEC7 domain-containing protein          | A0A4X1U1Q3 | 0.40361  | 1  | 2  | 0.02757  | Function unknown                                                                        |
| ADAR adenosine deaminase RNA specific   | K9J4M6     | 0.403247 | 43 | 46 | 0.02206  | RNA processing; RNA binding                                                             |
| Ubiquitin carboxyl-terminal hydrolase   | A0A4X1UQ80 | 0.401956 | 12 | 17 | 0.01977  | Function unknown                                                                        |

|                                                 |            |          |    |    |          |                                                                                                 |
|-------------------------------------------------|------------|----------|----|----|----------|-------------------------------------------------------------------------------------------------|
| RRM domain-containing protein                   | A0A5G2QT30 | 0.401688 | 1  | 7  | 0.02203  | Function unknown                                                                                |
| CW-type domain-containing protein               | A0A5G2QF40 | 0.399677 | 8  | 10 | 0.01386  | Function unknown                                                                                |
| SERPIN domain-containing protein                | A0A4X1U6E7 | 0.398961 | 7  | 17 | 0.01668  | Function unknown                                                                                |
| PHD-type domain-containing protein              | F1RK19     | 0.397678 | 7  | 21 | 0.03805  | Metal ion binding                                                                               |
| Arrestin domain-containing protein 3 isoform a  | A0A480YTQ3 | 0.397422 | 2  | 4  | 0.04763  | Positive regulation of cellular process; receptor binding                                       |
| UPF0669 protein C6orf120 isoform 2              | I3LL77     | 0.395113 | 2  | 17 | 0.01395  | Function unknown                                                                                |
| Mitotic interactor and substrate of PLK1        | A0A287ALE7 | 0.393942 | 8  | 11 | 0.006481 | Function unknown                                                                                |
| Hepatocyte growth factor receptor               | Q2QLE0     | 0.392729 | 33 | 33 | 0.01336  | Positive regulation of cellular component biogenesis; transmembrane signaling receptor activity |
| Dynactin subunit 5                              | A0A286ZK88 | 0.392721 | 2  | 10 | 0.002037 | Artery development;                                                                             |
| Uncharacterized protein                         | F1RJ87     | 0.392602 | 5  | 16 | 0.02094  | Translational termination; translation release factor activity                                  |
| Cysteine protease                               | A0A5G2Q8U4 | 0.391922 | 5  | 25 | 0.03793  | Process utilizing autophagic mechanism; cysteine-type endopeptidase activity                    |
| Uncharacterized protein                         | A0A286ZWB1 | 0.391089 | 7  | 35 | 0.0488   | Function unknown                                                                                |
| HSF_DOMAIN domain-containing protein            | A0A4X1UPN4 | 0.389285 | 4  | 8  | 0.02948  | Function unknown                                                                                |
| ANK_REP_REGION domain-containing protein        | A0A4X1VJ09 | 0.388617 | 5  | 7  | 0.04452  | Function unknown                                                                                |
| Ferric oxidoreductase domain-containing protein | A0A4X1UFS1 | 0.388235 | 7  | 21 | 0.008876 | Chemical homeostasis; metal ion binding                                                         |

|                                                 |            |          |    |    |          |                                                                                |
|-------------------------------------------------|------------|----------|----|----|----------|--------------------------------------------------------------------------------|
| FAD-binding PCMH-type domain-containing protein | A0A4X1SXF0 | 0.388212 | 9  | 23 | 0.03026  | Function unknown                                                               |
| Neutral amino acid transporter A isoform 1      | I3LAL2     | 0.38764  | 2  | 4  | 0.04976  | Function unknown                                                               |
| Thymidine kinase                                | A0A286ZID2 | 0.387416 | 10 | 45 | 0.004381 | Function unknown                                                               |
| Uncharacterized protein                         | F1RZ68     | 0.386245 | 11 | 13 | 0.009878 | Negative regulation of cellular process;                                       |
| BH3-interacting domain death agonist            | Q4JHS0     | 0.385522 | 7  | 56 | 1.90E-05 | Positive regulation of cellular process; ubiquitin-like protein ligase binding |
| DNA helicase                                    | A0A286ZQR4 | 0.385254 | 2  | 2  | 0.01025  | Function unknown                                                               |
| 3'-5' exoribonuclease 1 isoform X1              | A0A287AID0 | 0.384788 | 2  | 7  | 0.001151 | Function unknown                                                               |
| Probable tRNA (uracil-O(2)-)-methyltransferase  | A0A4X1SU08 | 0.384379 | 2  | 4  | 0.03331  | Function unknown                                                               |
| IF rod domain-containing protein                | A0A4X1WBS5 | 0.38355  | 2  | 10 | 0.02304  | Function unknown                                                               |
| Uncharacterized protein                         | A0A286ZVA8 | 0.383493 | 1  | 60 | 0.01702  | Function unknown                                                               |
| Methionine--tRNA ligase                         | A0A4X1VG66 | 0.383384 | 12 | 30 | 0.0102   | Function unknown                                                               |
| Uncharacterized protein                         | A0A4X1SXM2 | 0.382329 | 1  | 8  | 0.01509  | Signal transduction; receptor binding                                          |
| FAM110_C domain-containing protein              | A0A4X1UP72 | 0.38147  | 3  | 10 | 0.00149  | Function unknown                                                               |
| tRNA-splicing endonuclease subunit Sen2         | F1SQ91     | 0.380746 | 7  | 20 | 0.007143 | RNA processing; catalytic activity, acting on a tRNA                           |
| Rap1 GTPase-activating protein 1 isoform a      | I3LMS2     | 0.380304 | 5  | 10 | 0.007709 | Function unknown                                                               |
| Exonuclease domain-containing protein           | I3L5D1     | 0.379946 | 5  | 21 | 0.02673  | Function unknown                                                               |

|                                                                          |            |          |    |    |          |                                                                                             |
|--------------------------------------------------------------------------|------------|----------|----|----|----------|---------------------------------------------------------------------------------------------|
| Polypeptide N-acetylgalactosaminyltransferase                            | F1RPN0     | 0.379795 | 8  | 21 | 0.02935  | Function unknown                                                                            |
| Transmembrane protein 186                                                | A0A287AQT2 | 0.378524 | 2  | 5  | 0.02112  | Function unknown                                                                            |
| Dolichyl-diphosphooligosaccharide--protein glycosyltransferase subunit 2 | F1SEM2     | 0.376005 | 1  | 52 | 0.03133  | Function unknown                                                                            |
| ATPase WRNIP1 isoform 1                                                  | F1RWX5     | 0.375516 | 3  | 5  | 0.01805  | Function unknown                                                                            |
| Ig-like domain-containing protein                                        | F1RPU6     | 0.375416 | 6  | 22 | 0.01728  | Regulation of biological process;                                                           |
| Ubiquitin-like modifier-activating enzyme 7                              | A0A480VER4 | 0.375129 | 6  | 8  | 0.001627 | Function unknown                                                                            |
| 3-hydroxy-3-methylglutaryl coenzyme A synthase                           | A0A4X1SVG4 | 0.374889 | 1  | 56 | 0.03264  | Organic hydroxy compound metabolic process; catalytic activity                              |
| Uncharacterized protein                                                  | A0A4X1VEH9 | 0.374835 | 2  | 8  | 0.03559  | Anion transmembrane transporter activity                                                    |
| GCFC domain-containing protein                                           | I3L6B6     | 0.374464 | 1  | 1  | 0.03676  | Function unknown                                                                            |
| Uncharacterized protein                                                  | A0A4X1TAJ0 | 0.374419 | 9  | 8  | 0.01385  | Function unknown                                                                            |
| Uncharacterized protein                                                  | A0A4X1VHT0 | 0.373898 | 21 | 33 | 0.0265   | Positive regulation of cellular process; transferase activity, transferring pentosyl groups |
| Uncharacterized protein                                                  | A0A4X1SMZ2 | 0.373571 | 6  | 33 | 0.004126 | Synaptic signaling; binding                                                                 |
| Uncharacterized protein                                                  | A0A4X1TMJ0 | 0.372596 | 1  | 1  | 0.00364  | Function unknown                                                                            |
| Uncharacterized protein                                                  | A0A4X1WDI5 | 0.372385 | 1  | 30 | 0.001976 | Function unknown                                                                            |
| 2-5A-dependent ribonuclease                                              | A0A286ZPJ7 | 0.371818 | 19 | 37 | 0.01578  | MRNA processing; phosphotransferase activity, alcohol group as acceptor                     |
| Uncharacterized protein                                                  | F1S091     | 0.371759 | 3  | 55 | 0.00615  | Cellular response to organonitrogen compound; small molecule binding                        |
| Serine/threonine-protein                                                 | A0A4X1UYN5 | 0.37154  | 4  | 30 | 0.006173 | Function unknown                                                                            |

|                                                               |            |          |    |    |          |                                                                                               |
|---------------------------------------------------------------|------------|----------|----|----|----------|-----------------------------------------------------------------------------------------------|
| kinase PLK                                                    |            |          |    |    |          |                                                                                               |
| SH3 domain-containing protein                                 | I3LS55     | 0.371356 | 1  | 1  | 0.01494  | Function unknown                                                                              |
| Coronin                                                       | A0A4X1TZD0 | 0.370795 | 3  | 7  | 0.01909  | Function unknown                                                                              |
| Uncharacterized protein                                       | A0A4X1TWZ9 | 0.370606 | 6  | 2  | 0.03308  | Function unknown                                                                              |
| Uncharacterized protein                                       | A0A4X1SHH8 | 0.370458 | 1  | 2  | 0.03144  | Function unknown                                                                              |
| 39S ribosomal protein L43, mitochondrial isoform X2           | F1S8U4     | 0.370293 | 6  | 35 | 0.0143   | Translation; structural constituent of ribosome                                               |
| Multifunctional methyltransferase subunit TRM112-like protein | F1RQP1     | 0.3701   | 6  | 54 | 0.01861  | Protein heterodimerization activity                                                           |
| Uncharacterized protein                                       | A0A4X1U855 | 0.368524 | 7  | 17 | 0.02096  | Function unknown                                                                              |
| Integrin beta                                                 | A0A4X1V025 | 0.368325 | 1  | 47 | 0.03017  | Function unknown                                                                              |
| Class E basic helix-loop-helix protein 41                     | A0A287AYR6 | 0.36825  | 2  | 4  | 0.02874  | Function unknown                                                                              |
| Ubiquitinyl hydrolase 1                                       | F1RXF7     | 0.367771 | 8  | 38 | 0.02913  | Thiol-dependent ubiquitin-specific protease activity                                          |
| Epiplakin isoform X1-like (Fragment)                          | A0A480PQZ4 | 0.366945 | 14 | 30 | 0.018    | Function unknown                                                                              |
| Polynucleotide phosphorylase 1                                | A0A287AMV5 | 0.366848 | 44 | 67 | 0.01016  | RNA processing; organic cyclic compound binding                                               |
| Apoptosis-inducing factor 2 isoform X4                        | A0A480J3T0 | 0.36667  | 7  | 31 | 0.02832  | Function unknown                                                                              |
| Uncharacterized protein                                       | A0A4X1SPI0 | 0.3664   | 5  | 10 | 0.04642  | Potassium ion import across plasma membrane; potassium ion transmembrane transporter activity |
| Pannexin_like domain-containing protein                       | A0A286ZWM5 | 0.366106 | 7  | 10 | 0.007317 | C4-dicarboxylate transport; channel activity                                                  |

|                                                                 |            |          |    |    |          |                                                                                                 |
|-----------------------------------------------------------------|------------|----------|----|----|----------|-------------------------------------------------------------------------------------------------|
| Phosphatidate<br>cytidyltransferase,<br>mitochondrial           | A0A4X1UGZ8 | 0.36551  | 10 | 36 | 0.0252   | Phosphatidylglycerol metabolic process; cytidyltransferase activity                             |
| Uncharacterized protein                                         | F1SRY9     | 0.364988 | 6  | 20 | 0.04888  | Function unknown                                                                                |
| Cytochrome c oxidase<br>assembly factor 6 homolog<br>isoform X1 | A0A480IWY5 | 0.364205 | 9  | 7  | 0.01714  | Ribonucleotide binding                                                                          |
| Uncharacterized protein                                         | F1SG83     | 0.363225 | 9  | 10 | 0.004686 | Function unknown                                                                                |
| MARVEL domain-containing<br>protein                             | A0A5G2QU86 | 0.362552 | 2  | 28 | 0.005986 | Function unknown                                                                                |
| Uridine phosphorylase                                           | A0A480S6M1 | 0.360586 | 12 | 50 | 0.03899  | Function unknown                                                                                |
| Protein kinase domain-<br>containing protein                    | A0A4X1U7M2 | 0.360327 | 8  | 25 | 0.0258   | Ribonucleotide binding                                                                          |
| Uncharacterized protein                                         | A0A4X1TB13 | 0.36009  | 8  | 21 | 0.01712  | Protein N-linked glycosylation via asparagine; binding                                          |
| ADP/ATP translocase 3                                           | A0A287AXS7 | 0.359841 | 7  | 65 | 0.03464  | ADP transmembrane transporter activity                                                          |
| Protein-tyrosine<br>sulfotransferase                            | A0A480JPS8 | 0.359432 | 2  | 5  | 0.001727 | Sulfur compound metabolic process; binding                                                      |
| [Histone H3]-lysine(4) N-<br>trimethyltransferase               | A0A287A913 | 0.359284 | 1  | 0  | 0.01427  | Function unknown                                                                                |
| Glycylpeptide N-<br>tetradecanoyltransferase                    | A0A287B6G4 | 0.358486 | 1  | 13 | 0.0234   | N-terminal peptidyl-glycine N-myristoylation; glycylpeptide N-tetradecanoyltransferase activity |
| Smad nuclear-interacting<br>protein 1                           | I3LQU1     | 0.358454 | 6  | 19 | 0.02953  | Function unknown                                                                                |
| UDP-glucuronate<br>decarboxylase 1                              | A0A480TRQ6 | 0.358189 | 9  | 32 | 0.025    | UDP-glucuronate decarboxylase activity                                                          |
| Feline leukemia virus                                           | B7U652     | 0.358039 | 3  | 8  | 0.003564 | Function unknown                                                                                |

|                                                        |            |          |   |    |          |                                                              |
|--------------------------------------------------------|------------|----------|---|----|----------|--------------------------------------------------------------|
| subgroup C receptor 1                                  |            |          |   |    |          |                                                              |
| TNF receptor-associated factor                         | A0A4X1SD40 | 0.357723 | 7 | 12 | 0.01481  | Positive regulation of cellular process; phosphatase binding |
| Uncharacterized protein                                | A0A287AYH3 | 0.357008 | 7 | 42 | 0.007064 | Function unknown                                             |
| RHD domain-containing protein                          | A0A286ZJ10 | 0.356202 | 9 | 27 | 0.004497 | Function unknown                                             |
| Uncharacterized protein                                | A0A287BK29 | 0.355567 | 3 | 9  | 0.01411  | Function unknown                                             |
| Dual specificity protein kinase CLK3 isoform X5        | F1SIE6     | 0.355388 | 8 | 18 | 0.005973 | Cellular process; heterocyclic compound binding              |
| Essential for reactive oxygen species protein          | A0A5G2QFI7 | 0.35538  | 4 | 15 | 0.009897 | Function unknown                                             |
| Uncharacterized protein                                | F1SHQ6     | 0.354665 | 4 | 14 | 0.0108   | Function unknown                                             |
| F-box only protein 28 isoform a                        | A0A480TQ31 | 0.354502 | 3 | 9  | 0.04111  | Function unknown                                             |
| Protein S100-A12                                       | P80310     | 0.354194 | 4 | 57 | 0.008724 | Positive regulation of cellular process; zinc ion binding    |
| Semaphorin-4B isoform 1                                | A0A287A766 | 0.353721 | 7 | 9  | 0.0204   | Function unknown                                             |
| Nuclear envelope integral membrane protein 1 isoform a | F1SL61     | 0.35348  | 5 | 10 | 0.04871  | Function unknown                                             |
| Coatomer subunit delta                                 | A0A287A480 | 0.35291  | 1 | 54 | 0.007025 | Protein transport;                                           |
| Uncharacterized protein                                | A0A4X1V9Q2 | 0.35206  | 5 | 25 | 0.02307  | Function unknown                                             |
| TRUD domain-containing protein                         | A0A4X1TT57 | 0.351643 | 8 | 13 | 8.30E-05 | Function unknown                                             |
| Glycoprotein (Fragment)                                | Q9XSA8     | 0.351317 | 1 | 75 | 0.03703  | Positive regulation of cellular process; mannose binding     |
| Uncharacterized protein                                | A0A4X1TVW1 | 0.351287 | 4 | 4  | 0.006243 | Function unknown                                             |
| Protein kinase C                                       | A0A4X1SI40 | 0.351055 | 2 | 5  | 0.009379 | Signal transduction; ribonucleotide binding                  |
| NAGPA domain-containing                                | A0A287AFK0 | 0.350858 | 5 | 13 | 0.01107  | Function unknown                                             |

|                                             |            |          |    |    |          |                                                                                              |
|---------------------------------------------|------------|----------|----|----|----------|----------------------------------------------------------------------------------------------|
| protein                                     |            |          |    |    |          |                                                                                              |
| Sodium/hydrogen exchanger 1                 | P48762     | 0.350075 | 3  | 5  | 0.01187  | Cation transmembrane transport; active ion transmembrane transporter activity                |
| 60S acidic ribosomal protein P2 (Fragment)  | A0A480V6V6 | 0.349333 | 1  | 54 | 0.002102 | Translational elongation; structural constituent of ribosome                                 |
| HECT-type E3 ubiquitin transferase          | F1SHF6     | 0.349112 | 1  | 20 | 0.002418 | Protein ubiquitination; ligase activity                                                      |
| Uncharacterized protein                     | F1S5D4     | 0.349063 | 11 | 18 | 0.0225   | Function unknown                                                                             |
| Cytochrome c oxidase copper chaperone       | D2XUP7     | 0.348895 | 3  | 59 | 0.005066 | Positive regulation of cellular process; molecular carrier activity                          |
| Uncharacterized protein                     | A0A4X1UHY6 | 0.348871 | 2  | 27 | 0.03725  | Function unknown                                                                             |
| Uncharacterized protein                     | I3LJA8     | 0.348587 | 7  | 7  | 0.008051 | Cell-substrate junction organization;                                                        |
| Arginase                                    | A0A5S8LD81 | 0.347969 | 3  | 13 | 0.03436  | Positive regulation of cellular process; ion binding                                         |
| SLA-8                                       | Q6S7D1     | 0.347946 | 9  | 41 | 0.003237 | Response to stimulus;                                                                        |
| Ubiquitin carboxyl-terminal hydrolase       | A0A4X1W4U5 | 0.347605 | 9  | 48 | 0.00072  | Positive regulation of cellular process; peptidase activity, acting on L-amino acid peptides |
| Uncharacterized protein                     | A0A287BRT1 | 0.347528 | 6  | 14 | 0.02     | Regulation of biological process; binding                                                    |
| DNAJ homolog subfamily A member 1 isoform 1 | F1SE73     | 0.347295 | 19 | 65 | 0.01441  | Positive regulation of cellular process; low-density lipoprotein particle receptor binding   |
| Uncharacterized protein                     | F1SCM9     | 0.347243 | 14 | 31 | 0.001509 | Cellular component organization or biogenesis;                                               |
| WD_REPEATS_REGION domain-containing protein | A0A4X1ST95 | 0.346315 | 5  | 14 | 0.002357 | Positive regulation of cellular process; methylated histone binding                          |
| Uncharacterized protein                     | A0A5G2QEV8 | 0.344341 | 7  | 10 | 0.008928 | Function unknown                                                                             |
| Uncharacterized protein                     | A0A4X1UWU7 | 0.343856 | 1  | 1  | 0.005068 | Function unknown                                                                             |
| HMG domain-containing protein 4             | A0A287B9A3 | 0.343847 | 1  | 3  | 0.0409   | Function unknown                                                                             |
| DNA-directed RNA                            | A0A480YTU7 | 0.343048 | 10 | 15 | 0.03558  | Function unknown                                                                             |

|                                                        |            |          |    |    |          |                                                                             |
|--------------------------------------------------------|------------|----------|----|----|----------|-----------------------------------------------------------------------------|
| polymerase III subunit RPC5 isoform X1                 |            |          |    |    |          |                                                                             |
| t-SNARE coiled-coil homology domain-containing protein | F1RI88     | 0.343019 | 8  | 30 | 0.01115  | Function unknown                                                            |
| Apolipoprotein A2 (Fragment)                           | Q7YRR7     | 0.342979 | 1  | 53 | 0.02916  | Function unknown                                                            |
| Peptidylprolyl isomerase                               | A0A287B5T6 | 0.341704 | 4  | 43 | 0.02346  | Peptidyl-prolyl cis-trans isomerase activity                                |
| Aurora/IPL1-related kinase 1                           | A4UTN8     | 0.340952 | 6  | 18 | 0.03434  | Positive regulation of cellular process; small molecule binding             |
| EABR domain-containing protein                         | A0A287AZV2 | 0.34076  | 13 | 32 | 0.02132  | Anatomical structure development; binding                                   |
| Uncharacterized protein                                | A0A287AK23 | 0.340564 | 1  | 1  | 0.01567  | Function unknown                                                            |
| Non-specific serine/threonine protein kinase           | A0A286ZTS2 | 0.339764 | 1  | 2  | 0.04594  | Function unknown                                                            |
| Solute carrier family 25 member 33 (Fragment)          | A0A480JH88 | 0.339191 | 5  | 17 | 0.02975  | Positive regulation of cellular process; transmembrane transporter activity |
| Kinesin-like protein KIF11                             | F1SC89     | 0.338679 | 32 | 36 | 0.001555 | Microtubule-based movement; small molecule binding                          |
| Uncharacterized protein                                | A0A286ZYM2 | 0.338601 | 7  | 30 | 0.03822  | Cation transmembrane transport; macromolecular complex binding              |
| Uncharacterized protein                                | A0A4X1VV86 | 0.338169 | 4  | 76 | 0.01653  | Negative regulation of cellular process; protein binding                    |
| CBFD_NFYB_HMF domain-containing protein                | A0A4X1V1W7 | 0.337311 | 3  | 24 | 0.03406  | DNA metabolic process; catalytic activity, acting on DNA                    |
| Netrin-1                                               | A0A4X1V6Z8 | 0.336867 | 3  | 8  | 0.009071 | Positive regulation of cellular process;                                    |
| ATPase H(+)-transporting lysosomal accessory protein 2 | A0A5G2QNQ8 | 0.336662 | 1  | 26 | 0.01751  | Function unknown                                                            |
| TMEM189_B_dmain domain-containing protein              | A0A4X1UGG4 | 0.336059 | 5  | 25 | 0.03447  | Ether biosynthetic process; plasmalethanolamine desaturase activity         |
| Uncharacterized protein                                | F1RIB1     | 0.333734 | 3  | 24 | 0.01984  | Function unknown                                                            |
| Twinkle protein, mitochondrial                         | I3LNP8     | 0.333468 | 4  | 8  | 0.00322  | Function unknown                                                            |

|                                                 |            |          |    |    |          |                                                                                      |
|-------------------------------------------------|------------|----------|----|----|----------|--------------------------------------------------------------------------------------|
| isoform A                                       |            |          |    |    |          |                                                                                      |
| C2 domain-containing protein                    | A0A480LG90 | 0.33331  | 2  | 3  | 0.03395  | Binding                                                                              |
| 5 isoform a                                     |            |          |    |    |          |                                                                                      |
| Proteasome inhibitor PI31                       | A0A4X1SLZ8 | 0.333295 | 8  | 41 | 0.0463   | Function unknown                                                                     |
| subunit                                         |            |          |    |    |          |                                                                                      |
| Uncharacterized protein                         | A0A4X1TG55 | 0.331991 | 4  | 48 | 0.02449  | Positive regulation of cellular process; chromatin binding                           |
| NAD-dependent protein                           | A0A287AF07 | 0.331798 | 4  | 18 | 0.005802 | Negative regulation of cellular process; zinc ion binding                            |
| deacylase sirtuin-5,<br>mitochondrial           |            |          |    |    |          |                                                                                      |
| Proteasome subunit beta                         | A0A4X1V3H8 | 0.331163 | 6  | 28 | 0.004506 | Macromolecule metabolic process; peptidase activity, acting on L-amino acid peptides |
| Arylamine N-acetyltransferase<br>(Fragment)     | C5MLY5     | 0.330344 | 1  | 48 | 0.03633  | Function unknown                                                                     |
| DNA polymerase delta subunit<br>2               | A0A4X1UG85 | 0.330184 | 9  | 26 | 0.005542 | DNA biosynthetic process; organic cyclic compound binding                            |
| Serine/threonine-protein<br>kinase A-Raf        | O19004     | 0.330035 | 11 | 31 | 0.002364 | Regulation of proteolysis; binding                                                   |
| Uncharacterized protein                         | I3LGI4     | 0.328383 | 15 | 75 | 0.002551 | Function unknown                                                                     |
| Uncharacterized protein                         | I3L8N8     | 0.328259 | 3  | 3  | 0.02961  | Function unknown                                                                     |
| Transcription factor 7-like 2                   | A0A480NGE4 | 0.327797 | 1  | 2  | 0.02717  | Function unknown                                                                     |
| isoform X19                                     |            |          |    |    |          |                                                                                      |
| Lipoprotein lipase                              | I3LUA0     | 0.327353 | 6  | 20 | 0.03753  | Primary metabolic process; triglyceride lipase activity                              |
| Uncharacterized protein                         | A0A5G2RLA2 | 0.326731 | 2  | 2  | 0.004157 | Function unknown                                                                     |
| Transforming growth factor<br>beta-1 proprotein | P07200     | 0.324801 | 9  | 27 | 0.04651  | Phosphorus metabolic process; receptor binding                                       |
| B30.2/SPRY domain-<br>containing protein        | A0A4X1V4M2 | 0.324587 | 8  | 21 | 0.02232  | Function unknown                                                                     |

|                                                                    |            |          |    |    |          |                                                                                               |
|--------------------------------------------------------------------|------------|----------|----|----|----------|-----------------------------------------------------------------------------------------------|
| Haloacid dehalogenase-like hydrolase domain-containing 5 isoform 2 | A0A480JH79 | 0.324502 | 12 | 50 | 0.02867  | Function unknown                                                                              |
| RNA polymerase III subunit C3                                      | F1SDD7     | 0.324311 | 16 | 37 | 0.001239 | Function unknown                                                                              |
| AAA domain-containing protein                                      | A0A4X1VQN4 | 0.324066 | 1  | 44 | 0.0465   | Function unknown                                                                              |
| Exocyst complex component                                          | A0A480UT78 | 0.322082 | 4  | 8  | 0.03629  | Cellular localization;                                                                        |
| Fas apoptosis inhibitory molecule 1                                | F2YI04     | 0.321928 | 2  | 10 | 0.004236 | Negative regulation of cellular process;                                                      |
| Uncharacterized protein                                            | A0A4X1SLA7 | 0.321314 | 5  | 7  | 0.04702  | Function unknown                                                                              |
| Palmitoyl acyl-CoA oxidase 1 (Fragment)                            | A7J0A9     | 0.320662 | 1  | 53 | 0.01855  | Cellular metabolic process; binding                                                           |
| Glycosaminoglycan xylosylkinase                                    | F1S6Y3     | 0.320054 | 8  | 27 | 0.02554  | Phosphorus metabolic process; transferase activity, transferring phosphorus-containing groups |
| Transmembrane protein 115                                          | F1SJ20     | 0.320046 | 8  | 23 | 0.02048  | Vesicle-mediated transport; binding                                                           |
| SANT domain-containing protein                                     | A0A4X1SJM1 | 0.31986  | 3  | 5  | 0.03798  | Function unknown                                                                              |
| Calcium/calmodulin-dependent protein kinase                        | A0A480Q1T9 | 0.319682 | 6  | 23 | 0.007103 | Function unknown                                                                              |
| Mitochondrial tRNA-specific 2-thiouridylase 1                      | F1SM74     | 0.31867  | 8  | 21 | 0.008486 | Function unknown                                                                              |
| N-acylglucosamine 2-epimerase                                      | P17560     | 0.318449 | 11 | 32 | 0.04328  | Organic acid catabolic process; N-acylglucosamine 2-epimerase activity                        |
| Interferon alpha/beta receptor 1                                   | A0A4X1TWF4 | 0.317277 | 1  | 3  | 0.03656  | Type I interferon signaling pathway; protein binding                                          |
| Anaphase-promoting complex                                         | A0A4X1VSN0 | 0.317071 | 10 | 7  | 0.03966  | Function unknown                                                                              |

|                                                               |            |          |    |    |          |                                                                                              |
|---------------------------------------------------------------|------------|----------|----|----|----------|----------------------------------------------------------------------------------------------|
| subunit 1                                                     |            |          |    |    |          |                                                                                              |
| IF rod domain-containing protein                              | A0A4X1WBK2 | 0.31658  | 31 | 76 | 0.01334  | Function unknown                                                                             |
| PPM-type phosphatase domain-containing protein                | A0A4X1U8I2 | 0.316027 | 15 | 40 | 0.003217 | Phosphorus metabolic process; binding                                                        |
| Ubiquitinyl hydrolase 1                                       | A0A5G2R5Y5 | 0.314815 | 3  | 12 | 0.02353  | Positive regulation of cellular process; peptidase activity, acting on L-amino acid peptides |
| TRAF-type zinc finger domain-containing protein 1             | A0A480LZ70 | 0.314557 | 2  | 7  | 0.005955 | Function unknown                                                                             |
| Uncharacterized protein                                       | A0A4X1TZ89 | 0.314298 | 2  | 4  | 0.01104  | Mitotic cell cycle checkpoint;                                                               |
| Hippocalcin-like protein 1                                    | Q06AT0     | 0.31404  | 6  | 34 | 0.01729  | Binding                                                                                      |
| G protein beta subunit-like                                   | F1RFA8     | 0.313718 | 2  | 5  | 0.03261  | Positive regulation of cellular process; enzyme regulator activity                           |
| T-complex protein 1 subunit epsilon                           | A0A480ZFS4 | 0.313499 | 1  | 74 | 0.02585  | Positive regulation of cellular process; anion binding                                       |
| Non-receptor tyrosine-protein kinase TNK1 isoform X1          | A0A480QM13 | 0.312517 | 9  | 19 | 0.0106   | Function unknown                                                                             |
| Tubulin beta chain                                            | A0A4X1VU50 | 0.311691 | 5  | 69 | 0.009208 | Function unknown                                                                             |
| Mitochondrial import inner membrane translocase subunit TIM17 | A0A4X1VJI6 | 0.31144  | 7  | 51 | 0.02255  | Cellular process; transmembrane transporter activity                                         |
| Cytochrome P450                                               | A7KZR2     | 0.311349 | 2  | 46 | 0.004796 | Oxidoreductase activity                                                                      |
| Secretory carrier-associated membrane protein                 | A0A4X1VTN9 | 0.311256 | 3  | 14 | 0.04467  | Function unknown                                                                             |
| Trimeric intracellular cation channel type B                  | A0A286ZVK0 | 0.311213 | 3  | 13 | 0.03284  | Negative regulation of cellular process; cation transmembrane transporter activity           |
| Uncharacterized protein                                       | A0A4X1W3E2 | 0.31091  | 1  | 2  | 0.00557  | Function unknown                                                                             |
| Large neutral amino acids                                     | K9IVK6     | 0.31049  | 8  | 14 | 0.004316 | Function unknown                                                                             |

|                                |            |          |    |    |          |                                                                                               |
|--------------------------------|------------|----------|----|----|----------|-----------------------------------------------------------------------------------------------|
| transporter small subunit 1    |            |          |    |    |          |                                                                                               |
| Erf4 domain-containing protein | A0A5G2QGA7 | 0.31049  | 5  | 39 | 0.01843  | Vesicle-mediated transport to the plasma membrane;                                            |
| Lysosome membrane protein      | F1RYT3     | 0.310236 | 10 | 25 | 0.01026  | Protein transport; quaternary ammonium group binding                                          |
| 2                              |            |          |    |    |          |                                                                                               |
| High mobility group AT-hook 1  | B6CVL5     | 0.309805 | 1  | 51 | 0.03036  | Function unknown                                                                              |
| transcript variant 2           |            |          |    |    |          |                                                                                               |
| Uncharacterized protein        | F1SG89     | 0.309721 | 3  | 3  | 0.02448  | Function unknown                                                                              |
| Uncharacterized protein        | A0A287BS07 | 0.309344 | 10 | 37 | 0.01814  | Function unknown                                                                              |
| Uncharacterized protein        | A0A4X1TN62 | 0.308466 | 7  | 24 | 0.01658  | Function unknown                                                                              |
| Integrin alpha-5               | A0A480X7T0 | 0.307242 | 16 | 21 | 0.003666 | Positive regulation of cellular process; integrin binding                                     |
| Uncharacterized protein        | A0A4X1VM68 | 0.307029 | 1  | 16 | 0.04126  | Function unknown                                                                              |
| Mothers against                | A0A286ZNF5 | 0.306219 | 3  | 8  | 0.00413  | Positive regulation of cellular process; transcription factor activity, sequence-specific DNA |
| decapentaplegic homolog        |            |          |    |    |          | binding                                                                                       |
| Unconventional myosin-Ie       | A0A287BEA3 | 0.303296 | 26 | 28 | 0.003582 | Ribonucleotide binding                                                                        |
| Aldehyde dehydrogenase         | A0A480KA98 | 0.302723 | 1  | 24 | 0.006033 | Function unknown                                                                              |
| Uncharacterized protein        | A0A4X1TJ15 | 0.302707 | 1  | 3  | 0.003242 | Function unknown                                                                              |
| Major facilitator superfamily  | A1DWM3     | 0.302297 | 3  | 7  | 0.007263 | Function unknown                                                                              |
| domain-containing protein 6    |            |          |    |    |          |                                                                                               |
| Formyltetrahydrofolate         | A0A480VMB4 | 0.302203 | 2  | 47 | 0.005589 | Function unknown                                                                              |
| synthetase                     |            |          |    |    |          |                                                                                               |
| Phosphate transporter          | A0A4X1U8Y8 | 0.301195 | 5  | 11 | 0.01188  | Function unknown                                                                              |
| Radical S-adenosyl             | A0A5G2R1S6 | 0.300949 | 1  | 2  | 0.00058  | Aromatic compound biosynthetic process; iron-sulfur cluster binding                           |
| methionine domain-containing   |            |          |    |    |          |                                                                                               |
| protein                        |            |          |    |    |          |                                                                                               |
| Semaphorin-3C                  | A0A4X1SIW8 | 0.300829 | 16 | 27 | 0.002753 | Function unknown                                                                              |
| Natural resistance-associated  | A0A4X1WCA8 | 0.3002   | 3  | 5  | 0.02671  | Metal ion transmembrane transporter activity                                                  |

|                                                      |            |          |    |    |          |                                                                       |
|------------------------------------------------------|------------|----------|----|----|----------|-----------------------------------------------------------------------|
| macrophage protein 1                                 |            |          |    |    |          |                                                                       |
| Uncharacterized protein                              | A0A287B470 | 0.29986  | 6  | 9  | 0.02888  | Function unknown                                                      |
| Protein C-ets-1 isoform 4                            | A0A480XB33 | 0.299502 | 3  | 14 | 0.02453  | Function unknown                                                      |
| RNA helicase                                         | A6M928     | 0.299287 | 14 | 75 | 0.001266 | Translational initiation; translation initiation factor activity      |
| Uncharacterized protein                              | A0A4X1UJN1 | 0.298791 | 4  | 14 | 0.02141  | Function unknown                                                      |
| Transforming acidic coiled-coil-containing protein 3 | F1S8S7     | 0.298761 | 8  | 16 | 0.01376  | Cellular component organization or biogenesis;                        |
| Cleft lip and palate                                 | A0A4X1TLU2 | 0.298417 | 1  | 37 | 0.005909 | Function unknown                                                      |
| transmembrane protein 1-like protein                 |            |          |    |    |          |                                                                       |
| CKAP2_C domain-containing protein                    | A0A4X1SQC7 | 0.298363 | 17 | 31 | 0.007493 | Function unknown                                                      |
| Heat shock 27 kDa protein                            | A0A5S6G3Y8 | 0.297926 | 10 | 28 | 0.00086  | Regulation of protein phosphorylation; protein binding                |
| Uncharacterized protein                              | A0A287BNX8 | 0.297593 | 9  | 13 | 0.02438  | Function unknown                                                      |
| Uncharacterized protein                              | A0A4X1TTA3 | 0.297198 | 4  | 4  | 0.0123   | Function unknown                                                      |
| Uncharacterized protein                              | A0A286ZMQ7 | 0.296909 | 8  | 26 | 0.01519  | Function unknown                                                      |
| RING-type domain-containing protein                  | A0A287A6L6 | 0.296899 | 13 | 34 | 0.006895 | Positive regulation of cellular process; peptidase inhibitor activity |
| Uncharacterized protein                              | A0A4X1STR1 | 0.296832 | 1  | 1  | 0.003541 | DNA metabolic process; tyrosyl-DNA phosphodiesterase activity         |
| 40S ribosomal protein S23 (Fragment)                 | Q29298     | 0.296738 | 1  | 23 | 0.03345  | Function unknown                                                      |
| Importin N-terminal domain-containing protein        | A0A4X1U4Q1 | 0.296325 | 5  | 16 | 0.004003 | Cellular process; GTPase binding                                      |
| Protein NEDD1 isoform a                              | A0A480SZT8 | 0.295783 | 3  | 7  | 0.03672  | Function unknown                                                      |
| Protein kinase domain-containing protein             | A0A5G2RHW3 | 0.295468 | 10 | 44 | 0.006294 | Function unknown                                                      |

|                                                      |            |          |    |    |          |                                                                                       |
|------------------------------------------------------|------------|----------|----|----|----------|---------------------------------------------------------------------------------------|
| Aa_trans domain-containing protein                   | A0A4X1TLM5 | 0.294733 | 5  | 10 | 0.02129  | Function unknown                                                                      |
| ADP-ribosylation factor-related protein 1 isoform X1 | A0A287AP37 | 0.294482 | 8  | 55 | 0.005971 | GTP binding                                                                           |
| Cytoskeleton-associated protein 4                    | A0A480YZR2 | 0.293807 | 33 | 64 | 0.01406  | Function unknown                                                                      |
| ER membrane protein complex subunit 1                | A0A5G2QQ04 | 0.293111 | 1  | 47 | 0.0332   | Function unknown                                                                      |
| Peroxin-14                                           | A0A4X1W7K3 | 0.293051 | 8  | 23 | 0.006595 | Function unknown                                                                      |
| Uncharacterized protein                              | A0A4X1VZD8 | 0.292286 | 20 | 64 | 0.015    | Function unknown                                                                      |
| Methyl-CpG-binding protein 2                         | A0A5G2QL75 | 0.291948 | 10 | 27 | 0.02958  | Function unknown                                                                      |
| Integrin beta                                        | A0A480QHL7 | 0.291561 | 2  | 48 | 0.000325 | Function unknown                                                                      |
| Ubiquitin-like modifier-activating enzyme ATG7       | D7RA25     | 0.291381 | 8  | 16 | 0.006586 | Positive regulation of cellular process; ligase activity, forming carbon-sulfur bonds |
| Poly(ADP-ribose) glycohydrolase                      | A0A4X1VEI7 | 0.290901 | 8  | 10 | 0.02957  | Function unknown                                                                      |
| SAM_MT_RSMB_NOP domain-containing protein            | A0A4X1UJD8 | 0.290825 | 6  | 22 | 0.03407  | Methylation; binding                                                                  |
| Uncharacterized protein                              | A0A4X1UQ65 | 0.290505 | 4  | 28 | 0.02349  | Positive regulation of cellular process; sugar-phosphatase activity                   |
| Calcium channel flower homolog isoform a             | A0A286ZPA5 | 0.290348 | 1  | 5  | 0.04185  | Function unknown                                                                      |
| Torsin-1B isoform 1 (Fragment)                       | A0A481DX94 | 0.290196 | 3  | 14 | 0.02696  | Function unknown                                                                      |
| N6-adenosine-methyltransferase catalytic subunit     | F1S8J8     | 0.290161 | 10 | 24 | 0.02974  | MRNA processing; mRNA (2'-O-methyladenosine-N6-                                       |

|                                                   |            |          |    |    |          |                                                                                |
|---------------------------------------------------|------------|----------|----|----|----------|--------------------------------------------------------------------------------|
| Uncharacterized protein                           | A0A4X1W7C1 | 0.289805 | 8  | 30 | 0.003703 | Function unknown                                                               |
| Uncharacterized protein                           | F1SJ93     | 0.289607 | 2  | 47 | 0.02474  | Binding                                                                        |
| Uncharacterized protein                           | A0A4X1T3F8 | 0.289594 | 10 | 50 | 0.01262  | Negative regulation of cellular process; protein binding                       |
| Protein tweety homolog                            | A0A4X1TMB9 | 0.289535 | 3  | 5  | 0.03644  | Function unknown                                                               |
| Uncharacterized protein                           | A0A5G2R2D5 | 0.289521 | 18 | 40 | 0.004011 | Function unknown                                                               |
| Uncharacterized protein                           | F1S6F1     | 0.28937  | 2  | 6  | 0.02247  | Function unknown                                                               |
| Transmembrane channel-like protein                | A0A4X1UTJ4 | 0.289037 | 4  | 7  | 0.04297  | Function unknown                                                               |
| Protein kinase domain-containing protein          | A0A4X1SUE0 | 0.28841  | 8  | 18 | 0.01718  | Function unknown                                                               |
| L-serine ammonia-lyase                            | A0A287ASY9 | 0.287988 | 1  | 5  | 0.03602  | Function unknown                                                               |
| DNA-directed RNA polymerase                       | M3V845     | 0.287843 | 15 | 16 | 0.01598  | Function unknown                                                               |
| 60S ribosomal protein L21                         | P49666     | 0.287789 | 12 | 52 | 0.002775 | Translation; RNA binding                                                       |
| Serine/threonine-protein kinase TBK1              | A0A480NCW3 | 0.287513 | 10 | 17 | 0.005557 | Positive regulation of cellular process; small molecule binding                |
| Charged multivesicular body protein 4a (Fragment) | A0A480WNJ0 | 0.287163 | 4  | 17 | 0.02253  | Function unknown                                                               |
| Uncharacterized protein                           | A0A4X1UD59 | 0.287049 | 15 | 34 | 0.01991  | RNA binding                                                                    |
| RNA-binding protein PNO1                          | A0A287B6J3 | 0.286904 | 8  | 49 | 0.02837  | Binding                                                                        |
| Uncharacterized protein                           | A0A287BPL8 | 0.28685  | 18 | 21 | 0.006515 | Cell-cell adhesion via plasma-membrane adhesion molecules; calcium ion binding |
| Uncharacterized protein                           | A0A5G2QE37 | 0.286616 | 1  | 2  | 0.018    | Muscle tissue development; isomerase activity                                  |
| Ribonucleoside-diphosphate reductase              | A0A287AJ98 | 0.28506  | 13 | 43 | 0.003843 | Function unknown                                                               |
| Phospholipid scramblase                           | A0A5G2QX76 | 0.284918 | 5  | 18 | 0.02383  | Function unknown                                                               |
| Ig-like domain-containing                         | A0A4X1VVJ0 | 0.283234 | 3  | 47 | 0.005706 | Biological adhesion;                                                           |

|                                                                      |            |          |    |    |          |                                                                        |
|----------------------------------------------------------------------|------------|----------|----|----|----------|------------------------------------------------------------------------|
| protein                                                              |            |          |    |    |          |                                                                        |
| Uncharacterized protein                                              | A0A4X1TYZ6 | 0.28294  | 4  | 15 | 0.03366  | Function unknown                                                       |
| IST1 homolog                                                         | A0A287A426 | 0.282689 | 15 | 57 | 0.00458  | Function unknown                                                       |
| Serine/threonine-protein kinase Nek6                                 | A0A5S6G0N1 | 0.282603 | 2  | 9  | 0.02898  | Ribonucleotide binding                                                 |
| Uncharacterized protein                                              | A0A4X1VV82 | 0.282522 | 17 | 18 | 0.009253 | Function unknown                                                       |
| PIN2/TERF1-interacting                                               | A0A287AHL8 | 0.282099 | 6  | 27 | 0.02847  | Function unknown                                                       |
| telomerase inhibitor 1 isoform 1                                     |            |          |    |    |          |                                                                        |
| Zyxin                                                                | F1SRV9     | 0.281514 | 1  | 42 | 0.002164 | Ion binding                                                            |
| Cytochrome c oxidase subunit                                         | A0A287BGN0 | 0.281204 | 2  | 43 | 0.01687  | Hydrogen ion transmembrane transporter activity                        |
| SpoU_sub_bind domain-containing protein                              | A0A5G2R9B5 | 0.280591 | 4  | 15 | 0.01278  | RNA processing; RNA binding                                            |
| NADH dehydrogenase [ubiquinone] 1 alpha subcomplex assembly factor 3 | F1SKI6     | 0.27978  | 5  | 45 | 0.0222   | Function unknown                                                       |
| PH domain-containing protein                                         | A0A4X1W5J1 | 0.279376 | 32 | 34 | 0.001466 | Function unknown                                                       |
| Cyclin M4 (Fragment)                                                 | K9IWA2     | 0.278089 | 7  | 12 | 0.004061 | Function unknown                                                       |
| Membrane cofactor protein                                            | A0A4X1TD61 | 0.277373 | 9  | 39 | 0.01213  | Function unknown                                                       |
| ADP-ribosylation factor-like protein 6-interacting protein 4         | A0A287AL31 | 0.277228 | 3  | 18 | 0.02418  | Function unknown                                                       |
| Uncharacterized protein                                              | A0A4X1T4W4 | 0.276835 | 26 | 13 | 0.02143  | Function unknown                                                       |
| GTP-binding protein 1                                                | A0A4X1VLR6 | 0.276833 | 6  | 15 | 0.004588 | Positive regulation of cellular process; ribonucleotide binding        |
| Charged multivesicular body protein 2a                               | A0A481CY36 | 0.27662  | 6  | 17 | 0.005283 | Function unknown                                                       |
| Uncharacterized protein                                              | F1RF76     | 0.276212 | 14 | 24 | 0.04582  | Negative regulation of cellular process; purine ribonucleotide binding |

|                                                            |            |          |    |    |          |                                                                                          |
|------------------------------------------------------------|------------|----------|----|----|----------|------------------------------------------------------------------------------------------|
| Non-specific serine/threonine protein kinase               | A0A480JSC9 | 0.276105 | 17 | 15 | 0.02387  | Function unknown                                                                         |
| 4HBT domain-containing protein                             | A0A4X1VNM5 | 0.275689 | 4  | 26 | 0.01655  | Function unknown                                                                         |
| J domain-containing protein                                | A0A5G2QJP3 | 0.275662 | 8  | 22 | 0.02282  | Function unknown                                                                         |
| GPI-anchor transamidase                                    | A0A480JKQ6 | 0.275357 | 8  | 34 | 0.009032 | Attachment of GPI anchor to protein; peptidase activity, acting on L-amino acid peptides |
| RanBP-type and C3HC4-type zinc finger-containing protein 1 | F1S7J3     | 0.275243 | 2  | 6  | 0.0125   | Function unknown                                                                         |
| Chloride channel protein                                   | A0A4X1SK26 | 0.275139 | 3  | 5  | 0.04122  | Function unknown                                                                         |
| Leukocyte elastase inhibitor                               | M3TYG7     | 0.274917 | 12 | 34 | 0.002002 | Negative regulation of cellular process; serine-type endopeptidase inhibitor activity    |
| FABP domain-containing protein                             | F6PVY0     | 0.274716 | 5  | 21 | 0.005333 | Binding                                                                                  |
| Uncharacterized protein                                    | A0A4X1V080 | 0.27399  | 3  | 6  | 0.02072  | Positive regulation of cellular component biogenesis;                                    |
| Uncharacterized protein                                    | A0A5G2Q9F2 | 0.273844 | 16 | 21 | 0.01372  | Function unknown                                                                         |
| Dolichyl-phosphate-mannose--protein mannosyltransferase    | A0A481BKM6 | 0.273248 | 3  | 7  | 0.0418   | Function unknown                                                                         |
| Macro domain-containing protein                            | A0A4X1SU91 | 0.273227 | 3  | 7  | 0.03794  | Function unknown                                                                         |
| RISC-loading complex subunit TARBP2 isoform a              | A0A480W1S2 | 0.273173 | 4  | 13 | 0.03236  | Positive regulation of cellular process; siRNA binding                                   |
| DBB domain-containing protein                              | A0A4X1UEY2 | 0.273007 | 25 | 39 | 0.001563 | Function unknown                                                                         |
| Sulfurtransferase                                          | A0A287BPT5 | 0.272857 | 7  | 31 | 0.0129   | Function unknown                                                                         |
| RING-CH-type domain-containing protein                     | A0A4X1V023 | 0.271871 | 10 | 44 | 0.01104  | Positive regulation of cellular process;                                                 |
| Beta-parvin (Fragment)                                     | A0A480MYU1 | 0.271476 | 7  | 29 | 0.003278 | Function unknown                                                                         |

|                                                                                |            |          |    |    |          |                                                                                  |
|--------------------------------------------------------------------------------|------------|----------|----|----|----------|----------------------------------------------------------------------------------|
| PH domain-containing protein                                                   | A0A287BEJ3 | 0.270749 | 26 | 44 | 0.01116  | Function unknown                                                                 |
| Uncharacterized protein                                                        | F1STI9     | 0.27066  | 13 | 34 | 0.03268  | Binding                                                                          |
| V-type proton ATPase subunit a                                                 | A0A4X1STL1 | 0.270438 | 13 | 21 | 0.03479  | Function unknown                                                                 |
| Solute carrier family 30 member 5                                              | B6ECZ1     | 0.270395 | 6  | 10 | 0.004122 | Function unknown                                                                 |
| Transmembrane protein 201 isoform 1                                            | A0A480NUA5 | 0.270323 | 9  | 17 | 0.01464  | Nuclear migration; binding                                                       |
| Formin-like protein 2 isoform X5                                               | A0A480RHY5 | 0.269951 | 14 | 19 | 0.01386  | Function unknown                                                                 |
| Ribonucleases P/MRP protein subunit POP1                                       | F1S0M3     | 0.269949 | 34 | 42 | 0.01089  | RNA processing; catalytic activity, acting on a tRNA                             |
| Protein-S-isoprenylcysteine O-methyltransferase                                | A0A481C9N4 | 0.269679 | 3  | 18 | 0.01732  | Methyltransferase activity                                                       |
| BTB/POZ domain-containing adapter for CUL3-mediated RhoA degradation protein 2 | I3LM60     | 0.269621 | 3  | 16 | 0.00055  | Negative regulation of cellular process; catalytic activity, acting on a protein |
| Mitochondrial import inner membrane translocase subunit Tim10 B                | A0A5G2R1A5 | 0.269582 | 3  | 48 | 0.04843  | Protein transport; metal ion binding                                             |
| Uncharacterized protein                                                        | A0A4X1VJF1 | 0.269478 | 22 | 31 | 0.03647  | MRNA processing;                                                                 |
| Caspase-10 isoform 1 preproprotein                                             | A0A286ZWN2 | 0.268833 | 10 | 26 | 0.007925 | Regulation of biological process; peptidase activity                             |
| Uncharacterized protein                                                        | A0A286ZQP1 | 0.268673 | 21 | 29 | 0.009253 | Function unknown                                                                 |
| Uncharacterized protein                                                        | A0A4X1U6S6 | 0.268401 | 8  | 46 | 0.03467  | Function unknown                                                                 |
| Uncharacterized protein                                                        | A0A4X1SJU0 | 0.268233 | 6  | 21 | 0.01714  | Function unknown                                                                 |

|                                                                                 |            |           |    |    |          |                                                          |
|---------------------------------------------------------------------------------|------------|-----------|----|----|----------|----------------------------------------------------------|
| WD_REPEATS_REGION domain-containing protein                                     | A0A4X1UEH1 | 0.26814   | 3  | 4  | 0.02654  | Regulation of biological process;                        |
| Bcl10                                                                           | A0A4P8ETX9 | 0.268048  | 4  | 16 | 0.001104 | Positive regulation of cellular process; protein binding |
| Methenyltetrahydrofolate cyclohydrolase                                         | F1SLH0     | 0.267124  | 15 | 57 | 0.003007 | Function unknown                                         |
| Bromodomain-containing protein 9 isoform 1                                      | A0A480TXN7 | 0.267025  | 2  | 9  | 0.0106   | Function unknown                                         |
| Uncharacterized protein                                                         | A0A5G2QMR2 | 0.266626  | 5  | 16 | 0.003521 | Function unknown                                         |
| Uncharacterized protein                                                         | A0A287BPU8 | 0.266336  | 6  | 8  | 0.006906 | Function unknown                                         |
| Zyxin                                                                           | A0A481AUZ6 | 0.266226  | 1  | 42 | 0.02571  | Ion binding                                              |
| Uncharacterized protein                                                         | A0A5G2R4I4 | 0.26601   | 1  | 4  | 0.0121   | Function unknown                                         |
| Uncharacterized protein                                                         | A0A4X1U8D6 | 0.264936  | 5  | 17 | 0.04284  | Function unknown                                         |
| ATP-binding cassette, sub-family C (CFTR/MRP), member 13                        | K9J4N7     | 0.264796  | 20 | 22 | 0.00938  | Function unknown                                         |
| N-myc downstream-regulated gene 3 protein                                       | F1S479     | 0.264245  | 8  | 28 | 0.002158 | Function unknown                                         |
| Phosphatidate phosphatase                                                       | D2I970     | 0.26381   | 6  | 10 | 0.005328 | Function unknown                                         |
| Uncharacterized protein                                                         | A0A4X1U7W6 | 0.263763  | 11 | 42 | 0.02621  | Intracellular transport;                                 |
| <b>Downregulated proteins in PK-15-infected cells (a total of 263 proteins)</b> |            |           |    |    |          |                                                          |
| Uncharacterized protein                                                         | A0A4X1VPY8 | -1.73844  | 1  | 0  | 0.0311   | Function unknown                                         |
| Nucleolar and coiled-body phosphoprotein 1 isoform 3                            | A0A480HP04 | -1.075915 | 2  | 32 | 0.004571 | Function unknown                                         |
| Costars domain-containing protein                                               | A0A4X1VHY8 | -1.070759 | 2  | 47 | 0.02314  | Regulation of cellular process;                          |
| Tropomyosin alpha-1 chain                                                       | A0A4X1TT60 | -1.02607  | 1  | 48 | 0.001151 | Function unknown                                         |

|                                                                |            |           |   |    |          |                                                                                                                                                          |
|----------------------------------------------------------------|------------|-----------|---|----|----------|----------------------------------------------------------------------------------------------------------------------------------------------------------|
| Succinate dehydrogenase cytochrome b560 subunit, mitochondrial | D0VWV4     | -1.023671 | 2 | 12 | 0.005618 | Cellular metabolic process; binding                                                                                                                      |
| FXFD domain-containing ion transport regulator                 | Q58K79     | -0.946206 | 2 | 42 | 0.02542  | Potassium ion import across plasma membrane; sodium channel regulator activity                                                                           |
| Glucose-6-phosphate 1-dehydrogenase                            | A0A0B8RVW4 | -0.881936 | 2 | 68 | 0.02565  | Function unknown                                                                                                                                         |
| Olfactory receptor                                             | A0A287AX70 | -0.879124 | 1 | 2  | 0.02989  | Signal transduction; olfactory receptor activity                                                                                                         |
| Na(+)/H(+) exchange regulatory cofactor NHE-RF                 | A0A481BZK7 | -0.85337  | 1 | 56 | 0.01396  | Binding, bridging                                                                                                                                        |
| Uncharacterized protein                                        | A0A5G2QSQ7 | -0.827559 | 1 | 30 | 0.008274 | Response to stimulus; protein binding                                                                                                                    |
| Heterogeneous nuclear ribonucleoprotein K                      | A0A287A699 | -0.795753 | 1 | 60 | 0.001239 | Positive regulation of cellular process; transcriptional activator activity, RNA polymerase II transcription regulatory region sequence-specific binding |
| Syndecan                                                       | F1S0L5     | -0.793107 | 5 | 21 | 0.003058 | Function unknown                                                                                                                                         |
| Low-density lipoprotein receptor-related protein 2             | C0HL13     | -0.778382 | 2 | 24 | 0.01125  | Function unknown                                                                                                                                         |
| Protein jagunal homolog 1                                      | A0A480ZDX8 | -0.744131 | 1 | 7  | 0.004547 | Function unknown                                                                                                                                         |
| DEP domain-containing protein                                  | A0A4X1UQ57 | -0.733291 | 1 | 1  | 0.00978  | System process;                                                                                                                                          |
| Uncharacterized protein                                        | A0A4X1TC08 | -0.723131 | 2 | 43 | 0.0103   | Ruffle assembly;                                                                                                                                         |
| 39S ribosomal protein L51, mitochondrial                       | A0A4X1UUV6 | -0.718027 | 2 | 22 | 0.006842 | Function unknown                                                                                                                                         |
| ATP synthase membrane subunit f                                | A0A4X1U911 | -0.715818 | 2 | 16 | 0.02133  | Function unknown                                                                                                                                         |
| Uncharacterized protein                                        | A0A287BLS0 | -0.707426 | 2 | 29 | 0.003809 | Positive regulation of cellular process; organic cyclic compound binding                                                                                 |
| Uncharacterized protein                                        | A0A4X1UEL7 | -0.698497 | 2 | 8  | 0.003356 | Function unknown                                                                                                                                         |

|                                                            |            |           |    |    |          |                                                                           |
|------------------------------------------------------------|------------|-----------|----|----|----------|---------------------------------------------------------------------------|
| Solute carrier family 3 member 1                           | B2D2K8     | -0.676169 | 10 | 17 | 0.002449 | Function unknown                                                          |
| Acylphosphatase                                            | J9JIK5     | -0.664148 | 2  | 12 | 0.02357  | Acylphosphatase activity                                                  |
| Methyltransferase like 7A                                  | A0A0B8RSL6 | -0.650465 | 1  | 26 | 0.00421  | Function unknown                                                          |
| Mab-21 domain-containing protein                           | A0A4X1TXP6 | -0.64769  | 1  | 3  | 0.000456 | Positive regulation of cellular process; small molecule binding           |
| Uncharacterized protein                                    | A0A5G2R3Z4 | -0.628623 | 30 | 53 | 0.04522  | Function unknown                                                          |
| DNA-directed RNA polymerases I, II, and III subunit RPABC5 | A0A4X1VYD0 | -0.616299 | 2  | 30 | 0.001167 | Aromatic compound biosynthetic process; zinc ion binding                  |
| Uncharacterized protein                                    | A0A5G2QST4 | -0.615868 | 1  | 27 | 0.03032  | Function unknown                                                          |
| ATP synthase subunit a                                     | Q1HBH9     | -0.61512  | 2  | 10 | 0.003376 | Cation transmembrane transport; cation transmembrane transporter activity |
| Uncharacterized protein                                    | A0A4X1VD17 | -0.599825 | 17 | 44 | 0.04624  | Nucleoside phosphate metabolic process; fatty-acyl-CoA synthase activity  |
| Uncharacterized protein                                    | A0A4X1T382 | -0.599098 | 1  | 34 | 0.000937 | Positive regulation of cellular component biogenesis; binding             |
| Uncharacterized protein                                    | A0A4X1W2Y2 | -0.590491 | 15 | 32 | 0.005908 | Function unknown                                                          |
| Uncharacterized protein                                    | A0A287APU9 | -0.590039 | 3  | 5  | 0.02762  | Function unknown                                                          |
| Na(+)/H(+) exchange regulatory cofactor NHE-RF             | B6EAV5     | -0.586255 | 1  | 56 | 0.03215  | Binding, bridging                                                         |
| 60S acidic ribosomal protein P1                            | A0A4X1T568 | -0.582802 | 4  | 96 | 0.008206 | Translation; enzyme regulator activity                                    |
| Sickle tail protein homolog isoform 1                      | A0A480S813 | -0.5752   | 3  | 28 | 0.03532  | Function unknown                                                          |
| 39S ribosomal protein L33, mitochondrial                   | A0A4X1TLP9 | -0.574189 | 3  | 49 | 0.01714  | Translation; structural constituent of ribosome                           |
| Envelope protein                                           | Q6W4V3     | -0.571872 | 4  | 38 | 0.00603  | Function unknown                                                          |
| Dystrobrevin                                               | A0A480U1E0 | -0.571399 | 1  | 11 | 0.02634  | Function unknown                                                          |

|                                                 |            |           |    |    |          |                                                                                                                      |
|-------------------------------------------------|------------|-----------|----|----|----------|----------------------------------------------------------------------------------------------------------------------|
| ATP synthase protein 8                          | Q71K49     | -0.561017 | 2  | 39 | 0.001069 | Cation transmembrane transport; transmembrane transporter activity                                                   |
| Uncharacterized protein                         | A0A4X1V3D9 | -0.556866 | 6  | 53 | 0.04805  | Function unknown                                                                                                     |
| Alpha-1-microglobulin                           | A0A480P2R0 | -0.554327 | 2  | 7  | 0.004685 | Protein metabolic process; protein dimerization activity                                                             |
| VWFA domain-containing protein                  | A0A5G2RG33 | -0.553539 | 4  | 3  | 0.01385  | Function unknown                                                                                                     |
| LITAF domain-containing protein                 | A0A4X1VJC1 | -0.55313  | 1  | 4  | 0.01371  | Regulation of NIK/NF-kappaB signaling; RNA polymerase II core promoter proximal region sequence-specific DNA binding |
| Uncharacterized protein                         | A0A5G2QVV0 | -0.543857 | 1  | 68 | 0.03396  | Function unknown                                                                                                     |
| Mitochondrial NDUFA4                            | A1XQS3     | -0.541115 | 6  | 56 | 0.002355 | Function unknown                                                                                                     |
| Protein cordon-bleu isoform b                   | A0A480RTP6 | -0.535727 | 7  | 12 | 0.02446  | Function unknown                                                                                                     |
| Phosphoinositide phospholipase C                | A0A4X1SQG1 | -0.52998  | 1  | 0  | 0.000466 | Negative regulation of cellular process; calcium-dependent phospholipase C activity                                  |
| Uncharacterized protein                         | A0A5G2QGQ5 | -0.522642 | 1  | 41 | 0.03352  | Function unknown                                                                                                     |
| SUI1 domain-containing protein                  | A0A5G2QLD8 | -0.520002 | 3  | 78 | 0.01101  | Regulation of translation; translation initiation factor activity                                                    |
| NADH-ubiquinone oxidoreductase chain 3          | B5KN66     | -0.51547  | 1  | 13 | 0.001701 | Oxidoreductase activity                                                                                              |
| UDP-glucuronosyltransferase                     | F1SM28     | -0.514762 | 11 | 51 | 0.04233  | Function unknown                                                                                                     |
| Uncharacterized protein                         | A0A4X1TPF2 | -0.50651  | 6  | 14 | 0.02736  | Function unknown                                                                                                     |
| Methyltransf_11 domain-containing protein       | A0A4X1W6X4 | -0.505324 | 1  | 26 | 0.001346 | Function unknown                                                                                                     |
| Complex I-MNLL                                  | F1SD73     | -0.501815 | 2  | 34 | 0.001911 | Function unknown                                                                                                     |
| Threonyl-tRNA synthetase                        | A0A480F5A7 | -0.501167 | 1  | 53 | 0.009859 | Function unknown                                                                                                     |
| Complex I-B17                                   | A0A480KM09 | -0.495333 | 4  | 20 | 0.007112 | Mitochondrial electron transport, NADH to ubiquinone;                                                                |
| Mannose-P-dolichol utilization defect 1 protein | Q1EG61     | -0.490797 | 3  | 15 | 0.000828 | Carbohydrate biosynthetic process;                                                                                   |

|                                                                  |            |           |    |    |          |                                                                     |
|------------------------------------------------------------------|------------|-----------|----|----|----------|---------------------------------------------------------------------|
| Uncharacterized protein                                          | A0A287B8I3 | -0.486289 | 5  | 18 | 0.03733  | Function unknown                                                    |
| WD_REPEATS_REGION<br>domain-containing protein                   | A0A5K1UE68 | -0.479411 | 4  | 6  | 0.004916 | Function unknown                                                    |
| Microsomal glutathione S-<br>transferase 3                       | Q2EN77     | -0.476284 | 3  | 25 | 0.04562  | Leukotriene biosynthetic process; glutathione peroxidase activity   |
| SOSS complex subunit C                                           | A0A480MDH4 | -0.47363  | 2  | 23 | 0.006029 | DNA metabolic process;                                              |
| Uncharacterized protein                                          | A0A4X1V1E4 | -0.469897 | 3  | 17 | 0.000469 | Generation of precursor metabolites and energy;                     |
| Caldesmon isoform X1                                             | A0A480TAI8 | -0.467487 | 19 | 40 | 0.03452  | System process; calmodulin binding                                  |
| Gag protein                                                      | R4JTP7     | -0.466897 | 2  | 24 | 0.002376 | Symbiosis, encompassing mutualism through parasitism; binding       |
| Peptidylprolyl isomerase                                         | I3LR51     | -0.465877 | 11 | 43 | 0.01648  | Isomerase activity                                                  |
| Uncharacterized protein                                          | A0A5G2QTG5 | -0.464974 | 5  | 50 | 0.007785 | Regulation of biological process; disulfide oxidoreductase activity |
| 60S ribosomal protein L11                                        | A0A4X1VYM5 | -0.464038 | 1  | 40 | 0.008529 | Positive regulation of cellular process; anion binding              |
| Protein-tyrosine-phosphatase                                     | A0A480JYK3 | -0.461254 | 2  | 2  | 0.04534  | Phosphoprotein phosphatase activity                                 |
| Leucyl-tRNA synthetase                                           | A0A480J1H2 | -0.460836 | 2  | 55 | 0.0185   | Function unknown                                                    |
| 3 beta-hydroxysteroid<br>dehydrogenase/Delta 5-->4-<br>isomerase | Q9N119     | -0.458885 | 3  | 10 | 0.004437 | Response to steroid hormone; steroid delta-isomerase activity       |
| Uncharacterized protein                                          | A0A286ZQ23 | -0.457321 | 12 | 32 | 0.01621  | Catalytic activity                                                  |
| Small nuclear<br>ribonucleoprotein Sm D3                         | A0A4X1V3C3 | -0.457133 | 4  | 48 | 0.03059  | Protein binding                                                     |
| VPS10 domain-containing<br>protein                               | A0A287A1U0 | -0.455375 | 11 | 13 | 0.03193  | Function unknown                                                    |
| PKD domain-containing<br>protein                                 | A0A286ZJF6 | -0.453646 | 7  | 13 | 0.007594 | Function unknown                                                    |
| 6-pyruvoyl tetrahydrobiopterin<br>synthase                       | A0A4X1TBY4 | -0.450699 | 6  | 46 | 0.0441   | Organic hydroxy compound metabolic process; protein binding         |

|                                                              |            |           |    |    |          |                                                                                 |
|--------------------------------------------------------------|------------|-----------|----|----|----------|---------------------------------------------------------------------------------|
| Uncharacterized protein                                      | I3LNG8     | -0.448904 | 1  | 65 | 0.04414  | Response to organic substance; binding                                          |
| HAUS augmin-like complex subunit 8 isoform b                 | A0A287AK92 | -0.444763 | 2  | 5  | 0.04419  | Function unknown                                                                |
| Cold-inducible RNA-binding protein                           | A0A4X1VUM6 | -0.44282  | 4  | 24 | 0.01364  | RNA binding                                                                     |
| Anaphase-promoting complex subunit 4                         | I3LFB6     | -0.442734 | 3  | 5  | 0.002608 | Function unknown                                                                |
| Protein archease                                             | A0A4X1VY44 | -0.437222 | 2  | 16 | 0.03707  | Function unknown                                                                |
| Uncharacterized protein                                      | A0A4X1UGK0 | -0.436728 | 6  | 14 | 0.00111  | Function unknown                                                                |
| Cytochrome c oxidase subunit 1                               | A0A097P5T5 | -0.435674 | 2  | 7  | 0.01063  | Cation transmembrane transport; transmembrane transporter activity              |
| Uncharacterized protein                                      | A0A4X1THY8 | -0.434969 | 2  | 8  | 0.01766  | Negative regulation of cellular process; glutathione binding                    |
| Uncharacterized protein                                      | A0A5K1VSX1 | -0.432688 | 1  | 41 | 0.02495  | Function unknown                                                                |
| Inositol polyphosphate 1-phosphatase isoform X1              | F1SN51     | -0.431851 | 11 | 35 | 0.03587  | Small molecule metabolic process; inositol phosphate phosphatase activity       |
| Uncharacterized protein                                      | A0A4X1TNF0 | -0.430897 | 6  | 80 | 0.04255  | Function unknown                                                                |
| Sorting nexin-3                                              | A0A5G2R4Z1 | -0.428617 | 5  | 56 | 0.01151  | Positive regulation of neuron projection development; protein binding           |
| Glutamyl-tRNA(Gln) amidotransferase subunit C, mitochondrial | A0A4X1T4U0 | -0.422173 | 5  | 51 | 0.004879 | Small molecule metabolic process; ribonucleotide binding                        |
| 4a-hydroxytetrahydrobiopterin dehydratase                    | A0A4X1TCL6 | -0.420495 | 3  | 37 | 0.02287  | Positive regulation of cellular process; phenylalanine 4-monooxygenase activity |
| CARD domain-containing protein                               | A0A4X1UPG3 | -0.413925 | 4  | 32 | 0.03238  | Regulation of biological process;                                               |
| Uncharacterized protein                                      | A0A4X1VHN4 | -0.412898 | 2  | 3  | 0.001515 | Function unknown                                                                |
| Armadillo repeat-containing                                  | I3LLX9     | -0.411838 | 8  | 47 | 0.001317 | Function unknown                                                                |

|                                                                            |            |           |    |    |          |                                                                                                 |
|----------------------------------------------------------------------------|------------|-----------|----|----|----------|-------------------------------------------------------------------------------------------------|
| protein 10 isoform b                                                       |            |           |    |    |          |                                                                                                 |
| Low molecular weight cytosolic acid phosphatase                            | A0A4X1UMF6 | -0.408275 | 3  | 65 | 0.01346  | Hydrolase activity, acting on ester bonds                                                       |
| Dynamin-like 120 kDa protein, form S1                                      | F1SFG7     | -0.405501 | 1  | 52 | 0.004694 | Negative regulation of cellular process; pyrophosphatase activity                               |
| Neuferricin isoform 1                                                      | A0A287B291 | -0.401838 | 4  | 17 | 0.01051  | Positive regulation of cellular process; tetrapyrrole binding                                   |
| Galectin                                                                   | A0A5G2R7M4 | -0.39914  | 10 | 40 | 0.007919 | Binding                                                                                         |
| APC-binding protein EB1                                                    | F6Q3L0     | -0.397089 | 12 | 57 | 0.03179  | Positive regulation of cellular component biogenesis; tubulin binding                           |
| NADH dehydrogenase [ubiquinone] 1 beta subcomplex subunit 8, mitochondrial | A0A480QR88 | -0.395266 | 7  | 53 | 0.003135 | Mitochondrial electron transport, NADH to ubiquinone; oxidoreductase activity, acting on NAD(P) |
| MFS domain-containing protein                                              | A0A4X1VJW9 | -0.395207 | 1  | 2  | 0.03333  | Function unknown                                                                                |
| Uncharacterized protein                                                    | A0A5G2RKU4 | -0.393543 | 1  | 4  | 0.002038 | Function unknown                                                                                |
| Cleavage and polyadenylation specificity factor subunit 5                  | A0A5G2QJ53 | -0.39266  | 12 | 53 | 0.001959 | Positive regulation of cellular process; mRNA 3'-UTR binding                                    |
| Keratinocyte-associated transmembrane protein 2                            | A0A287B7K2 | -0.392271 | 2  | 9  | 0.000871 | Function unknown                                                                                |
| Protein S100 (Fragment)                                                    | A0A480ZBF9 | -0.389632 | 5  | 29 | 0.04552  | Positive regulation of cellular process; receptor binding                                       |
| Serine protease HTRA1                                                      | A0A480SWE4 | -0.389112 | 6  | 19 | 0.01697  | Function unknown                                                                                |
| Hepatocyte nuclear factor 1-beta                                           | A0A4X1T4P3 | -0.387548 | 1  | 24 | 0.02617  | Function unknown                                                                                |
| Moesin                                                                     | A0A4X1VJV5 | -0.387237 | 28 | 58 | 0.03177  | Positive regulation of cellular process; receptor binding                                       |
| Beta-lactamase-like protein 2                                              | F1RU12     | -0.386954 | 14 | 59 | 0.01864  | Zinc ion binding                                                                                |
| Uncharacterized protein                                                    | A0A4X1UK48 | -0.383815 | 10 | 19 | 0.01835  | RNA binding                                                                                     |

|                                                                                |            |           |    |    |          |                                                                             |
|--------------------------------------------------------------------------------|------------|-----------|----|----|----------|-----------------------------------------------------------------------------|
| Uncharacterized protein                                                        | A0A5G2RCE3 | -0.382638 | 46 | 27 | 0.001959 | Inositol 1,4,5 trisphosphate binding                                        |
| U1 small nuclear<br>ribonucleoprotein C                                        | A0A287BG27 | -0.382273 | 3  | 25 | 0.002356 | mRNA splice site selection; zinc ion binding                                |
| NADH dehydrogenase<br>[ubiquinone] 1 alpha<br>subcomplex subunit 6             | A0A480TSQ7 | -0.37908  | 7  | 59 | 0.002628 | Metabolic process;                                                          |
| Tyrosine-protein kinase                                                        | A0A0B8RVQ8 | -0.378626 | 18 | 52 | 0.001386 | Function unknown                                                            |
| Hepatoma-derived growth<br>factor-related protein 2                            | A0A0B8RTM7 | -0.376639 | 13 | 19 | 0.01555  | Function unknown                                                            |
| LIM zinc-binding domain-<br>containing protein                                 | A0A4X1TWY1 | -0.375821 | 3  | 31 | 0.03765  | Signal transduction; heterocyclic compound binding                          |
| Uncharacterized protein                                                        | A0A286ZLW6 | -0.375311 | 1  | 44 | 0.04     | Function unknown                                                            |
| 60S ribosomal protein L13a                                                     | A0A4X1VYE4 | -0.374779 | 11 | 45 | 0.01564  | Negative regulation of cellular process; structural constituent of ribosome |
| Low-density lipoprotein<br>receptor relative with 11<br>ligand-binding repeats | I3L8K1     | -0.373727 | 27 | 17 | 0.02035  | Function unknown                                                            |
| Activated RNA polymerase II<br>transcriptional Coactivator p15                 | A0A287AUW4 | -0.372939 | 8  | 61 | 0.01696  | Positive regulation of cellular process; catalytic activity, acting on DNA  |
| Histone-lysine N-<br>methyltransferase SETD7                                   | I3L115     | -0.372514 | 5  | 16 | 0.04309  | Cellular metabolic process; catalytic activity, acting on a protein         |
| Uncharacterized protein                                                        | A0A4X1UJN2 | -0.372104 | 7  | 16 | 0.005373 | Function unknown                                                            |
| Uncharacterized protein                                                        | A0A287A3A3 | -0.371506 | 11 | 26 | 0.02334  | Function unknown                                                            |
| AMP-binding domain-<br>containing protein                                      | A0A287B8R8 | -0.369988 | 27 | 51 | 0.000338 | Function unknown                                                            |
| Complex I-15 kDa                                                               | A0A4X1VX77 | -0.368641 | 7  | 64 | 0.001678 | Function unknown                                                            |
| Paired domain-containing                                                       | A0A4X1UJ76 | -0.368016 | 8  | 24 | 0.0083   | Function unknown                                                            |

|                                                          |            |           |    |    |          |                                                                      |
|----------------------------------------------------------|------------|-----------|----|----|----------|----------------------------------------------------------------------|
| protein                                                  |            |           |    |    |          |                                                                      |
| Rab11 family-interacting protein 2                       | A0A287BJL3 | -0.366828 | 1  | 5  | 0.0469   | Signal transduction; protein dimerization activity                   |
| Ubiquinol-cytochrome c reductase complex                 | Q2EN79     | -0.365493 | 4  | 63 | 0.001805 | Respiratory chain complex III assembly;                              |
| Uncharacterized protein                                  | A0A286ZRK0 | -0.3645   | 1  | 48 | 0.04036  | Function unknown                                                     |
| Uncharacterized protein                                  | I3LJU0     | -0.363339 | 5  | 7  | 0.03454  | Function unknown                                                     |
| Uncharacterized protein                                  | A0A5G2R8F7 | -0.363134 | 7  | 52 | 0.03574  | Positive regulation of cellular process; metal ion binding           |
| Uncharacterized protein                                  | A0A287AUY1 | -0.361456 | 1  | 7  | 0.04789  | Positive regulation of cellular process; proline-rich region binding |
| Alpha-galactosidase                                      | A0A4X1W6B2 | -0.35897  | 16 | 47 | 0.009742 | Metabolic process;                                                   |
| Uncharacterized protein                                  | A0A4X1VGM0 | -0.35891  | 2  | 11 | 0.007724 | Function unknown                                                     |
| Heterogeneous nuclear ribonucleoprotein D0 isoform c     | A0A480M1B4 | -0.358755 | 15 | 50 | 0.004162 | RNA binding                                                          |
| Ribonuclease P protein subunit p25-like protein          | F1SEB9     | -0.358183 | 3  | 25 | 0.01125  | Binding                                                              |
| Inhibitor of nuclear factor kappa-B kinase subunit alpha | A0A4X1U537 | -0.356545 | 1  | 2  | 0.04751  | Ribonucleotide binding                                               |
| Enhancer of rudimentary homolog                          | A0A4X1TZH0 | -0.355545 | 5  | 31 | 0.002802 | Cell cycle;                                                          |
| Sorbin and SH3 domain-containing protein 2               | A0A4X1VW01 | -0.354712 | 4  | 26 | 0.03358  | Function unknown                                                     |
| Cyclin-dependent kinase 2-associated protein             | F1RFL1     | -0.353623 | 2  | 20 | 0.02467  | Positive regulation of cellular process; protein binding             |
| Uncharacterized protein                                  | F1SES5     | -0.349758 | 14 | 28 | 0.01374  | Function unknown                                                     |
| RNA helicase                                             | I3LB32     | -0.349354 | 6  | 13 | 0.002823 | Ribonucleotide binding                                               |
| UDPGT domain-containing                                  | A0A4X1V679 | -0.346963 | 10 | 19 | 0.001739 | Transferase activity, transferring hexosyl groups                    |

|                                                  |            |           |    |    |          |                                                                    |
|--------------------------------------------------|------------|-----------|----|----|----------|--------------------------------------------------------------------|
| protein                                          |            |           |    |    |          |                                                                    |
| AT-rich interactive domain-containing protein 5B | A0A5G2R8R9 | -0.346144 | 2  | 2  | 0.01695  | Function unknown                                                   |
| Ensconsin isoform 3                              | A0A480SUG5 | -0.346053 | 12 | 19 | 0.006664 | Function unknown                                                   |
| KOW domain-containing protein                    | A0A4X1V977 | -0.345615 | 2  | 35 | 0.001278 | Positive regulation of cellular process; ion binding               |
| protein                                          |            |           |    |    |          |                                                                    |
| NAD kinase 2, mitochondrial                      | A0A287BBX3 | -0.345564 | 1  | 42 | 0.004743 | Nicotinamide nucleotide metabolic process; ribonucleotide binding  |
| Uncharacterized protein                          | A0A5G2RAN0 | -0.34496  | 8  | 22 | 0.01272  | Positive regulation of cellular process;                           |
| Uncharacterized protein                          | A0A4X1T835 | -0.343661 | 4  | 3  | 0.01532  | Function unknown                                                   |
| Aldehyde dehydrogenase                           | I6L6E1     | -0.343562 | 1  | 21 | 0.01918  | Function unknown                                                   |
| Uncharacterized protein                          | A0A4X1TWS7 | -0.342364 | 14 | 68 | 0.003919 | Positive regulation of cellular process; protein binding           |
| Stearoyl-CoA 9-desaturase                        | F6Q284     | -0.342252 | 9  | 24 | 0.03004  | Function unknown                                                   |
| Septin 10                                        | A0A173G6G7 | -0.341978 | 12 | 40 | 0.02112  | GTP binding                                                        |
| Protein GNAS isoform GNASS                       | A0A480UPA5 | -0.341721 | 5  | 43 | 0.02086  | Positive regulation of cellular process; pyrophosphatase activity  |
| Fes1 domain-containing protein                   | F1RGI9     | -0.341664 | 7  | 20 | 0.00463  | Function unknown                                                   |
| protein                                          |            |           |    |    |          |                                                                    |
| Tetraspanin-13                                   | F1SEI8     | -0.339873 | 3  | 21 | 0.01147  | Function unknown                                                   |
| Uncharacterized protein                          | A0A286ZXF7 | -0.339327 | 1  | 50 | 0.01629  | Function unknown                                                   |
| Plexin-B2 isoform X2                             | A0A287BLW6 | -0.338751 | 2  | 48 | 0.0267   | Function unknown                                                   |
| Calponin                                         | A0A4X1VU33 | -0.335713 | 11 | 55 | 0.001207 | Function unknown                                                   |
| Cyclin-dependent kinases regulatory subunit      | A0A4X1W0Z6 | -0.335331 | 2  | 33 | 0.03362  | Positive regulation of cellular process; enzyme regulator activity |
| regulatory subunit                               |            |           |    |    |          |                                                                    |
| AP complex subunit sigma                         | A0A5G2QYA7 | -0.334773 | 6  | 42 | 0.007825 | Vesicle-mediated transport; clathrin adaptor activity              |
| Complex I-9kD                                    | A0A4X1TFI3 | -0.334553 | 1  | 37 | 0.002332 | Function unknown                                                   |
| Cathepsin B                                      | B2CNZ7     | -0.334198 | 10 | 41 | 0.02029  | Decidualization; catalytic activity, acting on a protein           |
| SWI/SNF-related matrix-                          | F1RXE6     | -0.333233 | 16 | 36 | 0.005748 | Negative regulation of cellular process; receptor binding          |

---

associated actin-dependent

regulator of chromatin

subfamily E member 1

|                |            |           |   |    |         |            |
|----------------|------------|-----------|---|----|---------|------------|
| Protein kish-B | A0A4X1TF33 | -0.331898 | 2 | 10 | 0.03749 | Secretion; |
|----------------|------------|-----------|---|----|---------|------------|

---
